# Supplementary material for: Theoretical mechanism study on the electrochemical benzylation of [60]fullerene derivatives
Source: Royal Society of Chemistry journal article supplement (doi:10.1039/d2cp06027b), 2023-01-01
Supplement: d2cp06027b1.pdf [file d2cp06027b1.pdf]

## Supporting Information

# Theoretical mechanism study on the electrochemical benzylation of [60]fullerene derivatives

Nana Ma\*, Wenyue Guo, Tongxin Liu and Guisheng Zhang\*

*School of Chemistry and Chemical Engineering, Key Laboratory of Green Chemical Media and Reactions, Ministry of Education; NMPA Key Laboratory for Research and Evaluation of Innovative Drug; Collaborative Innovation Centre of Henan Province for Green Manufacturing of Fine Chemicals; Henan Normal University, Xinxiang, Henan, 453007*

### Table of Contents

**Table S1** The calculated nature population analysis (NPA) charge values of **IM2**.

**Fig. S1** The energy curve of the rotation of the C<sub>benzene</sub>-C<sub>C60</sub> bond from **IM1** to **IM1-1**.

**Fig. S2** The energy curve of the rotation of the C<sub>benzene</sub>-C<sub>C60</sub> bond from **IM11** to **IM11-1**.

**Fig. S3** The energy curve of the rotation of the C<sub>benzene</sub>-C<sub>C60</sub> bond from **IM3-1** to **IM13**.

**Computational details of  $\Delta G^\ddagger$  and  $\Delta G^\circ$  values**

**Cartesian Coordinate of computed compounds**

**Table S1** The calculated nature population analysis (NPA) charge values of **IM2**.

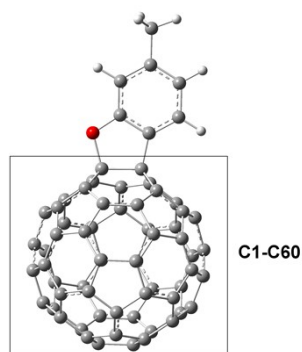

| atoms        | NPA charge | atoms | NPA charge |
|--------------|------------|-------|------------|
| C1           | -0.08218   | C31   | -0.03077   |
| C2           | -0.03296   | C32   | -0.02957   |
| C3 (site b)  | -0.09544   | C33   | -0.05012   |
| C4           | -0.01921   | C34   | -0.01887   |
| C5           | -0.02960   | C35   | -0.02023   |
| C6           | -0.03227   | C36   | -0.02146   |
| C7           | -0.01925   | C37   | -0.02322   |
| C8           | -0.00808   | C38   | -0.02134   |
| C9           | -0.01801   | C39   | -0.06018   |
| C10          | -0.03922   | C40   | -0.02612   |
| C11          | -0.02140   | C41   | -0.00875   |
| C12          | -0.05104   | C42   | -0.02193   |
| C13          | -0.01410   | C43   | -0.02988   |
| C14          | -0.02460   | C44   | -0.02274   |
| C15          | 0.26827    | C45   | -0.00772   |
| C16 (site a) | -0.12419   | C46   | -0.02805   |
| C17          | -0.02030   | C47   | -0.01600   |
| C18          | -0.03102   | C48   | -0.01462   |
| C19          | -0.03345   | C49   | -0.06040   |
| C20          | -0.03694   | C50   | -0.00948   |
| C21          | -0.01707   | C51   | -0.05113   |
| C22          | -0.02459   | C52   | -0.01542   |
| C23          | -0.09270   | C53   | -0.01320   |
| C24          | -0.01211   | C54   | -0.01447   |
| C25          | -0.03370   | C55   | -0.04567   |
| C26          | -0.01882   | C56   | -0.01725   |
| C27          | -0.01484   | C57   | -0.06443   |
| C28          | -0.02106   | C58   | -0.03325   |
| C29          | -0.02520   | C59   | 0.02050    |
| C30          | -0.02546   | C60   | -0.08536   |

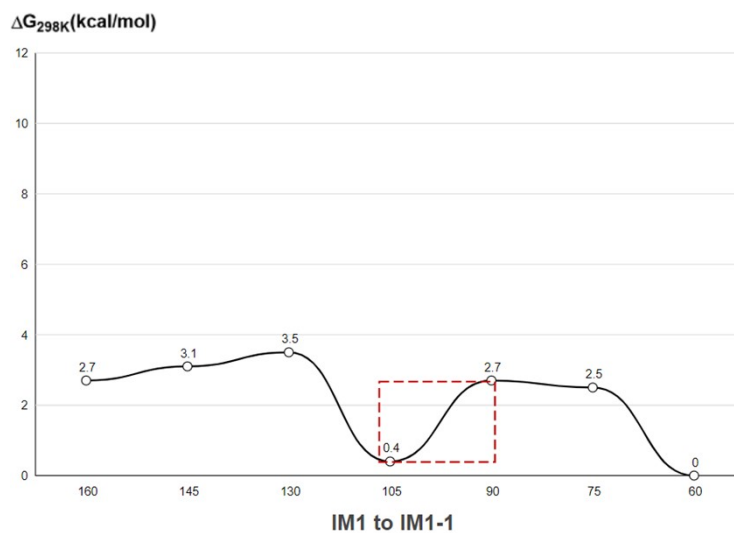

**Fig. S1** The energy curve of the rotation of the  $C_{\text{benzene}}-C_{\text{C60}}$  bond from **IM1** to **IM1-1**.

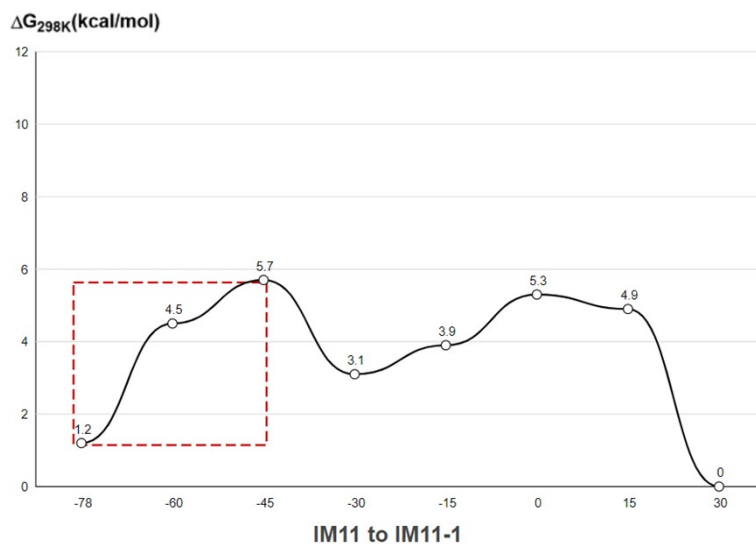

**Fig. S2** The energy curve of the rotation of the  $C_{\text{benzene}}-C_{\text{C60}}$  bond from **IM11** to **IM11-1**.

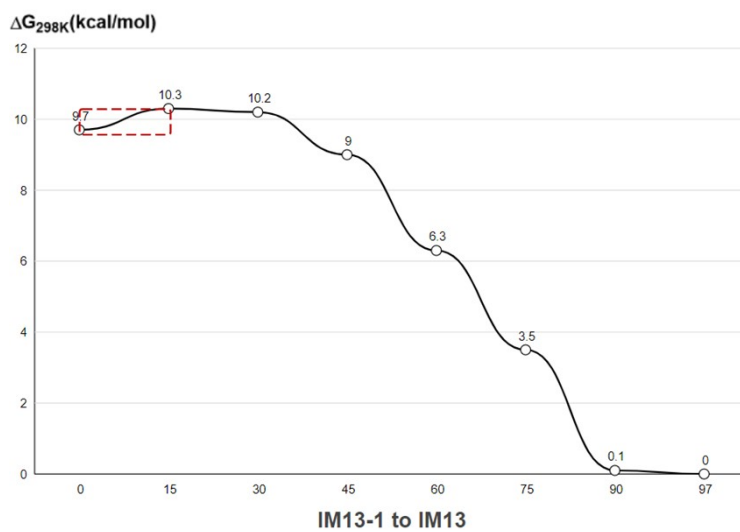

**Fig. S3** The energy curve of the rotation of the  $C_{\text{benzene}}-C_{\text{C60}}$  bond from **IM13-1** to **IM13**.

## Computational details of $\Delta G^\ddagger$ and $\Delta G^\circ$ values

The free energy in the solution-phase  $G(\text{sol})$  has been calculated as follows:

$$G(\text{sol}) = G(\text{gas}) + G(\text{solv})$$

$$G(\text{gas}) = H(\text{gas}) - TS(\text{gas})$$

$$H(\text{gas}) = E(\text{SCF}) + \text{ZPE}$$

$$\Delta E(\text{SCF}) = \Sigma E(\text{SCF}) \text{ for products} - \Sigma E(\text{SCF}) \text{ for reactants}$$

Therefore, the  $\Delta G^\ddagger$  and  $\Delta G^\circ$  values can be calculated as follows:

$$\Delta G^\circ(\text{sol}) = \Sigma G(\text{sol}) \text{ for products} - \Sigma G(\text{sol}) \text{ for reactants}$$

$$\Delta G^\ddagger(\text{sol}) = \Sigma G(\text{sol}) \text{ for transition structures} - \Sigma G(\text{sol}) \text{ for relevant intermediates}$$

$G(\text{gas})$  is the free energy in the gas phase,  $G(\text{sol})$  is the free energy of solvation as computed using the continuum solvation model,  $H(\text{gas})$  is the enthalpy in the gas phase,  $T$  is the absolute temperature (298.15 K),  $S(\text{gas})$  is the entropy in the gas phase,  $E(\text{SCF})$  is the self-consistent field energy, i.e., raw electronic energy as computed from the SCF procedure, and ZPE is the zero-point energy. Note that by entropy here we refer specifically to the vibrational/rotational/translational entropy of the solute(s); the entropy of the solvent is incorporated implicitly in the continuum solvation model.

## Cartesian Coordinate of computed compounds

### IM1-1

-2 (charge), 1(multiplicity)

|   | x           | y           | z           |
|---|-------------|-------------|-------------|
| C | 0.92939200  | 0.82232200  | -1.44583400 |
| C | -0.01680700 | 1.50481500  | -2.25518100 |
| C | -0.72600200 | 2.65155700  | -1.82804300 |
| C | -0.56530800 | 3.04677700  | -0.42447300 |
| C | 0.77243100  | -0.56886700 | -1.69310700 |
| C | -0.21019100 | -0.76753200 | -2.76336300 |
| C | -0.70832600 | 0.53615800  | -3.11682000 |
| C | -2.04860600 | 0.70922500  | -3.46004700 |
| C | -2.11607300 | 2.78979200  | -2.14996700 |
| C | -1.85215100 | 3.49021600  | 0.07685800  |
| C | -2.21526200 | 3.25497000  | 1.40932900  |
| C | -1.30517200 | 2.54845400  | 2.27520600  |
| C | -0.07945900 | 2.10036700  | 1.75878700  |
| C | 0.43659400  | 0.79020300  | 2.11978500  |
| C | 1.17154200  | 0.26437500  | 1.00057600  |
| C | 1.02838200  | -1.07971100 | 0.70163500  |
| C | 0.87702300  | -1.54637000 | -0.68397500 |
| C | -1.05932400 | -1.87390600 | -2.76079100 |
| C | -0.97387500 | -2.85821800 | -1.69856900 |
| C | -0.02929900 | -2.65634500 | -0.67042100 |
| C | -0.41632700 | -2.92237700 | 0.71309400  |
| C | 0.24198300  | -1.94976500 | 1.55387500  |
| C | -0.40922900 | -1.44135900 | 2.68535000  |
| C | -0.30843200 | -0.03470300 | 2.97838900  |
| C | -1.60177500 | 0.41518700  | 3.48031400  |
| C | -2.08733100 | 1.67551500  | 3.13987000  |

|   |             |             |             |
|---|-------------|-------------|-------------|
| C | -2.81735300 | 3.32729500  | -0.98337200 |
| C | -5.32412500 | 0.58162500  | 1.73595100  |
| C | -5.39924200 | 1.52479700  | 0.70445000  |
| C | -5.56859300 | 1.08416700  | -0.67506600 |
| C | -5.66938800 | -0.28046200 | -0.95952400 |
| C | -5.58301500 | -1.25550000 | 0.11245400  |
| C | -4.50786900 | -1.54448000 | 2.31205700  |
| C | -3.84631600 | -0.56675600 | 3.15970800  |
| C | -4.35167900 | 0.74927400  | 2.80268000  |
| C | -3.48798400 | 1.84800300  | 2.79501700  |
| C | -3.56569600 | 2.82885500  | 1.72261100  |
| C | -4.49992800 | 2.66127700  | 0.69493600  |
| C | -4.80192400 | 1.96420300  | -1.53697500 |
| C | -4.12030500 | 1.43306000  | -2.64580500 |
| C | -4.22798200 | 0.01061500  | -2.94480700 |
| C | -4.98171700 | -0.82637900 | -2.12066400 |
| C | -4.47742700 | -2.14251000 | -1.76429800 |
| C | -4.85258300 | -2.40801300 | -0.38272700 |
| C | -3.96630900 | -3.08890700 | 0.45671200  |
| C | -3.79506100 | -2.65119000 | 1.83663400  |
| C | -2.49785400 | -0.72805300 | 3.49179600  |
| C | -1.75633000 | -1.87898300 | 2.99927300  |
| C | -2.39636500 | -2.81468300 | 2.17972300  |
| C | -1.70913200 | -3.35875700 | 1.01618600  |
| C | -2.68354800 | -3.54882100 | -0.04204300 |
| C | -2.31485400 | -3.27679700 | -1.36964400 |
| C | -3.23965700 | -2.56941900 | -2.24631800 |
| C | -2.45915700 | -1.70147100 | -3.11153100 |
| C | -2.94308800 | -0.43739200 | -3.45397400 |
| C | -4.12374700 | 2.92524900  | -0.68815600 |
| C | -2.78553600 | 1.86503100  | -2.98056800 |
| C | -5.42789800 | -0.83630200 | 1.44066300  |
| C | 2.79963400  | 2.01498400  | -0.09719700 |
| C | 4.02032800  | 1.29430100  | -0.13623000 |
| C | 1.38776400  | 1.36819900  | -0.08199000 |
| C | 0.32020900  | 2.38839800  | 0.41257000  |
| O | 3.98543700  | -0.07762800 | -0.15288200 |
| C | 2.89486200  | 3.41452000  | -0.10248600 |
| C | 5.24404900  | 1.98651400  | -0.14697300 |
| H | 1.97748200  | 3.99242400  | -0.08091200 |
| H | 6.19220500  | 1.45492200  | -0.13991000 |
| C | 4.10938700  | 4.09739400  | -0.12500000 |
| C | 5.30705100  | 3.38147200  | -0.13941300 |
| H | 4.11493400  | 5.18648200  | -0.12157300 |

|    |            |             |             |
|----|------------|-------------|-------------|
| C  | 6.66149600 | 4.05652300  | -0.14980900 |
| H  | 6.84313000 | 4.57103600  | -1.10459100 |
| H  | 6.73502700 | 4.81608800  | 0.64060600  |
| H  | 7.46041600 | 3.32001200  | -0.00466900 |
| C  | 5.21137900 | -2.21475800 | -0.12415000 |
| C  | 4.05678000 | -2.95916000 | -0.36825200 |
| C  | 6.42011800 | -2.88427000 | 0.13659100  |
| C  | 4.09825300 | -4.35665300 | -0.33695500 |
| H  | 3.12641100 | -2.44716400 | -0.58290000 |
| C  | 6.45730600 | -4.27702400 | 0.16026800  |
| H  | 7.31975800 | -2.29039700 | 0.30335100  |
| C  | 5.29524800 | -5.02115700 | -0.07159800 |
| H  | 3.18601200 | -4.92047800 | -0.52131300 |
| H  | 7.39839400 | -4.78458000 | 0.36422100  |
| H  | 5.32540300 | -6.10921000 | -0.04621600 |
| Br | 8.68792200 | 0.41057400  | 0.22657400  |
| C  | 5.27791900 | -0.70961700 | -0.16528600 |
| H  | 5.82788900 | -0.39618100 | -1.06226700 |
| H  | 5.88105100 | -0.35619300 | 0.67748100  |

**IM1**

-2 1

|   | x           | y           | z           |
|---|-------------|-------------|-------------|
| C | -2.33206200 | -0.60305100 | 1.29308000  |
| C | -1.68679700 | 0.10342300  | 2.33357000  |
| C | -1.38632800 | 1.48928500  | 2.26584400  |
| C | -1.65009300 | 2.16585800  | 0.99075300  |
| C | -1.74595200 | -1.90010000 | 1.22090800  |
| C | -0.76769900 | -2.04840300 | 2.30084400  |
| C | -0.72649500 | -0.78837400 | 3.00126500  |
| C | 0.47563700  | -0.29983900 | 3.50600800  |
| C | -0.12503900 | 1.96468400  | 2.74471900  |
| C | -0.56972000 | 3.10310400  | 0.73768800  |
| C | -0.12814000 | 3.34403400  | -0.57250100 |
| C | -0.74388400 | 2.63812100  | -1.66702200 |
| C | -1.76094800 | 1.70822100  | -1.39229600 |
| C | -1.80901900 | 0.43934700  | -2.10293200 |
| C | -2.33599100 | -0.55850800 | -1.21642400 |
| C | -1.78657600 | -1.83028500 | -1.24469200 |
| C | -1.50549500 | -2.55798400 | -0.00063400 |
| C | 0.39927900  | -2.79323100 | 2.12031000  |
| C | 0.65770700  | -3.44120300 | 0.84868800  |
| C | -0.28751100 | -3.28620100 | -0.18979300 |
| C | 0.18668800  | -3.05119800 | -1.55392600 |

|   |             |             |             |
|---|-------------|-------------|-------------|
| C | -0.74386600 | -2.15524600 | -2.19931200 |
| C | -0.27541100 | -1.19073600 | -3.10670900 |
| C | -0.82592100 | 0.13961300  | -3.06374500 |
| C | 0.25571200  | 1.08540100  | -3.31016200 |
| C | 0.29568700  | 2.30370200  | -2.63340000 |
| C | 0.38026400  | 2.97764700  | 1.81454000  |
| C | 3.69190900  | 1.95264800  | -1.22093000 |
| C | 3.43760200  | 2.57312000  | 0.00851500  |
| C | 3.71876300  | 1.86629500  | 1.25360000  |
| C | 4.26013200  | 0.57698900  | 1.21172600  |
| C | 4.51490400  | -0.06365200 | -0.06477200 |
| C | 3.62764500  | -0.09629200 | -2.36567200 |
| C | 2.69306100  | 0.80845400  | -3.01428500 |
| C | 2.73484300  | 2.07790400  | -2.30734900 |
| C | 1.55686400  | 2.80919600  | -2.12136000 |
| C | 1.29202000  | 3.45461300  | -0.84390400 |
| C | 2.21500800  | 3.32705800  | 0.20090500  |
| C | 2.69584800  | 2.21053000  | 2.22114000  |
| C | 2.20557700  | 1.22169500  | 3.09779700  |
| C | 2.76994000  | -0.12160400 | 3.05649600  |
| C | 3.77169800  | -0.43830600 | 2.13584800  |
| C | 3.73255600  | -1.70655800 | 1.42810200  |
| C | 4.19344400  | -1.47307200 | 0.06586400  |
| C | 3.59082600  | -2.15618400 | -0.99480900 |
| C | 3.30823000  | -1.45467900 | -2.24162300 |
| C | 1.47693400  | 0.32407500  | -3.50627500 |
| C | 1.14493400  | -1.08768700 | -3.38032200 |
| C | 2.04608700  | -1.95392300 | -2.74895900 |
| C | 1.55727300  | -2.96603500 | -1.82224200 |
| C | 2.52421000  | -3.10926100 | -0.75032600 |
| C | 2.06637300  | -3.31964400 | 0.56287000  |
| C | 2.69541800  | -2.61093400 | 1.66920700  |
| C | 1.65997900  | -2.28589600 | 2.63599100  |
| C | 1.69756400  | -1.06599100 | 3.31515400  |
| C | 1.75235100  | 3.09275500  | 1.56314800  |
| C | 0.80106900  | 1.11351400  | 3.39250400  |
| C | 4.25353300  | 0.61435100  | -1.26611400 |
| C | -4.45894600 | 0.17411700  | 0.03587900  |
| C | -5.19176700 | -1.08224100 | -0.05324800 |
| C | -2.92079100 | 0.10451200  | 0.06257900  |
| C | -2.25612500 | 1.49914200  | -0.06241500 |
| O | -4.62268000 | -2.21082100 | -0.09763700 |
| C | -5.14318500 | 1.38684300  | 0.09755800  |
| C | -6.63249200 | -0.94156200 | -0.08807700 |

|   |             |             |             |
|---|-------------|-------------|-------------|
| H | -4.57228200 | 2.31140400  | 0.16864900  |
| H | -7.19769000 | -1.87108400 | -0.16298600 |
| C | -6.54018300 | 1.46513900  | 0.07167100  |
| C | -7.29098000 | 0.27728300  | -0.02100300 |
| H | -7.03787600 | 2.43309800  | 0.12301300  |
| C | -8.80599800 | 0.33655300  | -0.01995700 |
| H | -9.24361600 | -0.61111200 | -0.35719500 |
| H | -9.21041600 | 0.54359000  | 0.98327600  |
| H | -9.18160400 | 1.13260400  | -0.67916800 |

**IM2-1**

-2 1

|   | x           | y           | z           |
|---|-------------|-------------|-------------|
| C | -0.44128600 | -2.05162100 | -1.14580200 |
| C | 0.55240400  | -2.97648000 | -0.73643300 |
| C | 0.86382400  | -3.23356800 | 0.61826500  |
| C | 0.21165700  | -2.38501200 | 1.62502900  |
| C | 0.03177800  | -1.40959400 | -2.32242700 |
| C | 1.30490600  | -2.01511100 | -2.72616700 |
| C | 1.63228800  | -3.00083700 | -1.72950200 |
| C | 2.95500100  | -3.20218600 | -1.33884600 |
| C | 2.23353800  | -3.38995000 | 1.00754700  |
| C | 1.18731200  | -2.07860400 | 2.65532900  |
| C | 1.17942900  | -0.83196300 | 3.29693100  |
| C | 0.20463300  | 0.15540000  | 2.90706800  |
| C | -0.70603300 | -0.15144600 | 1.88319700  |
| C | -1.03411000 | 0.84319600  | 0.87730800  |
| C | -1.29123300 | 0.17265600  | -0.36866100 |
| C | -0.82854700 | 0.75406500  | -1.53819800 |
| C | -0.19041000 | -0.04544000 | -2.59530900 |
| C | 2.30807400  | -1.24505500 | -3.31521700 |
| C | 2.09699900  | 0.17067400  | -3.54969000 |
| C | 0.86667700  | 0.74325700  | -3.15746000 |
| C | 0.87058900  | 2.04871300  | -2.49995800 |
| C | -0.17811800 | 2.05037200  | -1.50647600 |
| C | 0.00175500  | 2.73121600  | -0.29473600 |
| C | -0.43994400 | 2.11166700  | 0.92899300  |
| C | 0.53146900  | 2.41691300  | 1.97030600  |
| C | 0.84640100  | 1.46291700  | 2.93534700  |
| C | 2.43943400  | -2.69225800 | 2.27646200  |
| C | 4.49900800  | 1.42628100  | 2.38764100  |
| C | 4.69672900  | 0.05791900  | 2.60250800  |
| C | 5.34836900  | -0.75235300 | 1.58059400  |
| C | 5.78663200  | -0.15448000 | 0.39552900  |



|   |             |             |             |
|---|-------------|-------------|-------------|
| C | 5.57248900  | 1.26409700  | 0.17393700  |
| C | 3.96621000  | 3.03886200  | 0.76466600  |
| C | 2.91076500  | 3.04296300  | 1.76379600  |
| C | 3.24085400  | 2.04480000  | 2.76860200  |
| C | 2.22737900  | 1.27202700  | 3.34297600  |
| C | 2.43209200  | -0.15154500 | 3.56641400  |
| C | 3.64356800  | -0.74327100 | 3.19390100  |
| C | 4.71948800  | -2.05936300 | 1.56070000  |
| C | 4.51359300  | -2.71447000 | 0.33492900  |
| C | 4.97325600  | -2.09311000 | -0.90163000 |
| C | 5.59147100  | -0.84239600 | -0.87272500 |
| C | 5.26133800  | 0.15548000  | -1.87760300 |
| C | 5.25223100  | 1.45850700  | -1.22864100 |
| C | 4.30151900  | 2.41137400  | -1.60461100 |
| C | 3.64892300  | 3.22418200  | -0.58597100 |
| C | 1.58109200  | 3.22394500  | 1.37399000  |
| C | 1.25064300  | 3.41855600  | -0.03026400 |
| C | 2.26925100  | 3.40969100  | -0.98871800 |
| C | 2.07361300  | 2.71815900  | -2.25591200 |
| C | 3.33629700  | 2.11984600  | -2.64841200 |
| C | 3.33392300  | 0.85688000  | -3.26237300 |
| C | 4.32719600  | -0.13653700 | -2.87250100 |
| C | 3.69029300  | -1.44197200 | -2.90845800 |
| C | 4.00679800  | -2.39966700 | -1.94208500 |
| C | 3.65070700  | -2.04627600 | 2.54221300  |
| C | 3.28157500  | -3.41181100 | 0.06015200  |
| C | 4.95217300  | 2.04813900  | 1.15610700  |
| C | -2.80718400 | -1.99378900 | -0.15672400 |
| C | -4.03625000 | -1.29642800 | -0.11229100 |
| C | -1.38783400 | -1.36181800 | -0.15041200 |
| C | -0.74578900 | -1.44756400 | 1.26946800  |
| O | -4.02325600 | 0.07483300  | -0.09661200 |
| C | -2.87075200 | -3.39515200 | -0.16697700 |
| C | -5.24968500 | -2.00825200 | -0.08841700 |
| H | -1.93755200 | -3.94882600 | -0.20780200 |
| H | -6.20405600 | -1.48756100 | -0.04944600 |
| C | -4.07145300 | -4.09817300 | -0.13555600 |
| C | -5.28420700 | -3.40260900 | -0.09691200 |
| H | -4.05976100 | -5.18713500 | -0.14390400 |
| C | -6.62412600 | -4.10545700 | -0.06834900 |
| H | -6.79240700 | -4.68210700 | -0.98918700 |
| H | -6.68553300 | -4.81586700 | 0.76783300  |
| H | -7.43805200 | -3.37854000 | 0.03259700  |
| C | -5.20737000 | 2.21043700  | -0.11550300 |

|    |             |             |             |
|----|-------------|-------------|-------------|
| C  | -4.01335400 | 2.90897900  | -0.30336500 |
| C  | -6.40480800 | 2.92553600  | 0.05876500  |
| C  | -4.00740100 | 4.30737500  | -0.30631500 |
| H  | -3.09191900 | 2.35908400  | -0.44875300 |
| C  | -6.39411300 | 4.31886600  | 0.04981400  |
| H  | -7.33063000 | 2.36440700  | 0.19096100  |
| C  | -5.19469600 | 5.01721300  | -0.12917100 |
| H  | -3.06655400 | 4.83516400  | -0.44682700 |
| H  | -7.32669800 | 4.86330200  | 0.18650700  |
| H  | -5.18823300 | 6.10586400  | -0.13044200 |
| Br | -8.70087900 | -0.37951300 | 0.20561700  |
| C  | -5.31154000 | 0.70730400  | -0.11530100 |
| H  | -5.87469200 | 0.37716900  | -0.99758900 |
| H  | -5.91151100 | 0.38224700  | 0.74193600  |

**IM2**

-2 1

|   | x           | y           | z           |
|---|-------------|-------------|-------------|
| C | 2.24664900  | 1.15191700  | -1.18034800 |
| C | 1.53087100  | 2.34826600  | -0.94604000 |
| C | 1.23773500  | 2.84101400  | 0.35822500  |
| C | 1.58054100  | 1.96251400  | 1.47660300  |
| C | 1.65959800  | 0.49937700  | -2.31127900 |
| C | 0.61853600  | 1.35480300  | -2.86286800 |
| C | 0.52751600  | 2.50950900  | -1.99891800 |
| C | -0.71037800 | 3.09486800  | -1.73011800 |
| C | -0.05559200 | 3.38847000  | 0.63052500  |
| C | 0.52487000  | 2.05026300  | 2.47465100  |
| C | 0.17894500  | 0.93026000  | 3.23932500  |
| C | 0.86620400  | -0.32041700 | 3.02727600  |
| C | 1.84821400  | -0.39931500 | 2.01216000  |
| C | 1.98280500  | -1.57030700 | 1.19296300  |
| C | 2.68640200  | -1.23825200 | -0.11424600 |
| C | 1.90898200  | -1.75436700 | -1.27613800 |
| C | 1.49478400  | -0.90009200 | -2.36013800 |
| C | -0.53952000 | 0.81871100  | -3.44712000 |
| C | -0.70789300 | -0.61882300 | -3.49961200 |
| C | 0.29351500  | -1.44749000 | -2.96075800 |
| C | -0.07255800 | -2.61041000 | -2.17961000 |
| C | 0.92610600  | -2.76656400 | -1.12777900 |
| C | 0.51685600  | -3.27325000 | 0.13663200  |
| C | 1.04432800  | -2.59356200 | 1.30942300  |
| C | -0.01188000 | -2.50372200 | 2.30870700  |
| C | -0.09555300 | -1.39187400 | 3.15087300  |
| C | -0.49767300 | 2.92260400  | 1.94817500  |

|   |             |             |             |
|---|-------------|-------------|-------------|
| C | -3.57972000 | -0.47564600 | 2.35046900  |
| C | -3.41414700 | 0.91396900  | 2.40310500  |
| C | -3.79189300 | 1.74396400  | 1.26361100  |
| C | -4.31942200 | 1.13121100  | 0.11737100  |
| C | -4.48935400 | -0.30652000 | 0.06405600  |
| C | -3.44873600 | -2.36653000 | 0.95388000  |
| C | -2.45845500 | -2.51205100 | 2.00644800  |
| C | -2.54721000 | -1.34739200 | 2.87798400  |
| C | -1.39067900 | -0.80296500 | 3.44525200  |
| C | -1.21894800 | 0.63998100  | 3.50067100  |
| C | -2.21219400 | 1.47868500  | 2.98143500  |
| C | -2.83669700 | 2.82373600  | 1.14648100  |
| C | -2.40865900 | 3.25214700  | -0.12789600 |
| C | -2.96202700 | 2.61698800  | -1.31920900 |
| C | -3.89433800 | 1.58503500  | -1.19914100 |
| C | -3.80956100 | 0.42339600  | -2.07193200 |
| C | -4.17008400 | -0.74769500 | -1.28438300 |
| C | -3.49926100 | -1.95539300 | -1.48794000 |
| C | -3.12248300 | -2.78787400 | -0.34963600 |
| C | -1.20807500 | -3.07356600 | 1.72960600  |
| C | -0.87427300 | -3.52627900 | 0.37833000  |
| C | -1.84355800 | -3.38654800 | -0.63930500 |
| C | -1.41651300 | -2.91128600 | -1.94830000 |
| C | -2.45305900 | -2.05160900 | -2.49144400 |
| C | -2.09797800 | -0.92068500 | -3.24236700 |
| C | -2.79652900 | 0.33866300  | -3.02859300 |
| C | -1.82586700 | 1.41536500  | -3.15682400 |
| C | -1.91380200 | 2.53894000  | -2.32387400 |
| C | -1.84752100 | 2.65123600  | 2.19496500  |
| C | -1.02657100 | 3.55920200  | -0.38580400 |
| C | -4.13368200 | -1.10824000 | 1.16100800  |
| C | 4.43599700  | 0.46251200  | -0.02534100 |
| C | 4.99134500  | -0.82533400 | -0.03556000 |
| C | 2.91844300  | 0.37413100  | -0.05769100 |
| C | 2.25398200  | 0.76471000  | 1.28126300  |
| O | 4.09576600  | -1.82542500 | -0.09459200 |
| C | 5.27134900  | 1.56723400  | 0.00137700  |
| C | 6.37369800  | -1.01823900 | -0.00471200 |
| H | 4.84338900  | 2.56703000  | -0.00680500 |
| H | 6.77793700  | -2.02805900 | -0.01492400 |
| C | 6.66331200  | 1.38666600  | 0.03413800  |
| C | 7.22022200  | 0.10181700  | 0.03259300  |
| H | 7.32044100  | 2.25455200  | 0.05902100  |
| C | 8.72147700  | -0.08986500 | 0.06708700  |

|   |            |             |             |
|---|------------|-------------|-------------|
| H | 9.03988800 | -0.65506000 | 0.95430600  |
| H | 9.08106700 | -0.64803700 | -0.80862900 |
| H | 9.24551200 | 0.87293100  | 0.08331600  |

**IM3-1**

-2 1

|   | x          | y           | z           |
|---|------------|-------------|-------------|
| C | 0.20605200 | 1.70779500  | 0.03126300  |
| C | 1.07283500 | 2.71340800  | -0.46680200 |
| C | 1.65817700 | 2.66906300  | -1.75294000 |
| C | 1.45801200 | 1.44124500  | -2.53419500 |
| C | 0.48620600 | 1.55088700  | 1.41660600  |
| C | 1.47565500 | 2.55227400  | 1.82690700  |
| C | 1.84366900 | 3.28451100  | 0.64347600  |
| C | 3.15669600 | 3.71197100  | 0.45432100  |
| C | 3.02464300 | 3.06671000  | -1.91767600 |
| C | 2.70114900 | 1.13512200  | -3.21861100 |
| C | 3.09642600 | -0.19490200 | -3.41813300 |
| C | 2.26641300 | -1.26054900 | -2.91547500 |
| C | 1.08621600 | -0.93902600 | -2.22561600 |
| C | 0.71643800 | -1.67655300 | -1.02995900 |
| C | 0.03062000 | -0.78695600 | -0.13203800 |
| C | 0.29030500 | -0.89050300 | 1.22502800  |
| C | 0.47363600 | 0.30119100  | 2.06698000  |
| C | 2.42943300 | 2.25837400  | 2.80129600  |
| C | 2.44585100 | 0.95437200  | 3.43573900  |
| C | 1.48943400 | -0.00294000 | 3.03225400  |
| C | 1.91153100 | -1.38876600 | 2.83990500  |
| C | 1.16657700 | -1.93093700 | 1.72761900  |
| C | 1.77291800 | -2.84123900 | 0.85124000  |
| C | 1.53985500 | -2.71172700 | -0.56466700 |
| C | 2.78178400 | -3.02112300 | -1.26069800 |
| C | 3.13674900 | -2.31196500 | -2.40603600 |
| C | 3.67385200 | 2.13300400  | -2.83698900 |
| C | 6.45679200 | -1.17721700 | -1.25156600 |
| C | 6.43106600 | 0.08566200  | -1.85355400 |
| C | 6.63538900 | 1.28163500  | -1.04552600 |
| C | 6.87029200 | 1.16028000  | 0.32706100  |
| C | 6.88775300 | -0.15150900 | 0.94876200  |
| C | 5.85791300 | -2.37520400 | 0.67850900  |
| C | 5.10836800 | -2.92323000 | -0.43935500 |
| C | 5.47870000 | -2.18107400 | -1.63381600 |
| C | 4.51109500 | -1.88358400 | -2.59753900 |
| C | 4.48453700 | -0.57098700 | -3.22525600 |

|   |             |             |             |
|---|-------------|-------------|-------------|
| C | 5.42434800  | 0.39429600  | -2.84953900 |
| C | 5.77981800  | 2.33439300  | -1.55893300 |
| C | 5.14964200  | 3.21711800  | -0.66560800 |
| C | 5.39620500  | 3.09303900  | 0.76608900  |
| C | 6.23318800  | 2.08741000  | 1.25118000  |
| C | 5.86297400  | 1.34606300  | 2.44621800  |
| C | 6.27081100  | -0.03873000 | 2.25829000  |
| C | 5.46035200  | -1.06952400 | 2.74162200  |
| C | 5.25477800  | -2.26703300 | 1.93696100  |
| C | 3.78500100  | -3.33446500 | -0.25870500 |
| C | 3.15749100  | -3.22340000 | 1.05012500  |
| C | 3.88149100  | -2.69113200 | 2.12180600  |
| C | 3.24380700  | -1.76067500 | 3.04362900  |
| C | 4.22620100  | -0.77072200 | 3.44455100  |
| C | 3.82468400  | 0.56421700  | 3.61149800  |
| C | 4.67082000  | 1.64019100  | 3.10982300  |
| C | 3.80351700  | 2.69288000  | 2.60927600  |
| C | 4.15942700  | 3.40505700  | 1.46154900  |
| C | 5.01505600  | 1.77949100  | -2.65999600 |
| C | 3.77662700  | 3.61523300  | -0.85513200 |
| C | 6.69846100  | -1.30423400 | 0.17483300  |
| C | -1.77188300 | 0.76649900  | -1.30619800 |
| C | -2.80819600 | -0.19435000 | -1.29369000 |
| C | -0.30470000 | 0.55163200  | -0.84366800 |
| C | 0.64339300  | 0.41719500  | -2.07657400 |
| O | -2.55232100 | -1.44104100 | -0.78260900 |
| C | -2.08487600 | 2.03284100  | -1.82231600 |
| C | -4.08227600 | 0.13746000  | -1.79348200 |
| H | -1.30413200 | 2.78760300  | -1.83097000 |
| H | -4.88562000 | -0.59452500 | -1.79810500 |
| C | -3.34529900 | 2.36183300  | -2.31151900 |
| C | -4.36702500 | 1.40592800  | -2.30404000 |
| H | -3.53110900 | 3.36246200  | -2.69733600 |
| C | -5.75926000 | 1.70818200  | -2.81705800 |
| H | -6.25317900 | 2.47347200  | -2.20297400 |
| H | -5.73065000 | 2.09251400  | -3.84592500 |
| H | -6.38305200 | 0.80769800  | -2.79946900 |
| C | -3.33016600 | -3.64147800 | -0.05961700 |
| C | -2.05362000 | -3.97716300 | 0.39332700  |
| C | -4.38430000 | -4.55605000 | 0.10659300  |
| C | -1.82576900 | -5.21391400 | 1.00522300  |
| H | -1.24219100 | -3.27127100 | 0.27082900  |
| C | -4.15166300 | -5.78744400 | 0.71516100  |
| H | -5.37708600 | -4.27487500 | -0.24573400 |

|    |             |             |             |
|----|-------------|-------------|-------------|
| C  | -2.87047500 | -6.12313800 | 1.16714000  |
| H  | -0.82483200 | -5.45751300 | 1.35455600  |
| H  | -4.97508800 | -6.48808400 | 0.84018900  |
| H  | -2.69135400 | -7.08516900 | 1.64391200  |
| Br | -7.13555600 | -2.20983600 | -1.59547100 |
| C  | -3.66888600 | -2.33839900 | -0.73739900 |
| H  | -4.51271000 | -1.87025500 | -0.21844900 |
| H  | -4.03111500 | -2.53564700 | -1.75421500 |
| C  | -7.59960300 | 0.25918300  | 0.97414800  |
| C  | -8.50831300 | -0.67695400 | 1.47195200  |
| C  | -9.20975700 | -0.41023300 | 2.64706200  |
| C  | -8.99940200 | 0.79585700  | 3.32797200  |
| C  | -8.08824600 | 1.72551600  | 2.83414800  |
| C  | -7.37648900 | 1.46318700  | 1.65154800  |
| H  | -7.07728500 | 0.00248300  | 0.05463400  |
| H  | -8.62624000 | -1.59848300 | 0.90662500  |
| H  | -9.91774100 | -1.13743400 | 3.04000200  |
| H  | -9.54313500 | 1.00703400  | 4.24684200  |
| H  | -7.92685300 | 2.66543000  | 3.35882700  |
| C  | -6.36366900 | 2.43156800  | 1.14283800  |
| H  | -5.76909100 | 2.89460100  | 1.92915000  |
| H  | -5.71892000 | 2.01375700  | 0.37224700  |
| Br | -7.22226100 | 4.03629500  | 0.24251700  |

### IM3

-2 1

|   | x           | y           | z           |
|---|-------------|-------------|-------------|
| C | -0.36407500 | -1.72145200 | -1.81719700 |
| C | 0.84560000  | -2.38193200 | -2.13235600 |
| C | 1.54158900  | -3.21940500 | -1.21487500 |
| C | 1.02736000  | -3.25135200 | 0.15471000  |
| C | -0.33109100 | -0.42781900 | -2.42939900 |
| C | 0.87728500  | -0.31338700 | -3.23369100 |
| C | 1.62360300  | -1.53439500 | -3.03740600 |
| C | 3.01735100  | -1.50893800 | -2.97848800 |
| C | 2.96756600  | -3.14146400 | -1.13035100 |
| C | 2.15610400  | -3.28136500 | 1.07229300  |
| C | 2.07669200  | -2.63877400 | 2.31313500  |
| C | 0.87224900  | -1.93299900 | 2.67686700  |
| C | -0.19123700 | -1.86770500 | 1.74732800  |
| C | -0.97639100 | -0.67523100 | 1.59386600  |
| C | -1.65318000 | -0.64564800 | 0.23340900  |
| C | -1.40590500 | 0.65132700  | -0.45516000 |
| C | -0.83101600 | 0.71798900  | -1.77883400 |

|   |             |             |             |
|---|-------------|-------------|-------------|
| C | 1.55063500  | 0.90989000  | -3.37680100 |
| C | 1.03740100  | 2.08647100  | -2.70781800 |
| C | -0.12745400 | 1.97612600  | -1.92403200 |
| C | -0.20486500 | 2.65174800  | -0.64568400 |
| C | -0.97434300 | 1.80367800  | 0.25601700  |
| C | -0.64006900 | 1.78528100  | 1.63668500  |
| C | -0.60002800 | 0.47921100  | 2.27696000  |
| C | 0.53055300  | 0.44746600  | 3.19449100  |
| C | 1.24784500  | -0.73477300 | 3.39222000  |
| C | 3.36056800  | -3.19984200 | 0.28035500  |
| C | 4.58143800  | 0.61045800  | 2.56004100  |
| C | 5.07656200  | -0.52909500 | 1.91411100  |
| C | 5.59475900  | -0.43560700 | 0.55313300  |
| C | 5.58981300  | 0.80672500  | -0.09649800 |
| C | 5.07698000  | 1.98486700  | 0.57288200  |
| C | 3.37685000  | 2.60953200  | 2.25584100  |
| C | 2.61818400  | 1.75683000  | 3.15390200  |
| C | 3.36916200  | 0.52365900  | 3.35162100  |
| C | 2.69788900  | -0.69675900 | 3.47649200  |
| C | 3.21182000  | -1.88037200 | 2.80561200  |
| C | 4.37638700  | -1.79159400 | 2.03413500  |
| C | 5.23019900  | -1.64033200 | -0.15991700 |
| C | 4.84010900  | -1.56762000 | -1.51315700 |
| C | 4.84036300  | -0.27455600 | -2.18941300 |
| C | 5.20746500  | 0.88184100  | -1.49914000 |
| C | 4.46137700  | 2.11529900  | -1.69834200 |
| C | 4.37526700  | 2.79260000  | -0.41130200 |
| C | 3.20600900  | 3.47056600  | -0.05971300 |
| C | 2.68613900  | 3.37986100  | 1.30164200  |
| C | 1.22310300  | 1.71147800  | 3.07583800  |
| C | 0.50268300  | 2.52278100  | 2.09458200  |
| C | 1.24620300  | 3.35333000  | 1.22783200  |
| C | 0.87273000  | 3.40734900  | -0.17823500 |
| C | 2.08073000  | 3.51336100  | -0.97739500 |
| C | 2.15916500  | 2.85080500  | -2.21206000 |
| C | 3.37833300  | 2.14380400  | -2.57796700 |
| C | 2.99650200  | 0.93979400  | -3.30073800 |
| C | 3.72003500  | -0.24483700 | -3.11517700 |
| C | 4.45982100  | -2.47203200 | 0.74721300  |
| C | 3.72698900  | -2.33295800 | -2.01031300 |
| C | 4.58315000  | 1.90071300  | 1.88462900  |
| C | -2.40084200 | -2.79232200 | -0.66475900 |
| C | -3.47857900 | -2.09839700 | -0.10190500 |
| C | -1.11950000 | -1.98589300 | -0.52196600 |

|    |             |             |             |
|----|-------------|-------------|-------------|
| C  | -0.13772200 | -2.58585500 | 0.50882400  |
| O  | -3.15924600 | -0.88766300 | 0.40824400  |
| C  | -2.61943400 | -4.03299200 | -1.24381200 |
| C  | -4.77019000 | -2.62407800 | -0.10112200 |
| H  | -1.78972700 | -4.57124500 | -1.69605400 |
| H  | -5.58894100 | -2.05269400 | 0.32973400  |
| C  | -3.91122300 | -4.57997100 | -1.24555500 |
| C  | -4.98748700 | -3.88564200 | -0.67821200 |
| H  | -4.08295600 | -5.55624200 | -1.69595200 |
| C  | -6.37903900 | -4.48124400 | -0.67748400 |
| H  | -6.73066700 | -4.68965800 | 0.34263300  |
| H  | -7.11112900 | -3.79935700 | -1.12998800 |
| H  | -6.40987800 | -5.42381500 | -1.23658900 |
| C  | -6.69018500 | 3.16574900  | -0.16930500 |
| C  | -6.72593300 | 4.00352800  | -1.28079000 |
| C  | -5.74310700 | 3.89568800  | -2.27110100 |
| C  | -4.73262900 | 2.94371900  | -2.14225200 |
| C  | -4.70089700 | 2.09448700  | -1.03299300 |
| C  | -5.67642400 | 2.20468100  | -0.03424000 |
| H  | -7.46042600 | 3.23671700  | 0.59545300  |
| H  | -7.51794700 | 4.74365300  | -1.37570600 |
| H  | -5.76678700 | 4.55490000  | -3.13618400 |
| H  | -3.95563600 | 2.85541600  | -2.89661600 |
| H  | -3.89757400 | 1.36944000  | -0.92905100 |
| C  | -5.57212300 | 1.34277400  | 1.18514000  |
| H  | -4.75726200 | 0.62182400  | 1.12568300  |
| H  | -5.51670600 | 1.91489600  | 2.11111200  |
| Br | -7.23035100 | 0.22104300  | 1.46561300  |

#### IM4-1

-2 1

|   | x           | y           | z           |
|---|-------------|-------------|-------------|
| C | 0.32331500  | 0.95705000  | -1.22234100 |
| C | -0.89197800 | 1.59745200  | -0.88618800 |
| C | -1.30127800 | 1.84629700  | 0.44894800  |
| C | -0.47436100 | 1.26031800  | 1.51415300  |
| C | 0.07379300  | 0.14024300  | -2.36353000 |
| C | -1.30235500 | 0.35206300  | -2.82020700 |
| C | -1.91103600 | 1.26715800  | -1.89099100 |
| C | -3.24913200 | 1.12366400  | -1.52913600 |
| C | -2.67361100 | 1.63806900  | 0.80972000  |
| C | -1.36019600 | 0.75764800  | 2.54778100  |
| C | -1.03367500 | -0.39861700 | 3.26935800  |
| C | 0.18226000  | -1.10531800 | 2.95481000  |



|   |             |             |             |
|---|-------------|-------------|-------------|
| C | 1.00459400  | -0.62273800 | 1.92420500  |
| C | 1.62033900  | -1.54773600 | 0.98883000  |
| C | 1.72020600  | -0.90646600 | -0.29488300 |
| C | 1.46427700  | -1.65884900 | -1.42937600 |
| C | 0.66117100  | -1.12521100 | -2.54137100 |
| C | -2.04389800 | -0.69539500 | -3.36898500 |
| C | -1.45173300 | -2.01094600 | -3.50879900 |
| C | -0.12548100 | -2.20404300 | -3.06613000 |
| C | 0.20525600  | -3.41905100 | -2.32595400 |
| C | 1.18728900  | -3.07781800 | -1.32276500 |
| C | 1.16461900  | -3.71089000 | -0.07264200 |
| C | 1.38808300  | -2.92458300 | 1.11386700  |
| C | 0.50674200  | -3.42165600 | 2.16152000  |
| C | -0.08287200 | -2.53350200 | 3.05844000  |
| C | -2.71970700 | 0.98561300  | 2.11751200  |
| C | -3.59264500 | -3.52200600 | 2.46873700  |
| C | -4.15801700 | -2.24854400 | 2.59220300  |
| C | -4.97613400 | -1.70691700 | 1.51351700  |
| C | -5.20310600 | -2.46987700 | 0.36438000  |
| C | -4.60676900 | -3.78729400 | 0.23681000  |
| C | -2.59765400 | -5.02130700 | 0.95821900  |
| C | -1.60921400 | -4.67994500 | 1.96750200  |
| C | -2.22526400 | -3.75212600 | 2.90274700  |
| C | -1.47495400 | -2.70116100 | 3.43747200  |
| C | -2.06321200 | -1.37625600 | 3.56689800  |
| C | -3.37841900 | -1.15845200 | 3.14384300  |
| C | -4.72305000 | -0.28241500 | 1.41689700  |
| C | -4.66711500 | 0.33112800  | 0.15441400  |
| C | -4.90524700 | -0.46299400 | -1.04473600 |
| C | -5.16413800 | -1.83079400 | -0.94280200 |
| C | -4.54890200 | -2.75878000 | -1.87830500 |
| C | -4.20638200 | -3.96983400 | -1.14682300 |
| C | -3.02367200 | -4.65000800 | -1.44965400 |
| C | -2.20432100 | -5.19317300 | -0.37434600 |
| C | -0.26919900 | -4.51613900 | 1.60589100  |
| C | 0.14040700  | -4.69463400 | 0.22058700  |
| C | -0.81489100 | -5.01893900 | -0.74792300 |
| C | -0.77748200 | -4.37508200 | -2.05378900 |
| C | -2.14319300 | -4.16556200 | -2.49774900 |
| C | -2.46561500 | -2.99038700 | -3.19271100 |
| C | -3.70073700 | -2.28260000 | -2.87915200 |
| C | -3.43826900 | -0.85818800 | -2.99070300 |
| C | -4.02923700 | 0.03283900  | -2.09170100 |
| C | -3.71830300 | 0.05216500  | 2.40909800  |

|    |             |             |             |
|----|-------------|-------------|-------------|
| C  | -3.66216400 | 1.32045600  | -0.14981500 |
| C  | -3.82526100 | -4.31407800 | 1.27349200  |
| C  | 2.58793100  | 1.59626700  | -0.19286200 |
| C  | 3.95926800  | 1.25718500  | -0.14341000 |
| C  | 1.39187700  | 0.60633600  | -0.17396200 |
| C  | 0.70873200  | 0.59635900  | 1.22880000  |
| O  | 4.31668500  | -0.06610800 | -0.12087800 |
| C  | 2.26984500  | 2.96222100  | -0.22050400 |
| C  | 4.93459200  | 2.27124800  | -0.12289600 |
| H  | 1.22134300  | 3.24147000  | -0.26972600 |
| H  | 5.99456000  | 2.02906500  | -0.08229100 |
| C  | 3.23506500  | 3.96408800  | -0.19532200 |
| C  | 4.59071100  | 3.62275800  | -0.14434800 |
| H  | 2.93018600  | 5.00947300  | -0.21735000 |
| C  | 5.68991600  | 4.66225000  | -0.11360600 |
| H  | 5.66928100  | 5.29300200  | -1.01359000 |
| H  | 5.57988200  | 5.33432500  | 0.74899800  |
| H  | 6.67277700  | 4.18128100  | -0.05347400 |
| C  | 6.03424700  | -1.80322000 | -0.14237600 |
| C  | 5.06590000  | -2.80039600 | -0.27005300 |
| C  | 7.38835800  | -2.16600100 | -0.03757600 |
| C  | 5.43867600  | -4.14821900 | -0.28552900 |
| H  | 4.02368100  | -2.52183500 | -0.36139300 |
| C  | 7.75459700  | -3.51011600 | -0.05701400 |
| H  | 8.13329100  | -1.37430200 | 0.05103700  |
| C  | 6.78148700  | -4.50859000 | -0.17863100 |
| H  | 4.66973400  | -4.91179900 | -0.38148900 |
| H  | 8.80569100  | -3.78077600 | 0.02476400  |
| H  | 7.07047100  | -5.55811900 | -0.19043400 |
| Br | 8.69188700  | 1.63160200  | 0.06703400  |
| C  | 5.72827700  | -0.32795800 | -0.13034800 |
| H  | 6.19098000  | 0.14976500  | -1.00266900 |
| H  | 6.20890200  | 0.14001300  | 0.73624100  |
| C  | -2.00818500 | 7.19354300  | -1.35823200 |
| C  | -2.68051300 | 7.49028300  | -2.54101100 |
| C  | -3.61412300 | 6.58811800  | -3.06004600 |
| C  | -3.87010000 | 5.39252400  | -2.38817100 |
| C  | -3.19908100 | 5.09676300  | -1.20051300 |
| C  | -2.25896900 | 5.99334400  | -0.67679800 |
| H  | -1.28424500 | 7.89540700  | -0.95063800 |
| H  | -2.47273400 | 8.42148400  | -3.06278800 |
| H  | -4.13352300 | 6.81515600  | -3.98805800 |
| H  | -4.58437500 | 4.67896400  | -2.78983500 |
| H  | -3.39760500 | 4.16143700  | -0.68467900 |

|    |             |            |            |
|----|-------------|------------|------------|
| C  | -1.51355900 | 5.65776100 | 0.57324700 |
| H  | -1.61360700 | 4.61297300 | 0.86316400 |
| H  | -0.46246200 | 5.93996300 | 0.53589000 |
| Br | -2.21577900 | 6.69929900 | 2.15274400 |

**IM4**

-2 1

|   | x           | y           | z           |
|---|-------------|-------------|-------------|
| C | 1.03734300  | 1.42466800  | 1.32298100  |
| C | 1.28561000  | 0.05806100  | 1.56386300  |
| C | 1.61051900  | -0.87549100 | 0.52969200  |
| C | 1.50581800  | -0.37543100 | -0.84265300 |
| C | -0.01412200 | 1.84750000  | 2.20316700  |
| C | -0.36668400 | 0.74241300  | 3.08054700  |
| C | 0.43892800  | -0.38635000 | 2.67210400  |
| C | -0.08977700 | -1.67629100 | 2.70182500  |
| C | 1.00445800  | -2.17687900 | 0.54716800  |
| C | 0.92996800  | -1.42089200 | -1.67597300 |
| C | 0.09951000  | -1.09064100 | -2.75434900 |
| C | -0.19814700 | 0.29269000  | -3.02904000 |
| C | 0.32102500  | 1.28943900  | -2.16893900 |
| C | -0.45204600 | 2.44464100  | -1.81190000 |
| C | 0.06509700  | 3.06571700  | -0.52146800 |
| C | -1.05432000 | 3.27204900  | 0.44335400  |
| C | -1.02354700 | 2.73258300  | 1.77720200  |
| C | -1.68427800 | 0.54398100  | 3.52178200  |
| C | -2.72172200 | 1.45714000  | 3.08746700  |
| C | -2.38658000 | 2.52211600  | 2.23421700  |
| C | -3.25516900 | 2.86384600  | 1.12827700  |
| C | -2.40887800 | 3.29939500  | 0.02297700  |
| C | -2.81613400 | 3.00860800  | -1.30792300 |
| C | -1.78480800 | 2.52008400  | -2.20966700 |
| C | -2.35715500 | 1.47147000  | -3.04414200 |
| C | -1.57807800 | 0.38435400  | -3.44843700 |
| C | 0.60716200  | -2.53438800 | -0.81621600 |
| C | -3.79184800 | -2.26913600 | -2.15306500 |
| C | -2.78708600 | -3.15145500 | -1.73724600 |
| C | -2.75317800 | -3.63231900 | -0.36026500 |
| C | -3.73637400 | -3.19594700 | 0.53953400  |
| C | -4.77541500 | -2.28339800 | 0.10849700  |
| C | -5.11967000 | -0.43668400 | -1.50010100 |
| C | -4.27454600 | -0.01291800 | -2.60225500 |
| C | -3.46050800 | -1.14931000 | -3.01380000 |
| C | -2.14207600 | -0.95405900 | -3.43633100 |

|   |             |             |             |
|---|-------------|-------------|-------------|
| C | -1.09846800 | -1.87051500 | -3.00427100 |
| C | -1.41853500 | -2.94502400 | -2.16637700 |
| C | -1.37128900 | -3.73520000 | 0.05531400  |
| C | -1.00027800 | -3.37217900 | 1.36775800  |
| C | -2.02589000 | -2.92381800 | 2.30342600  |
| C | -3.35942200 | -2.84050100 | 1.89991400  |
| C | -4.17554400 | -1.70919400 | 2.31482200  |
| C | -5.04522500 | -1.36048400 | 1.19981400  |
| C | -5.32921700 | -0.02003000 | 0.93171300  |
| C | -5.36438900 | 0.46251200  | -0.44470500 |
| C | -3.72404600 | 1.27269400  | -2.61866600 |
| C | -3.98986500 | 2.21340000  | -1.52870300 |
| C | -4.81707200 | 1.79677900  | -0.46347000 |
| C | -4.42448800 | 2.13613400  | 0.89746000  |
| C | -4.76797000 | 1.02725500  | 1.76903900  |
| C | -3.92295000 | 0.69168800  | 2.83655300  |
| C | -3.62687400 | -0.70593300 | 3.11572400  |
| C | -2.23719600 | -0.79248300 | 3.53934100  |
| C | -1.45421600 | -1.88783700 | 3.14856400  |
| C | -0.54562100 | -3.29270800 | -1.05125700 |
| C | 0.19596500  | -2.61448800 | 1.62095400  |
| C | -4.81506000 | -1.82349900 | -1.21725600 |
| C | 2.47660300  | 2.97534500  | -0.14630900 |
| C | 2.08602000  | 4.23805100  | -0.61321300 |
| C | 1.26139100  | 2.06697600  | -0.03877800 |
| C | 1.23023800  | 0.95856500  | -1.11339600 |
| O | 0.76442800  | 4.37641800  | -0.83174700 |
| C | 3.81315500  | 2.73221000  | 0.13148100  |
| C | 3.01574100  | 5.25897500  | -0.81363100 |
| H | 4.13748200  | 1.76159400  | 0.49804100  |
| H | 2.68327600  | 6.22883800  | -1.17689200 |
| C | 4.75767300  | 3.75089100  | -0.06821300 |
| C | 4.37031600  | 5.01174200  | -0.53769300 |
| H | 5.80712700  | 3.55600000  | 0.14485200  |
| C | 5.39363300  | 6.10879800  | -0.74024100 |
| H | 5.35619300  | 6.51634600  | -1.75981700 |
| H | 5.22773400  | 6.95302600  | -0.05586900 |
| H | 6.41117000  | 5.73990000  | -0.56712700 |
| C | 6.43859100  | -3.63761100 | 0.10654500  |
| C | 6.72558900  | -4.50357500 | -0.94567300 |
| C | 5.92633500  | -4.49758700 | -2.09325600 |
| C | 4.84504600  | -3.62011100 | -2.17906200 |
| C | 4.55862100  | -2.74942600 | -1.12570800 |
| C | 5.35201500  | -2.75322000 | 0.02903500  |

|    |            |             |             |
|----|------------|-------------|-------------|
| H  | 7.06398900 | -3.63337500 | 0.99682500  |
| H  | 7.56975600 | -5.18591700 | -0.87147600 |
| H  | 6.14554600 | -5.17711800 | -2.91389700 |
| H  | 4.21238100 | -3.61163800 | -3.06248000 |
| H  | 3.71178100 | -2.07293000 | -1.19426400 |
| C  | 5.01671000 | -1.84983200 | 1.17141200  |
| H  | 4.03928400 | -1.37562000 | 1.06970500  |
| H  | 5.10405000 | -2.33866000 | 2.14108200  |
| Br | 6.32785400 | -0.32192400 | 1.31217200  |

**IM5**

-2 1

|   | x           | y           | z           |
|---|-------------|-------------|-------------|
| C | -0.81795800 | -0.79886000 | -2.08062600 |
| C | 0.22925700  | -1.53339200 | -2.67242400 |
| C | 0.73229000  | -2.75396900 | -2.14231700 |
| C | 0.21431900  | -3.14903000 | -0.83258100 |
| C | -0.49405000 | 0.59132200  | -2.21425500 |
| C | 0.71347300  | 0.72621900  | -3.03071700 |
| C | 1.17768900  | -0.60486700 | -3.30365500 |
| C | 2.54352100  | -0.88345200 | -3.34315300 |
| C | 2.14112200  | -2.98994100 | -2.13374800 |
| C | 1.30900900  | -3.69679000 | -0.05300200 |
| C | 1.36573300  | -3.51381100 | 1.33336400  |
| C | 0.33936600  | -2.73541900 | 1.97884300  |
| C | -0.68486000 | -2.16358800 | 1.19429200  |
| C | -1.17273300 | -0.84772800 | 1.47749300  |
| C | -1.92517200 | -0.26670600 | 0.28849000  |
| C | -1.60756500 | 1.29056500  | 0.01966400  |
| C | -0.75925400 | 1.54804000  | -1.23946600 |
| C | 1.62269100  | 1.76479600  | -2.81207500 |
| C | 1.36670500  | 2.72629100  | -1.77023600 |
| C | 0.20329500  | 2.56888500  | -0.98912000 |
| C | 0.25998300  | 2.80481800  | 0.44548700  |
| C | -0.68294500 | 1.92914100  | 1.07913300  |
| C | -0.33343400 | 1.33583200  | 2.27532400  |
| C | -0.59670100 | -0.10358600 | 2.48152300  |
| C | 0.49050900  | -0.64913500 | 3.26334100  |
| C | 0.94972600  | -1.94833800 | 3.02216900  |
| C | 2.50859300  | -3.59786400 | -0.85333200 |
| C | 4.49348300  | -1.09422400 | 2.46439100  |
| C | 4.73895200  | -2.02605100 | 1.44848500  |
| C | 5.26539900  | -1.58254800 | 0.16403000  |
| C | 5.54090500  | -0.22555100 | -0.04276900 |

|   |             |             |             |
|---|-------------|-------------|-------------|
| C | 5.27810600  | 0.73766800  | 1.00826000  |
| C | 3.73338100  | 1.08616700  | 2.89608200  |
| C | 2.81045200  | 0.15259500  | 3.52390500  |
| C | 3.28706000  | -1.19769100 | 3.26250400  |
| C | 2.37373900  | -2.22847900 | 3.02162600  |
| C | 2.63165600  | -3.20052100 | 1.96971500  |
| C | 3.79069000  | -3.09181900 | 1.19482400  |
| C | 4.66188700  | -2.38512400 | -0.88012600 |
| C | 4.29937300  | -1.78598300 | -2.09884900 |
| C | 4.58472400  | -0.36921600 | -2.31656600 |
| C | 5.18988600  | 0.39063700  | -1.31378900 |
| C | 4.72251700  | 1.74043900  | -1.04452700 |
| C | 4.77913000  | 1.95467600  | 0.39413200  |
| C | 3.77761900  | 2.69879900  | 1.02560600  |
| C | 3.24753300  | 2.26176600  | 2.31109800  |
| C | 1.43978300  | 0.41945700  | 3.51627000  |
| C | 0.92843400  | 1.63783400  | 2.91135800  |
| C | 1.82480400  | 2.53858300  | 2.31701300  |
| C | 1.47779600  | 3.14305400  | 1.05288800  |
| C | 2.68717000  | 3.26309300  | 0.25337100  |
| C | 2.62371900  | 3.03969700  | -1.12604000 |
| C | 3.67060800  | 2.27651300  | -1.78969400 |
| C | 3.04635000  | 1.48719400  | -2.83932700 |
| C | 3.49655200  | 0.18808700  | -3.09452100 |
| C | 3.73192700  | -3.30336400 | -0.24660000 |
| C | 3.05853200  | -2.10609800 | -2.75360200 |
| C | 4.77564900  | 0.31691500  | 2.24866700  |
| C | -3.04003800 | -1.79216600 | -1.23655700 |
| C | -3.93807000 | -1.25330900 | -0.32194000 |
| C | -1.62886500 | -1.33091700 | -0.91660800 |
| C | -0.78640500 | -2.41756400 | -0.20832700 |
| O | -3.34133600 | -0.41479900 | 0.59199100  |
| C | -3.51218200 | -2.63480500 | -2.23763200 |
| C | -5.30498400 | -1.52368000 | -0.34319200 |
| H | -2.82452000 | -3.05646300 | -2.96740600 |
| H | -6.00100400 | -1.09430800 | 0.37913400  |
| C | -4.87771300 | -2.92266500 | -2.28573800 |
| C | -5.77950500 | -2.38146000 | -1.34958600 |
| H | -5.25864800 | -3.58137300 | -3.06492600 |
| C | -7.25417500 | -2.71358100 | -1.42939100 |
| H | -7.41253700 | -3.79840600 | -1.34512100 |
| H | -7.82440000 | -2.21509600 | -0.63342800 |
| H | -7.67007400 | -2.40725500 | -2.40010900 |
| C | -2.84587500 | 4.47500600  | 0.71320300  |

|    |             |             |             |
|----|-------------|-------------|-------------|
| C  | -2.79220700 | 5.84819200  | 0.47050700  |
| C  | -2.78077400 | 6.32865500  | -0.84009200 |
| C  | -2.82584600 | 5.42385100  | -1.90219800 |
| C  | -2.87910300 | 4.05193100  | -1.65291500 |
| C  | -2.88650100 | 3.55312800  | -0.34244900 |
| H  | -2.85873200 | 4.10748000  | 1.73639600  |
| H  | -2.76339100 | 6.54271600  | 1.30723000  |
| H  | -2.74141300 | 7.39877100  | -1.03187000 |
| H  | -2.82145400 | 5.78524700  | -2.92817100 |
| H  | -2.91558500 | 3.35238300  | -2.48393800 |
| C  | -2.98032500 | 2.06731800  | -0.07228000 |
| H  | -3.56989900 | 1.59419100  | -0.86300000 |
| H  | -3.52474200 | 1.89897600  | 0.85912400  |
| Br | -8.70771600 | -0.75976300 | 1.47068500  |

**IM6**

-2 1

|   | x           | y           | z           |
|---|-------------|-------------|-------------|
| C | 1.26570300  | 1.05546600  | 1.27873900  |
| C | 1.29874000  | -0.28751600 | 1.59728400  |
| C | 1.69355400  | -1.39882300 | 0.63266500  |
| C | 1.49833600  | -0.84704600 | -0.80038600 |
| C | 0.34355800  | 1.74430700  | 2.17692900  |
| C | -0.21353300 | 0.76002900  | 3.06565400  |
| C | 0.37445000  | -0.51809800 | 2.69548300  |
| C | -0.38469700 | -1.67925300 | 2.78562300  |
| C | 0.58902400  | -2.48230800 | 0.64782600  |
| C | 0.69763300  | -1.76703000 | -1.57073500 |
| C | -0.04955400 | -1.34701700 | -2.67589700 |
| C | -0.08391400 | 0.05473600  | -3.00028900 |
| C | 0.61522900  | 0.96167600  | -2.18000500 |
| C | 0.06522400  | 2.24721300  | -1.87240100 |
| C | 0.68722900  | 2.81819900  | -0.60525100 |
| C | -0.39015100 | 3.25760100  | 0.33946800  |
| C | -0.47826800 | 2.76108800  | 1.67305200  |
| C | -1.54823500 | 0.81867400  | 3.49495200  |
| C | -2.39527000 | 1.89239500  | 3.00371200  |
| C | -1.87265200 | 2.84266700  | 2.12784800  |
| C | -2.64741100 | 3.30673500  | 1.00676000  |
| C | -1.71512100 | 3.52096300  | -0.10169700 |
| C | -2.15394900 | 3.26872200  | -1.42094200 |
| C | -1.22223100 | 2.56188400  | -2.29485000 |
| C | -1.97667800 | 1.61356800  | -3.09153800 |
| C | -1.41277400 | 0.38501700  | -3.45307300 |
| C | 0.14882100  | -2.77519600 | -0.68216400 |

|   |             |             |             |
|---|-------------|-------------|-------------|
| C | -4.10315300 | -1.75665100 | -2.11168600 |
| C | -3.28774800 | -2.79800600 | -1.65079600 |
| C | -3.36252100 | -3.22551500 | -0.26231900 |
| C | -4.23861900 | -2.57608900 | 0.61355300  |
| C | -5.09085800 | -1.50390400 | 0.13804600  |
| C | -5.06382200 | 0.31676900  | -1.53847200 |
| C | -4.14427800 | 0.53305600  | -2.64137800 |
| C | -3.55845600 | -0.74969000 | -3.00267900 |
| C | -2.21951400 | -0.82020100 | -3.40273700 |
| C | -1.37256200 | -1.89814600 | -2.91820300 |
| C | -1.89878400 | -2.86848600 | -2.06317700 |
| C | -2.01756700 | -3.55114900 | 0.17832700  |
| C | -1.60319500 | -3.22002100 | 1.47508700  |
| C | -2.52059800 | -2.55738200 | 2.38572200  |
| C | -3.81724300 | -2.25084200 | 1.96863700  |
| C | -4.41271100 | -0.97362100 | 2.33207700  |
| C | -5.19159200 | -0.50876800 | 1.19364200  |
| C | -5.22328400 | 0.84950400  | 0.87308600  |
| C | -5.14126400 | 1.27569600  | -0.51620500 |
| C | -3.36183600 | 1.69085000  | -2.68882100 |
| C | -3.45651300 | 2.69747500  | -1.63118400 |
| C | -4.36115500 | 2.49288000  | -0.57206500 |
| C | -3.93002100 | 2.80522200  | 0.77973300  |
| C | -4.47349700 | 1.80104800  | 1.67887100  |
| C | -3.72361100 | 1.35544600  | 2.77014600  |
| C | -3.68649800 | -0.06210400 | 3.10024300  |
| C | -2.34082000 | -0.38374100 | 3.55088500  |
| C | -1.76347600 | -1.61949800 | 3.20278100  |
| C | -1.11746800 | -3.32942200 | -0.92692700 |
| C | -0.28105300 | -2.67990500 | 1.70332700  |
| C | -5.02080900 | -1.09309400 | -1.19914500 |
| C | 3.02425600  | 2.31116900  | -0.14235300 |
| C | 2.86953500  | 3.59640500  | -0.67184900 |
| C | 1.66506200  | 1.62528200  | -0.07008700 |
| C | 1.44765500  | 0.49828000  | -1.10017500 |
| O | 1.58374200  | 3.94638500  | -0.94779500 |
| C | 4.29312700  | 1.86063500  | 0.19212000  |
| C | 3.95414500  | 4.44063500  | -0.88356200 |
| H | 4.49216500  | 0.87694200  | 0.60884300  |
| H | 3.79485300  | 5.43367000  | -1.29768500 |
| C | 5.39694300  | 2.69726900  | -0.01724500 |
| C | 5.24087600  | 3.98105000  | -0.55090600 |
| H | 6.37312300  | 2.29390700  | 0.24275100  |
| C | 6.44122000  | 4.87604900  | -0.77233900 |



|    |            |             |             |
|----|------------|-------------|-------------|
| H  | 6.54132800 | 5.16777900  | -1.82734600 |
| H  | 6.36723300 | 5.80654100  | -0.19169000 |
| H  | 7.36578400 | 4.37025700  | -0.47625600 |
| C  | 3.08398900 | -4.34553700 | -0.05941100 |
| C  | 3.58995300 | -5.29591200 | -0.94765700 |
| C  | 4.67622600 | -4.97857600 | -1.76559400 |
| C  | 5.25821500 | -3.71364600 | -1.66926100 |
| C  | 4.75011200 | -2.76026900 | -0.78393000 |
| C  | 3.64005700 | -3.05889500 | 0.02165200  |
| H  | 2.24730500 | -4.60836300 | 0.58264400  |
| H  | 3.13715100 | -6.28472700 | -0.99569900 |
| H  | 5.07498900 | -5.71774000 | -2.45862900 |
| H  | 6.12727600 | -3.46457500 | -2.27443800 |
| H  | 5.26603800 | -1.81029100 | -0.65114600 |
| C  | 3.10391700 | -2.01340900 | 0.98258200  |
| H  | 3.84479400 | -1.21375800 | 1.08257500  |
| H  | 2.99507600 | -2.45166800 | 1.98349500  |
| Br | 6.83999900 | -0.49298300 | 1.17463600  |

**IM7**

-2 1

|   | x           | y           | z           |
|---|-------------|-------------|-------------|
| C | 0.59599500  | -1.39586100 | 2.39959700  |
| C | 1.43943000  | -0.61994700 | 3.22067500  |
| C | 1.27425800  | 0.77896100  | 3.41965800  |
| C | 0.26299200  | 1.43275400  | 2.58991900  |
| C | 1.42202100  | -2.34612800 | 1.71485000  |
| C | 2.78917000  | -2.25188500 | 2.22867500  |
| C | 2.80554200  | -1.15833100 | 3.15908800  |
| C | 3.91656500  | -0.32034500 | 3.24524900  |
| C | 2.42386300  | 1.62747200  | 3.43953300  |
| C | 0.77891500  | 2.72198700  | 2.16699300  |
| C | 0.45377700  | 3.24922000  | 0.91238600  |
| C | -0.37549900 | 2.47732600  | 0.02107100  |
| C | -0.81927600 | 1.20034700  | 0.43045100  |
| C | -0.86199900 | 0.11116500  | -0.49812600 |
| C | -0.93533400 | -1.22790500 | 0.22111700  |
| C | -0.01362900 | -2.37146500 | -0.44234300 |
| C | 1.22253000  | -2.74472400 | 0.39666700  |
| C | 3.89010000  | -2.50091000 | 1.40474500  |
| C | 3.67997600  | -2.86656900 | 0.02735900  |
| C | 2.35417100  | -2.93976600 | -0.44780500 |
| C | 2.03341400  | -2.43002400 | -1.77206300 |
| C | 0.69106000  | -1.92605300 | -1.74240200 |

|   |             |             |             |
|---|-------------|-------------|-------------|
| C | 0.40475300  | -0.76513300 | -2.43146400 |
| C | -0.40733200 | 0.28648500  | -1.78459800 |
| C | 0.10204000  | 1.57059900  | -2.21072800 |
| C | 0.11439100  | 2.65311000  | -1.32499100 |
| C | 2.12140700  | 2.84691600  | 2.68784300  |
| C | 3.70794500  | 3.43141000  | -1.59538800 |
| C | 3.91178800  | 3.78035400  | -0.25504100 |
| C | 4.94127700  | 3.10586400  | 0.52503600  |
| C | 5.73521100  | 2.12216700  | -0.07551200 |
| C | 5.51703600  | 1.75833900  | -1.46179700 |
| C | 3.68718100  | 1.63384600  | -3.10737800 |
| C | 2.34255000  | 2.18655300  | -3.04204100 |
| C | 2.35898600  | 3.30593900  | -2.11156600 |
| C | 1.26420800  | 3.53673900  | -1.27306200 |
| C | 1.47547600  | 3.90583000  | 0.11831100  |
| C | 2.77809700  | 4.01505900  | 0.61550900  |
| C | 4.45499900  | 2.94312700  | 1.88013100  |
| C | 4.73937700  | 1.76155300  | 2.58530900  |
| C | 5.56689900  | 0.73204600  | 1.95935900  |
| C | 6.05214300  | 0.90847400  | 0.66235000  |
| C | 6.04141400  | -0.20262300 | -0.27469200 |
| C | 5.71106300  | 0.32532800  | -1.59043700 |
| C | 4.89874700  | -0.41734500 | -2.45302100 |
| C | 3.86867800  | 0.25135200  | -3.23777500 |
| C | 1.23801800  | 1.33383800  | -3.08251900 |
| C | 1.41855100  | -0.10161200 | -3.21876400 |
| C | 2.71705000  | -0.62747000 | -3.29119700 |
| C | 3.03073900  | -1.82721000 | -2.55204500 |
| C | 4.38946500  | -1.71324700 | -2.04492400 |
| C | 4.69147800  | -2.21004200 | -0.77266800 |
| C | 5.54708900  | -1.44626600 | 0.12373100  |
| C | 5.04880000  | -1.63101500 | 1.47701000  |
| C | 5.05865300  | -0.55945700 | 2.37539000  |
| C | 3.10824800  | 3.48415200  | 1.93214100  |
| C | 3.74269300  | 1.11280000  | 3.39647200  |
| C | 4.53074800  | 2.40671300  | -2.21933600 |
| C | -1.97728200 | -1.31249500 | 2.41345800  |
| C | -2.86310000 | -1.71763900 | 1.42070500  |
| C | -0.67524500 | -0.84371900 | 1.78836000  |
| C | -0.55183000 | 0.69734100  | 1.74110400  |
| O | -2.32999500 | -1.64661200 | 0.15609500  |
| C | -2.37919700 | -1.35833200 | 3.74361900  |
| C | -4.15561900 | -2.16144800 | 1.68890100  |
| H | -1.69668100 | -1.04916200 | 4.53197600  |

|    |             |             |             |
|----|-------------|-------------|-------------|
| H  | -4.84900700 | -2.44873700 | 0.89870600  |
| C  | -3.66931600 | -1.80368000 | 4.04352100  |
| C  | -4.56324200 | -2.20335200 | 3.03358700  |
| H  | -3.99600300 | -1.83837200 | 5.08147700  |
| C  | -5.94721300 | -2.70336100 | 3.38472000  |
| H  | -6.36959800 | -2.13359800 | 4.22288400  |
| H  | -6.62510900 | -2.63948100 | 2.52360800  |
| H  | -5.91196200 | -3.75732200 | 3.69810400  |
| C  | -0.19426800 | -5.02660500 | -2.69837900 |
| C  | 0.41660600  | -6.14447700 | -3.26809700 |
| C  | 1.01947400  | -7.10488200 | -2.45381300 |
| C  | 1.00381600  | -6.93664200 | -1.06806300 |
| C  | 0.39126000  | -5.81672400 | -0.50443300 |
| C  | -0.21580300 | -4.84156200 | -1.30877700 |
| H  | -0.66415000 | -4.28282100 | -3.33729500 |
| H  | 0.41851900  | -6.26562500 | -4.34905300 |
| H  | 1.49486200  | -7.97819200 | -2.89509300 |
| H  | 1.46845700  | -7.67878500 | -0.42264000 |
| H  | 0.38279700  | -5.69049000 | 0.57508500  |
| C  | -0.91237600 | -3.64574800 | -0.69699400 |
| H  | -1.34568900 | -3.93538200 | 0.26495000  |
| H  | -1.74735700 | -3.34523300 | -1.33331400 |
| Br | -7.63308800 | -2.64493500 | -0.02348200 |
| C  | -6.21101100 | 2.76233300  | -2.34018700 |
| C  | -7.11437200 | 1.70681200  | -2.45371400 |
| C  | -7.06936200 | 0.64256700  | -1.54799500 |
| C  | -6.12184400 | 0.64366300  | -0.52217200 |
| C  | -5.22096100 | 1.70120400  | -0.40453700 |
| C  | -5.25045600 | 2.76776600  | -1.31669200 |
| H  | -6.24448000 | 3.59349900  | -3.04281300 |
| H  | -7.84888100 | 1.71075400  | -3.25700200 |
| H  | -7.73656800 | -0.21492200 | -1.60816100 |
| H  | -6.11443800 | -0.20682500 | 0.15454400  |
| H  | -4.47253800 | 1.69307500  | 0.38509700  |
| C  | -4.24893800 | 3.86238200  | -1.22706800 |
| H  | -3.40787900 | 3.63101300  | -0.57604500 |
| H  | -3.89437500 | 4.21246900  | -2.19514000 |
| Br | -5.01736200 | 5.57172500  | -0.41619300 |

**IM8**

-2 1

|   | x           | y          | z          |
|---|-------------|------------|------------|
| C | -0.05605200 | 1.11923200 | 1.57270900 |
| C | 1.21171800  | 1.66006400 | 1.63362300 |

|   |             |             |             |
|---|-------------|-------------|-------------|
| C | 1.89136600  | 2.41306000  | 0.49722700  |
| C | 1.18903700  | 1.98524800  | -0.81449400 |
| C | -0.16800100 | 0.03406300  | 2.54411500  |
| C | 1.10287900  | -0.08763600 | 3.20734100  |
| C | 1.97413500  | 0.92303200  | 2.62995700  |
| C | 3.32801200  | 0.65531600  | 2.46637200  |
| C | 3.28780700  | 1.79235300  | 0.26059200  |
| C | 2.17567900  | 1.56107400  | -1.77755100 |
| C | 1.86191600  | 0.67831600  | -2.81590100 |
| C | 0.53940700  | 0.11340400  | -2.87262800 |
| C | -0.38740200 | 0.44812000  | -1.86664400 |
| C | -1.29132900 | -0.53304100 | -1.34629300 |
| C | -1.79781200 | -0.13122400 | 0.03048500  |
| C | -1.62590400 | -1.26424400 | 0.99535500  |
| C | -0.88275900 | -1.12081800 | 2.20721000  |
| C | 1.62745800  | -1.33391100 | 3.58206000  |
| C | 0.87374800  | -2.53405700 | 3.26474100  |
| C | -0.35201400 | -2.43004000 | 2.60704400  |
| C | -0.69744600 | -3.35454900 | 1.55874400  |
| C | -1.44775200 | -2.60436800 | 0.55086200  |
| C | -1.30806900 | -2.95790500 | -0.80894700 |
| C | -1.17964700 | -1.85685900 | -1.75863500 |
| C | -0.19008800 | -2.22695200 | -2.75213000 |
| C | 0.64764300  | -1.25625200 | -3.31232600 |
| C | 3.46483400  | 1.45459400  | -1.11896700 |
| C | 3.84942100  | -2.91052600 | -2.51531500 |
| C | 4.58000700  | -1.75216100 | -2.22368600 |
| C | 5.26043100  | -1.61986100 | -0.94434600 |
| C | 5.16382400  | -2.64831100 | -0.00138200 |
| C | 4.41578900  | -3.85310300 | -0.30372300 |
| C | 2.43201500  | -4.55772700 | -1.60487800 |
| C | 1.68365700  | -3.81966200 | -2.60728800 |
| C | 2.56224100  | -2.80846600 | -3.17644500 |
| C | 2.05225200  | -1.55288500 | -3.52443500 |
| C | 2.80846800  | -0.35051500 | -3.21503800 |
| C | 4.04909100  | -0.45028600 | -2.58180500 |
| C | 5.13824900  | -0.23846700 | -0.51407400 |
| C | 4.93121000  | 0.06177600  | 0.83843000  |
| C | 4.84531700  | -1.00869100 | 1.81668700  |
| C | 4.96875800  | -2.33756100 | 1.40744400  |
| C | 4.09906700  | -3.35481100 | 1.97813500  |
| C | 3.75053500  | -4.28560800 | 0.91453200  |
| C | 2.46739500  | -4.83152400 | 0.85388300  |
| C | 1.78520900  | -4.95686100 | -0.42560800 |

|    |             |             |             |
|----|-------------|-------------|-------------|
| C  | 0.33181100  | -3.52804400 | -2.40229500 |
| C  | -0.34516600 | -3.95970200 | -1.17984800 |
| C  | 0.37813600  | -4.68889000 | -0.21795100 |
| C  | 0.19197500  | -4.36364500 | 1.18552000  |
| C  | 1.47751000  | -4.46546600 | 1.85501200  |
| C  | 1.81093300  | -3.57246900 | 2.87588100  |
| C  | 3.14840700  | -3.00002100 | 2.93636300  |
| C  | 3.02570300  | -1.61836700 | 3.37689300  |
| C  | 3.86690700  | -0.63266500 | 2.82743300  |
| C  | 4.39239700  | 0.47977600  | -1.51828700 |
| C  | 3.99233100  | 1.09247400  | 1.22139400  |
| C  | 3.76192500  | -3.98206400 | -1.53560100 |
| C  | -2.11870800 | 2.24234800  | 0.49162600  |
| C  | -3.33279700 | 1.61764000  | 0.19852200  |
| C  | -0.98012600 | 1.23730900  | 0.37401100  |
| C  | -0.07140500 | 1.42621700  | -0.85818200 |
| O  | -3.22887800 | 0.27706900  | -0.06051600 |
| C  | -2.10907300 | 3.59792200  | 0.79007000  |
| C  | -4.53962200 | 2.30648900  | 0.18134600  |
| H  | -1.20573200 | 4.15351600  | 1.02706500  |
| H  | -5.46154600 | 1.78983600  | -0.07526100 |
| C  | -3.31377700 | 4.31066700  | 0.77998200  |
| C  | -4.52634300 | 3.68146700  | 0.47701700  |
| H  | -3.25345700 | 5.37429900  | 0.99952300  |
| C  | -5.82041100 | 4.46582200  | 0.46248700  |
| H  | -6.31545300 | 4.41031000  | -0.51666400 |
| H  | -6.53624600 | 4.08002000  | 1.20158200  |
| H  | -5.64021800 | 5.52150800  | 0.68920300  |
| C  | 3.94810800  | 4.76566700  | -0.64814300 |
| C  | 4.47242400  | 5.56484900  | -1.66522700 |
| C  | 3.64147100  | 6.44679700  | -2.35906100 |
| C  | 2.29291500  | 6.53333200  | -2.00997200 |
| C  | 1.76585900  | 5.73099100  | -0.99530000 |
| C  | 2.58582400  | 4.81901500  | -0.31241600 |
| H  | 4.60802200  | 4.09472400  | -0.10441500 |
| H  | 5.53118800  | 5.50082500  | -1.91006000 |
| H  | 4.04719500  | 7.07273400  | -3.15222600 |
| H  | 1.64164100  | 7.24226300  | -2.51657900 |
| H  | 0.73715700  | 5.87354400  | -0.66606900 |
| C  | 1.99893500  | 3.95979600  | 0.79317000  |
| H  | 1.01638900  | 4.35822100  | 1.06544300  |
| H  | 2.61988400  | 4.04335700  | 1.69495700  |
| Br | -0.74330200 | 6.86850600  | 1.39942300  |
| C  | -7.18646200 | -3.32044600 | -0.36771500 |

|    |             |             |             |
|----|-------------|-------------|-------------|
| C  | -7.36437700 | -4.28807800 | 0.61669700  |
| C  | -6.51089800 | -4.32348600 | 1.72492300  |
| C  | -5.48661800 | -3.38459700 | 1.84022300  |
| C  | -5.31133000 | -2.40717000 | 0.85708900  |
| C  | -6.15704100 | -2.37259100 | -0.25798800 |
| H  | -7.85551200 | -3.28231500 | -1.22468500 |
| H  | -8.16527100 | -5.01805700 | 0.52111900  |
| H  | -6.64498000 | -5.08341600 | 2.49142500  |
| H  | -4.81185900 | -3.40893400 | 2.69154000  |
| H  | -4.50517300 | -1.68392300 | 0.94210000  |
| C  | -5.91814000 | -1.36804500 | -1.34016400 |
| H  | -5.04824100 | -0.74034500 | -1.15327400 |
| H  | -5.87059000 | -1.81442500 | -2.33265100 |
| Br | -7.45125900 | -0.06684600 | -1.50179600 |

**P1**

-2 1

|   | x           | y           | z           |
|---|-------------|-------------|-------------|
| C | -0.71251000 | 0.90848100  | 1.18428700  |
| C | 0.37150600  | 1.69179500  | 1.44682300  |
| C | 0.92253700  | 2.74290000  | 0.49784700  |
| C | 0.43158600  | 2.38279800  | -0.91913500 |
| C | -0.60920100 | -0.32486500 | 1.96603800  |
| C | 0.58922100  | -0.23983300 | 2.76907700  |
| C | 1.21584600  | 1.04500100  | 2.47644400  |
| C | 2.61109300  | 1.08168000  | 2.35350400  |
| C | 2.44418300  | 2.51699500  | 0.32365300  |
| C | 1.54714900  | 2.34258000  | -1.82705100 |
| C | 1.51106000  | 1.58398400  | -3.00228600 |
| C | 0.36198600  | 0.75691500  | -3.25177500 |
| C | -0.68244800 | 0.73267200  | -2.30841900 |
| C | -1.33569500 | -0.49719400 | -1.99132800 |
| C | -2.08002900 | -0.39893000 | -0.67279000 |
| C | -1.95361000 | -1.71846800 | 0.24830700  |
| C | -1.06138200 | -1.53102300 | 1.48557400  |
| C | 1.35230200  | -1.38056600 | 3.00857600  |
| C | 0.91601300  | -2.64787400 | 2.47011500  |
| C | -0.25994300 | -2.70410600 | 1.71379000  |
| C | -0.32148700 | -3.52665200 | 0.52396300  |
| C | -1.17866200 | -2.87182500 | -0.42799200 |
| C | -0.82971600 | -2.90277400 | -1.76066400 |
| C | -0.92429100 | -1.67378300 | -2.57359400 |
| C | 0.17668700  | -1.67414500 | -3.50777500 |
| C | 0.80588500  | -0.47315300 | -3.85748500 |
| C | 2.78095600  | 2.43212400  | -1.06254200 |

|   |             |             |             |
|---|-------------|-------------|-------------|
| C | 4.24306400  | -1.48853000 | -2.99190500 |
| C | 4.66705000  | -0.25598700 | -2.48131900 |
| C | 5.21265500  | -0.17601400 | -1.13645600 |
| C | 5.31363600  | -1.32938900 | -0.35411000 |
| C | 4.87983900  | -2.60851000 | -0.88288600 |
| C | 3.19143200  | -3.51639400 | -2.43704900 |
| C | 2.35654200  | -2.82206500 | -3.40470100 |
| C | 3.01283500  | -1.57329300 | -3.75476100 |
| C | 2.25079500  | -0.42014100 | -3.97592400 |
| C | 2.69126400  | 0.85939900  | -3.44689500 |
| C | 3.87304500  | 0.93810400  | -2.70835000 |
| C | 4.75244900  | 1.06871900  | -0.54262700 |
| C | 4.39165500  | 1.09772900  | 0.80957000  |
| C | 4.50485200  | -0.09691800 | 1.62306800  |
| C | 4.96507000  | -1.29053300 | 1.05963300  |
| C | 4.33210900  | -2.54780700 | 1.40627900  |
| C | 4.26753900  | -3.35733700 | 0.20247000  |
| C | 3.15132500  | -4.16208900 | -0.05125700 |
| C | 2.60032800  | -4.23576200 | -1.39286000 |
| C | 0.96478700  | -2.86980500 | -3.28416200 |
| C | 0.34802600  | -3.61902400 | -2.20183700 |
| C | 1.15189000  | -4.29894800 | -1.28012000 |
| C | 0.80761000  | -4.25337000 | 0.11890800  |
| C | 2.04050600  | -4.16995800 | 0.88646100  |
| C | 2.09084800  | -3.38123700 | 2.03549000  |
| C | 3.25721900  | -2.55075500 | 2.30866800  |
| C | 2.80044600  | -1.32523900 | 2.92352200  |
| C | 3.39687700  | -0.10267700 | 2.56453400  |
| C | 3.93225800  | 1.75475300  | -1.50687900 |
| C | 3.21415000  | 1.82024400  | 1.24267600  |
| C | 4.35279900  | -2.68837500 | -2.17745400 |
| C | -2.90865900 | 1.72792800  | 0.14097000  |
| C | -3.91531200 | 1.00322600  | -0.49013200 |
| C | -1.57819400 | 1.01523600  | -0.04482000 |
| C | -0.67080700 | 1.58863500  | -1.15752400 |
| O | -3.47172500 | -0.18767200 | -1.02257800 |
| C | -3.23396600 | 2.91501800  | 0.79153700  |
| C | -5.23834100 | 1.42867300  | -0.55964400 |
| H | -2.48142000 | 3.46617200  | 1.34869200  |
| H | -6.01340100 | 0.85807900  | -1.07609700 |
| C | -4.55629100 | 3.36103400  | 0.74853000  |
| C | -5.55926500 | 2.64236400  | 0.07075000  |
| H | -4.82136900 | 4.28652100  | 1.25618200  |
| C | -6.98151900 | 3.15762200  | 0.03638300  |

|    |             |             |             |
|----|-------------|-------------|-------------|
| H  | -7.01779000 | 4.16633500  | -0.39878200 |
| H  | -7.63221100 | 2.49688300  | -0.55241800 |
| H  | -7.39075300 | 3.23539000  | 1.05365400  |
| C  | -3.63457500 | -4.67400200 | 0.99537900  |
| C  | -3.73886700 | -5.80640400 | 1.80394400  |
| C  | -3.69987100 | -5.68081300 | 3.19368200  |
| C  | -3.55869200 | -4.41491600 | 3.76488400  |
| C  | -3.45529400 | -3.28584400 | 2.95144700  |
| C  | -3.48742000 | -3.39656600 | 1.55405300  |
| H  | -3.67205000 | -4.77743100 | -0.08639500 |
| H  | -3.85565300 | -6.78641300 | 1.34679900  |
| H  | -3.78361600 | -6.56156600 | 3.82639300  |
| H  | -3.53153300 | -4.30309000 | 4.84620700  |
| H  | -3.34863300 | -2.30295000 | 3.40322100  |
| C  | -3.40635500 | -2.17048400 | 0.67092700  |
| H  | -3.87442000 | -1.32462900 | 1.18284400  |
| H  | -3.98237400 | -2.33590900 | -0.24171700 |
| Br | -8.65058600 | 0.49526500  | -2.06127300 |
| C  | 2.41255000  | 5.88010200  | 0.64419200  |
| C  | 3.01695900  | 6.92027500  | -0.06262200 |
| C  | 2.42217700  | 7.41863600  | -1.22350900 |
| C  | 1.21885100  | 6.86819800  | -1.66888400 |
| C  | 0.61813700  | 5.82781000  | -0.95824900 |
| C  | 1.20492800  | 5.31555500  | 0.20790700  |
| H  | 2.87644400  | 5.49731100  | 1.54978700  |
| H  | 3.95260700  | 7.34372500  | 0.29615500  |
| H  | 2.89101200  | 8.23052500  | -1.77521500 |
| H  | 0.74397200  | 7.24971000  | -2.56997400 |
| H  | -0.32047000 | 5.40515300  | -1.30871100 |
| C  | 0.55673600  | 4.19176700  | 0.98301200  |
| H  | -0.53270100 | 4.28148200  | 0.92241100  |
| H  | 0.81669300  | 4.24233900  | 2.04596800  |
| Br | 0.45533900  | 2.75691400  | 4.45867300  |

**P2**

-2 1

|   | x           | y          | z           |
|---|-------------|------------|-------------|
| C | -0.49113600 | 1.94422400 | -0.32904100 |
| C | 0.79572300  | 2.33018300 | -1.10942300 |
| C | 1.18883100  | 1.79397300 | -2.31402800 |
| C | 0.54581600  | 0.56562100 | -2.82836700 |
| C | 0.14843300  | 1.73737800 | 1.05350700  |
| C | 1.40769400  | 2.41876400 | 1.14215600  |
| C | 1.81229800  | 2.81686700 | -0.19692900 |



|   |             |             |             |
|---|-------------|-------------|-------------|
| C | 3.17663500  | 2.74986700  | -0.54054600 |
| C | 2.58771500  | 1.72907500  | -2.68882100 |
| C | 1.55274500  | -0.21893700 | -3.50295500 |
| C | 1.52980200  | -1.61729300 | -3.44247200 |
| C | 0.50091800  | -2.26573500 | -2.66688500 |
| C | -0.44858800 | -1.48401900 | -1.99577100 |
| C | -0.87879400 | -1.83236200 | -0.65814900 |
| C | -1.16327700 | -0.61200300 | 0.05577000  |
| C | -0.77085800 | -0.53001200 | 1.37387100  |
| C | -0.11661500 | 0.68535700  | 1.90019700  |
| C | 2.35971200  | 2.05203900  | 2.09933500  |
| C | 2.08446900  | 0.95272000  | 2.98553600  |
| C | 0.86396400  | 0.27285100  | 2.87397000  |
| C | 0.83729200  | -1.17302600 | 2.96471100  |
| C | -0.16806800 | -1.66475600 | 2.04082100  |
| C | 0.03806800  | -2.87132100 | 1.36502600  |
| C | -0.32258500 | -2.95327900 | -0.02800000 |
| C | 0.68565000  | -3.74911500 | -0.70963300 |
| C | 1.08681100  | -3.41623300 | -2.00308900 |
| C | 2.81444700  | 0.49367800  | -3.41045700 |
| C | 4.70756000  | -3.14557200 | -1.32923700 |
| C | 4.96885200  | -2.07259700 | -2.18720900 |
| C | 5.61291600  | -0.87064600 | -1.67527600 |
| C | 5.96838500  | -0.78968200 | -0.32610300 |
| C | 5.68804300  | -1.90238700 | 0.56589800  |
| C | 4.03255400  | -3.71306800 | 0.85091500  |
| C | 3.02672400  | -4.20766700 | -0.07256600 |
| C | 3.44537300  | -3.85880800 | -1.42151000 |
| C | 2.49356700  | -3.46921900 | -2.36772600 |
| C | 2.76630100  | -2.35570000 | -3.26189100 |
| C | 3.98089200  | -1.66792300 | -3.16899100 |
| C | 5.02149400  | 0.27393100  | -2.34209900 |
| C | 4.80301700  | 1.45879300  | -1.63267600 |
| C | 5.17123700  | 1.54252000  | -0.23017700 |
| C | 5.74781700  | 0.44278300  | 0.41146600  |
| C | 5.33481200  | 0.09275400  | 1.75995600  |
| C | 5.29375600  | -1.35509600 | 1.85424000  |
| C | 4.29052000  | -1.98294400 | 2.59993400  |
| C | 3.64579800  | -3.18343700 | 2.08576000  |
| C | 1.67361400  | -4.15693800 | 0.27523100  |
| C | 1.27211900  | -3.60966200 | 1.56068600  |
| C | 2.24208800  | -3.13103500 | 2.44714600  |
| C | 2.01500400  | -1.89357200 | 3.17560200  |
| C | 3.28317600  | -1.18740300 | 3.27432300  |

|    |             |             |             |
|----|-------------|-------------|-------------|
| C  | 3.31323000  | 0.20714900  | 3.17855100  |
| C  | 4.35897500  | 0.86158800  | 2.40490400  |
| C  | 3.76951900  | 2.00831300  | 1.74198300  |
| C  | 4.15854400  | 2.33924500  | 0.44347300  |
| C  | 4.01082300  | -0.21670700 | -3.26306300 |
| C  | 3.56915100  | 2.20439100  | -1.80926100 |
| C  | 5.07196300  | -3.05636300 | 0.07493300  |
| C  | -2.62683900 | 0.82509700  | -1.55532500 |
| C  | -3.84262700 | 0.23590100  | -1.13238700 |
| C  | -1.22218700 | 0.58597700  | -0.92716900 |
| C  | -0.43674100 | -0.05469100 | -2.09595300 |
| O  | -3.85176000 | -0.54810400 | -0.01060500 |
| C  | -2.67745600 | 1.60951200  | -2.72232000 |
| C  | -5.02449700 | 0.46166700  | -1.86398800 |
| H  | -1.75437900 | 2.05020000  | -3.08787200 |
| H  | -5.96376400 | -0.00072300 | -1.56670300 |
| C  | -3.84780100 | 1.83969900  | -3.43522300 |
| C  | -5.04589300 | 1.25572800  | -3.00963100 |
| H  | -3.82074100 | 2.46080500  | -4.32826700 |
| C  | -6.35166000 | 1.45057600  | -3.74697900 |
| H  | -6.70604400 | 2.48703600  | -3.65649900 |
| H  | -6.23726900 | 1.24393500  | -4.81956300 |
| H  | -7.12558900 | 0.78921700  | -3.34096600 |
| C  | -5.04756500 | -2.02814400 | 1.53386600  |
| C  | -3.94009100 | -2.11441900 | 2.37869900  |
| C  | -6.18773700 | -2.80260900 | 1.80940200  |
| C  | -3.96007600 | -2.97368700 | 3.48169500  |
| H  | -3.06443200 | -1.51088100 | 2.17336900  |
| C  | -6.20461000 | -3.65237400 | 2.91336500  |
| H  | -7.04899700 | -2.71423700 | 1.14630700  |
| C  | -5.08944800 | -3.74524600 | 3.75324400  |
| H  | -3.08536100 | -3.03632600 | 4.12555800  |
| H  | -7.09175400 | -4.24881500 | 3.11719600  |
| H  | -5.10301200 | -4.41443900 | 4.61157300  |
| Br | -8.30286500 | -1.27748800 | -1.23448000 |
| C  | -5.12711500 | -1.12186000 | 0.33391200  |
| H  | -5.84946200 | -0.31803200 | 0.52396600  |
| H  | -5.53601300 | -1.67871500 | -0.51554300 |
| C  | -3.52716300 | 2.84327000  | 1.17757800  |
| C  | -4.26095700 | 3.02625100  | 2.35178400  |
| C  | -3.72792100 | 3.77214500  | 3.40365000  |
| C  | -2.46228000 | 4.34557300  | 3.26346000  |
| C  | -1.72791800 | 4.16188100  | 2.09125900  |
| C  | -2.24606500 | 3.39380800  | 1.03388500  |

|    |             |            |             |
|----|-------------|------------|-------------|
| H  | -3.96601800 | 2.28127200 | 0.36114500  |
| H  | -5.25123300 | 2.58501500 | 2.43816900  |
| H  | -4.29865000 | 3.91328400 | 4.31957500  |
| H  | -2.04304700 | 4.94757400 | 4.06726200  |
| H  | -0.75947400 | 4.64394600 | 1.96696600  |
| C  | -1.42347800 | 3.23135000 | -0.23541800 |
| H  | -0.74730800 | 4.09116500 | -0.30013200 |
| H  | -2.07324600 | 3.25998800 | -1.11023100 |
| Br | 1.33198100  | 5.66959800 | 0.40207400  |

**P3**

-2 1

|   | x           | y           | z           |
|---|-------------|-------------|-------------|
| C | 0.39528500  | 1.14676100  | -1.48406900 |
| C | -0.70275200 | 1.91530700  | -1.19903700 |
| C | -1.02606400 | 2.49192200  | 0.17177400  |
| C | -0.27740100 | 1.63554400  | 1.21554300  |
| C | 0.10348200  | 0.32505700  | -2.66724500 |
| C | -1.23801000 | 0.63530200  | -3.10808600 |
| C | -1.75261400 | 1.62003700  | -2.18735100 |
| C | -3.08042900 | 1.57932200  | -1.80450000 |
| C | -2.48700000 | 2.14485900  | 0.53519800  |
| C | -1.19404800 | 1.21657900  | 2.24192600  |
| C | -0.95134500 | 0.06724500  | 2.99942200  |
| C | 0.20173800  | -0.73675400 | 2.69670600  |
| C | 1.05347700  | -0.34580400 | 1.65494000  |
| C | 1.57625800  | -1.34586000 | 0.74614700  |
| C | 1.69999600  | -0.76121600 | -0.55711000 |
| C | 1.38952400  | -1.52853000 | -1.66424800 |
| C | 0.58178000  | -0.96864000 | -2.76645000 |
| C | -2.07110500 | -0.37137600 | -3.61296700 |
| C | -1.57946600 | -1.72974600 | -3.69781700 |
| C | -0.27378200 | -2.02026200 | -3.27777200 |
| C | -0.01347700 | -3.22193400 | -2.50422600 |
| C | 1.00530500  | -2.91444900 | -1.51617200 |
| C | 0.94762700  | -3.50211800 | -0.24740800 |
| C | 1.24048400  | -2.69619500 | 0.91157100  |
| C | 0.34319300  | -3.09627100 | 1.98096300  |
| C | -0.16834600 | -2.13276200 | 2.85088700  |
| C | -2.55618100 | 1.56518100  | 1.85180700  |
| C | -3.74357100 | -2.88615600 | 2.34606900  |
| C | -4.20907500 | -1.57034700 | 2.42952200  |
| C | -5.00225800 | -1.00771500 | 1.34862400  |
| C | -5.29951500 | -1.78009100 | 0.22195300  |

|   |             |             |             |
|---|-------------|-------------|-------------|
| C | -4.80920900 | -3.14432600 | 0.13106700  |
| C | -2.88306300 | -4.49931300 | 0.86948900  |
| C | -1.85986800 | -4.19905400 | 1.85823100  |
| C | -2.39435900 | -3.20578200 | 2.77215500  |
| C | -1.56331400 | -2.18546000 | 3.25562000  |
| C | -2.04747700 | -0.82317300 | 3.35005400  |
| C | -3.34660500 | -0.51681400 | 2.93478700  |
| C | -4.62318900 | 0.38619100  | 1.20371400  |
| C | -4.54636700 | 0.95208500  | -0.07460100 |
| C | -4.85105700 | 0.14918300  | -1.24209700 |
| C | -5.23251300 | -1.18980100 | -1.10266800 |
| C | -4.70041200 | -2.18901300 | -2.01577600 |
| C | -4.43879700 | -3.39825500 | -1.24999700 |
| C | -3.31769800 | -4.17964700 | -1.54096600 |
| C | -2.52323800 | -4.73863500 | -0.46177100 |
| C | -0.51588000 | -4.14983900 | 1.47518600  |
| C | -0.14434000 | -4.39719100 | 0.08935600  |
| C | -1.12766700 | -4.68805200 | -0.85866500 |
| C | -1.05899700 | -4.09164100 | -2.18337200 |
| C | -2.41403300 | -3.78327200 | -2.60979700 |
| C | -2.66974400 | -2.62697500 | -3.34920700 |
| C | -3.83932600 | -1.81451000 | -3.04875800 |
| C | -3.46114300 | -0.41884400 | -3.20805000 |
| C | -3.95348100 | 0.54264300  | -2.31644300 |
| C | -3.61169200 | 0.69122800  | 2.18251900  |
| C | -3.45130600 | 1.84105400  | -0.40084600 |
| C | -4.04702000 | -3.68690300 | 1.17115300  |
| C | 2.77077300  | 1.63582300  | -0.66782300 |
| C | 4.08856700  | 1.20373200  | -0.37831200 |
| C | 1.48966000  | 0.77494500  | -0.48459500 |
| C | 0.84095500  | 0.87813900  | 0.93215300  |
| O | 4.29814500  | -0.09917500 | -0.00895800 |
| C | 2.62196900  | 2.95843700  | -1.10846600 |
| C | 5.16216100  | 2.10518000  | -0.48452300 |
| H | 1.63061300  | 3.29857000  | -1.38282400 |
| H | 6.17727200  | 1.79816200  | -0.23967500 |
| C | 3.68860000  | 3.84493200  | -1.22703000 |
| C | 4.98032400  | 3.42511400  | -0.89870000 |
| H | 3.50732400  | 4.86069900  | -1.57329600 |
| C | 6.18004800  | 4.34265400  | -0.98395200 |
| H | 6.30877900  | 4.73668100  | -2.00154900 |
| H | 6.06399000  | 5.20883400  | -0.31826800 |
| H | 7.09447700  | 3.80959000  | -0.70052200 |
| C | 5.84860700  | -1.95317800 | 0.40756700  |

|    |             |             |             |
|----|-------------|-------------|-------------|
| C  | 4.85022200  | -2.90600800 | 0.19882200  |
| C  | 7.11860300  | -2.37128300 | 0.84053100  |
| C  | 5.10254900  | -4.25976900 | 0.44054100  |
| H  | 3.87755900  | -2.58839400 | -0.15431100 |
| C  | 7.36798900  | -3.72242200 | 1.07298200  |
| H  | 7.89889900  | -1.61957700 | 0.96304200  |
| C  | 6.35961300  | -4.67302600 | 0.88069000  |
| H  | 4.30901600  | -4.98709300 | 0.28272200  |
| H  | 8.35498200  | -4.03527200 | 1.40796800  |
| H  | 6.55514500  | -5.72688900 | 1.07006700  |
| Br | 8.76383100  | 1.21794800  | 0.29985500  |
| C  | 5.67946900  | -0.48088100 | 0.13870200  |
| H  | 6.23341400  | -0.21135800 | -0.76885700 |
| H  | 6.14842800  | 0.09813200  | 0.94059700  |
| C  | -1.04314000 | 5.28300600  | -1.84401500 |
| C  | -1.77721100 | 6.12810600  | -2.67808200 |
| C  | -2.99977500 | 6.64535200  | -2.24586700 |
| C  | -3.47580600 | 6.31294800  | -0.97558400 |
| C  | -2.74266000 | 5.46750100  | -0.14109300 |
| C  | -1.51365400 | 4.93847200  | -0.56857600 |
| H  | -0.08799900 | 4.89002200  | -2.18574800 |
| H  | -1.39187000 | 6.38305000  | -3.66320200 |
| H  | -3.57411600 | 7.30566100  | -2.89289100 |
| H  | -4.42362000 | 6.71715600  | -0.62624400 |
| H  | -3.09967000 | 5.21984600  | 0.85807700  |
| C  | -0.72066700 | 4.02621100  | 0.34380300  |
| H  | -0.94675400 | 4.26717900  | 1.38854100  |
| H  | 0.35276500  | 4.16453300  | 0.18046300  |
| Br | -2.80715800 | 4.07929000  | 3.38126100  |

**RF5<sup>2-</sup>**

-2 1

|   | x           | y           | z           |
|---|-------------|-------------|-------------|
| C | -2.70434500 | -1.23543100 | -0.00042000 |
| C | -1.91477700 | -1.79343000 | 1.17924600  |
| C | -1.56092500 | -1.02703400 | 2.27516100  |
| C | -1.73367900 | 0.43080900  | 2.28065300  |
| C | -1.91449300 | -1.79340200 | -1.17989300 |
| C | -1.04439900 | -2.83734800 | -0.72240800 |
| C | -1.04457000 | -2.83736100 | 0.72194500  |
| C | 0.13803400  | -3.15035600 | 1.43148100  |
| C | -0.32835300 | -1.31233800 | 3.00359100  |
| C | -0.59948000 | 0.99465700  | 3.00696200  |
| C | -0.04014200 | 2.21361400  | 2.57875800  |

|   |             |             |             |
|---|-------------|-------------|-------------|
| C | -0.57041400 | 2.89064400  | 1.43541800  |
| C | -1.64841300 | 2.30802200  | 0.72082400  |
| C | -1.64825700 | 2.30803400  | -0.72134500 |
| C | -2.24338200 | 1.08798700  | -1.17864100 |
| C | -1.73317400 | 0.43085300  | -2.28121700 |
| C | -1.56041200 | -1.02699600 | -2.27571800 |
| C | 0.13836100  | -3.15032900 | -1.43168100 |
| C | 0.49903700  | -2.36472200 | -2.57549700 |
| C | -0.32767600 | -1.31228900 | -3.00387100 |
| C | 0.23982600  | -0.07524500 | -3.47443000 |
| C | -0.59880700 | 0.99470700  | -3.00726000 |
| C | -0.03956300 | 2.21365600  | -2.57890900 |
| C | -0.57009500 | 2.89066400  | -1.43568000 |
| C | 0.55909700  | 3.44964100  | -0.69754900 |
| C | 0.55893900  | 3.44962800  | 0.69755300  |
| C | 0.23904500  | -0.07530300 | 3.47430400  |
| C | 3.81547400  | 1.78459000  | 1.17329600  |
| C | 3.46450400  | 1.03204400  | 2.29993300  |
| C | 3.63216800  | -0.40631300 | 2.29992700  |
| C | 4.14729800  | -1.05676300 | 1.17336100  |
| C | 4.51118500  | -0.27705800 | 0.00042200  |
| C | 3.81573900  | 1.78461000  | -1.17257600 |
| C | 2.97332600  | 2.87583400  | -0.71946800 |
| C | 2.97316100  | 2.87582000  | 0.72001100  |
| C | 1.78161300  | 3.16366400  | 1.42983200  |
| C | 1.41440500  | 2.38085800  | 2.58367500  |
| C | 2.23298400  | 1.32932000  | 3.02875100  |
| C | 2.50352900  | -0.98108100 | 3.03018500  |
| C | 1.95196000  | -2.19628200 | 2.58446300  |
| C | 2.48926500  | -2.87144100 | 1.43079900  |
| C | 3.58119100  | -2.31449500 | 0.71950300  |
| C | 3.58135700  | -2.31448600 | -0.71890500 |
| C | 4.14756300  | -1.05674600 | -1.17261100 |
| C | 3.63268900  | -0.40627400 | -2.29928300 |
| C | 3.46502300  | 1.03207900  | -2.29930500 |
| C | 1.78193400  | 3.16369000  | -1.42955500 |
| C | 1.41498600  | 2.38089900  | -2.58349100 |
| C | 2.23366500  | 1.32936800  | -3.02839500 |
| C | 1.66061500  | 0.09010100  | -3.49081200 |
| C | 2.50421300  | -0.98103200 | -3.02980600 |
| C | 1.95254500  | -2.19624200 | -2.58423300 |
| C | 2.48959100  | -2.87142400 | -1.43045900 |
| C | 1.36727200  | -3.43489900 | -0.69721600 |
| C | 1.36710900  | -3.43491100 | 0.69729200  |

|   |             |             |             |
|---|-------------|-------------|-------------|
| C | 1.65982900  | 0.09004500  | 3.49101600  |
| C | 0.49845500  | -2.36476300 | 2.57538800  |
| C | 4.34919800  | 1.11025200  | 0.00041500  |
| C | -4.43063400 | 0.46307500  | -0.00035400 |
| C | -4.99088300 | -0.81635800 | -0.00048600 |
| C | -2.91192100 | 0.35855900  | -0.00040900 |
| C | -2.24359800 | 1.08795700  | 1.17795600  |
| O | -4.08420400 | -1.81344300 | -0.00064200 |
| C | -5.25932200 | 1.57325900  | -0.00056200 |
| C | -6.37022400 | -1.01276000 | -0.00083000 |
| H | -4.82709300 | 2.57074900  | -0.00092900 |
| H | -6.77527400 | -2.02174700 | -0.00129000 |
| C | -6.65119100 | 1.39369800  | -0.00080000 |
| C | -7.21332200 | 0.11100400  | -0.00066200 |
| H | -7.30566200 | 2.26335700  | -0.00110000 |
| C | -8.71520200 | -0.07559700 | 0.00232400  |
| H | -9.05593400 | -0.61277800 | 0.89825400  |
| H | -9.23611100 | 0.88829000  | -0.02321900 |
| H | -9.05349700 | -0.65910800 | -0.86483400 |

**TSa1-1**

-2 1

|   | x           | y           | z           |
|---|-------------|-------------|-------------|
| C | 1.16448000  | 0.82809500  | -1.21512000 |
| C | 0.30826000  | 1.07944100  | -2.31274000 |
| C | -0.59473300 | 2.17212900  | -2.36614700 |
| C | -0.72660600 | 2.98279100  | -1.15121100 |
| C | 1.22679500  | -0.58356700 | -1.03151300 |
| C | 0.47456000  | -1.24428900 | -2.10074300 |
| C | -0.10657900 | -0.20048200 | -2.90675800 |
| C | -1.37591600 | -0.35818700 | -3.45788600 |
| C | -1.91241100 | 1.97701900  | -2.89006500 |
| C | -2.12557000 | 3.33468400  | -0.98406500 |
| C | -2.68459400 | 3.44102400  | 0.29763600  |
| C | -1.86255300 | 3.17941300  | 1.45157400  |
| C | -0.52182800 | 2.80551700  | 1.26259500  |
| C | 0.07175400  | 1.75887000  | 2.08017800  |
| C | 1.04063700  | 1.05424000  | 1.28666900  |
| C | 1.12579200  | -0.32172700 | 1.41653100  |
| C | 1.26553400  | -1.18794200 | 0.23816800  |
| C | -0.22639700 | -2.42706300 | -1.86295000 |
| C | -0.21303400 | -3.02662600 | -0.54247000 |
| C | 0.50876000  | -2.37791700 | 0.48281100  |
| C | -0.07892300 | -2.28842900 | 1.81857200  |

|   |             |             |             |
|---|-------------|-------------|-------------|
| C | 0.30835400  | -1.01989200 | 2.39075800  |
| C | -0.58729500 | -0.31602000 | 3.20994400  |
| C | -0.70613200 | 1.11148400  | 3.05520000  |
| C | -2.11057700 | 1.46938900  | 3.21738500  |
| C | -2.67401800 | 2.47784500  | 2.43802500  |
| C | -2.86526600 | 2.70907900  | -2.05264300 |
| C | -5.46717300 | 0.50227300  | 1.04382500  |
| C | -5.47144200 | 1.07736600  | -0.23240000 |
| C | -5.34536900 | 0.23133800  | -1.41455800 |
| C | -5.23581600 | -1.15470800 | -1.26508300 |
| C | -5.22308000 | -1.74474200 | 0.06060800  |
| C | -4.52068500 | -1.19689600 | 2.35976100  |
| C | -4.13422400 | 0.08099500  | 2.93407100  |
| C | -4.72113300 | 1.13297600  | 2.11985200  |
| C | -4.00388800 | 2.30844100  | 1.87869600  |
| C | -4.00881000 | 2.90721200  | 0.55203100  |
| C | -4.72316100 | 2.29250100  | -0.48235200 |
| C | -4.55166100 | 0.93556900  | -2.40262100 |
| C | -3.62686300 | 0.22249300  | -3.18994700 |
| C | -3.51371400 | -1.22314000 | -3.03610600 |
| C | -4.29649300 | -1.89571900 | -2.09612300 |
| C | -3.71172100 | -2.94857600 | -1.28246800 |
| C | -4.28707800 | -2.85412400 | 0.05195600  |
| C | -3.48605400 | -3.10395200 | 1.17013800  |
| C | -3.61025900 | -2.26096500 | 2.35300800  |
| C | -2.85440400 | 0.24830100  | 3.47213700  |
| C | -1.90815800 | -0.85776100 | 3.46776600  |
| C | -2.28324600 | -2.08409200 | 2.90746700  |
| C | -1.34525000 | -2.82351800 | 2.07321700  |
| C | -2.09182500 | -3.47406300 | 1.01242100  |
| C | -1.53213000 | -3.54529200 | -0.27483000 |
| C | -2.36705600 | -3.28900000 | -1.44112700 |
| C | -1.55506900 | -2.59612400 | -2.42717000 |
| C | -2.11731500 | -1.58404900 | -3.20812600 |
| C | -4.14635900 | 2.19863200  | -1.81756200 |
| C | -2.31636800 | 0.75112400  | -3.46700900 |
| C | -5.35339300 | -0.93678100 | 1.19991600  |
| C | 2.63756600  | 2.60531500  | -0.03802800 |
| C | 3.88719400  | 1.90311700  | 0.14535700  |
| C | 1.31121100  | 1.81515400  | -0.04606800 |
| C | 0.07127000  | 2.75127300  | -0.04179600 |
| O | 3.90627100  | 0.61664400  | 0.30294500  |
| C | 2.64687600  | 3.98821400  | -0.20955500 |
| C | 5.06730600  | 2.70998500  | 0.15450700  |



|    |            |             |             |
|----|------------|-------------|-------------|
| H  | 1.69934000 | 4.50315000  | -0.34834500 |
| H  | 6.02230500 | 2.21639600  | 0.31654000  |
| C  | 3.82552000 | 4.74176300  | -0.21147800 |
| C  | 5.05067600 | 4.09217600  | -0.02773800 |
| H  | 3.78618000 | 5.82059800  | -0.35401600 |
| C  | 6.34941900 | 4.87130200  | -0.05600800 |
| H  | 6.80516400 | 4.86804800  | -1.05736000 |
| H  | 6.19372900 | 5.92108700  | 0.22435200  |
| H  | 7.09063700 | 4.44424400  | 0.63066400  |
| C  | 5.18272400 | -1.72693000 | 0.00565600  |
| C  | 4.74963200 | -2.17839800 | -1.24927300 |
| C  | 4.95223500 | -2.53452500 | 1.12886600  |
| C  | 4.10793700 | -3.40721500 | -1.37904800 |
| H  | 4.90779800 | -1.54916600 | -2.12054700 |
| C  | 4.31079700 | -3.76334800 | 1.00097400  |
| H  | 5.28456500 | -2.18858100 | 2.10382300  |
| C  | 3.88681400 | -4.20587200 | -0.25455300 |
| H  | 3.76260500 | -3.73563900 | -2.35635300 |
| H  | 4.13021700 | -4.37354900 | 1.88306500  |
| H  | 3.37232700 | -5.15873700 | -0.35377100 |
| Br | 8.18713400 | -1.06767700 | 0.05302700  |
| C  | 5.84198800 | -0.42786100 | 0.14472100  |
| H  | 5.98195100 | 0.20436900  | -0.71289500 |
| H  | 6.00855300 | -0.00918700 | 1.11942100  |

**TSa1**

-2 1

|   | x           | y           | z           |
|---|-------------|-------------|-------------|
| C | 2.48179700  | -1.33726200 | 0.00362300  |
| C | 1.82846000  | -1.90369600 | -1.15630300 |
| C | 1.51176400  | -1.14355400 | -2.29882200 |
| C | 1.72644400  | 0.30061200  | -2.29019100 |
| C | 1.82620600  | -1.90290800 | 1.16262900  |
| C | 0.89156100  | -2.92173500 | 0.72858900  |
| C | 0.89300000  | -2.92226800 | -0.72341600 |
| C | -0.28195500 | -3.18555800 | -1.42136800 |
| C | 0.26953300  | -1.37509000 | -3.00145800 |
| C | 0.62902500  | 0.93032000  | -3.02571600 |
| C | 0.12292600  | 2.17470200  | -2.59586500 |
| C | 0.67789300  | 2.81477600  | -1.43933900 |
| C | 1.70679800  | 2.16385400  | -0.72299100 |
| C | 1.70536800  | 2.16435900  | 0.72630400  |
| C | 2.26014300  | 0.92460300  | 1.18250500  |
| C | 1.72188100  | 0.30221700  | 2.29481100  |

|   |             |             |             |
|---|-------------|-------------|-------------|
| C | 1.50719200  | -1.14191900 | 2.30400700  |
| C | -0.28480200 | -3.18454100 | 1.42435300  |
| C | -0.62109700 | -2.37788100 | 2.58930300  |
| C | 0.26353000  | -1.37296000 | 3.00426600  |
| C | -0.26698700 | -0.09552600 | 3.47248300  |
| C | 0.62293700  | 0.93244300  | 3.02765600  |
| C | 0.11771300  | 2.17651100  | 2.59593800  |
| C | 0.67501900  | 2.81582900  | 1.44011400  |
| C | -0.41742400 | 3.43970500  | 0.69657200  |
| C | -0.41604400 | 3.43922900  | -0.69843400 |
| C | -0.26001800 | -0.09796700 | -3.47157300 |
| C | -3.74520200 | 1.91613800  | -1.17789000 |
| C | -3.42592500 | 1.15214500  | -2.30989600 |
| C | -3.64006000 | -0.28539900 | -2.30504800 |
| C | -4.17791900 | -0.90402000 | -1.17444000 |
| C | -4.50940400 | -0.11346000 | -0.00380000 |
| C | -3.74754300 | 1.91694200  | 1.17041500  |
| C | -2.84411300 | 2.96119400  | 0.72238800  |
| C | -2.84266900 | 2.96068700  | -0.72879400 |
| C | -1.64804700 | 3.19757200  | -1.42331000 |
| C | -1.31277400 | 2.39921000  | -2.59479500 |
| C | -2.18404000 | 1.39437300  | -3.02527600 |
| C | -2.56087800 | -0.91768700 | -3.05583600 |
| C | -2.04278100 | -2.15563400 | -2.59858800 |
| C | -2.60425500 | -2.79895000 | -1.43185600 |
| C | -3.66083000 | -2.19342800 | -0.72190100 |
| C | -3.66224700 | -2.19290800 | 0.71742300  |
| C | -4.18027600 | -0.90319000 | 1.16804400  |
| C | -3.64466800 | -0.28380800 | 2.29929500  |
| C | -3.43051200 | 1.15374800  | 2.30354700  |
| C | -1.65090200 | 3.19856200  | 1.41914600  |
| C | -1.31798300 | 2.40103400  | 2.59185900  |
| C | -2.19010000 | 1.39649300  | 3.02130500  |
| C | -1.66643300 | 0.11692000  | 3.47932800  |
| C | -2.56703000 | -0.91554700 | 3.05270700  |
| C | -2.04798300 | -2.15380700 | 2.59734800  |
| C | -2.60710600 | -2.79790400 | 1.42991200  |
| C | -1.52231400 | -3.43013200 | 0.69802200  |
| C | -1.52094300 | -3.43066100 | -0.69735900 |
| C | -1.65944600 | 0.11447800  | -3.48139100 |
| C | -0.61591000 | -2.37972100 | -2.58755000 |
| C | -4.30726100 | 1.27716200  | -0.00409000 |
| C | 4.44280800  | 0.26346700  | 0.00383000  |
| C | 5.12659900  | -0.99101900 | 0.00495200  |

|   |            |             |             |
|---|------------|-------------|-------------|
| C | 2.90826700 | 0.15792000  | 0.00356200  |
| C | 2.26238000 | 0.92374000  | -1.17721000 |
| O | 4.44782800 | -2.08901100 | 0.00510700  |
| C | 5.14607500 | 1.45841900  | 0.00749000  |
| C | 6.55007400 | -0.94663500 | 0.00918100  |
| H | 4.59759700 | 2.39950100  | 0.01211100  |
| H | 7.08246200 | -1.89650900 | 0.01313200  |
| C | 6.54787300 | 1.47287500  | 0.01211400  |
| C | 7.25184100 | 0.26034900  | 0.00944200  |
| H | 7.08618000 | 2.41933300  | 0.01718600  |
| C | 8.76677800 | 0.25577500  | -0.02525500 |
| H | 9.18223400 | -0.55126800 | 0.59212100  |
| H | 9.15356500 | 0.10716700  | -1.04484000 |
| H | 9.17930600 | 1.20437200  | 0.34124200  |

**TSa2**

-2 1

|   | x           | y           | z           |
|---|-------------|-------------|-------------|
| C | 2.33750000  | 0.01166800  | -1.40950800 |
| C | 1.72505300  | 1.14925400  | -1.99010800 |
| C | 1.44674300  | 2.33374000  | -1.26033900 |
| C | 1.70374600  | 2.30996000  | 0.18358600  |
| C | 1.72630000  | -1.14412800 | -1.97268100 |
| C | 0.76505300  | -0.72874800 | -3.00044000 |
| C | 0.76240000  | 0.71375000  | -3.00910300 |
| C | -0.42414500 | 1.41451800  | -3.22305700 |
| C | 0.20461300  | 3.01563700  | -1.45996700 |
| C | 0.63861800  | 3.03788700  | 0.84961000  |
| C | 0.17998200  | 2.62734500  | 2.11088800  |
| C | 0.76405400  | 1.46631700  | 2.73435300  |
| C | 1.76825100  | 0.75613100  | 2.05253900  |
| C | 1.78467000  | -0.69861500 | 2.06530800  |
| C | 2.31787200  | -1.16156300 | 0.81310300  |
| C | 1.71716400  | -2.26358800 | 0.22154900  |
| C | 1.45408200  | -2.30462400 | -1.22188400 |
| C | -0.41798900 | -1.43816500 | -3.20556600 |
| C | -0.71140700 | -2.61300200 | -2.40469700 |
| C | 0.21789600  | -3.00368700 | -1.41672100 |
| C | -0.27550000 | -3.43851900 | -0.10987500 |
| C | 0.65937900  | -2.98216900 | 0.89140600  |
| C | 0.19695600  | -2.56846200 | 2.15349500  |
| C | 0.77360900  | -1.39747100 | 2.75420700  |
| C | -0.29361700 | -0.65880500 | 3.42162200  |
| C | -0.29785600 | 0.73483600  | 3.41288400  |
| C | -0.29552900 | 3.47042400  | -0.15973500 |

|   |             |             |             |
|---|-------------|-------------|-------------|
| C | -3.67740400 | 1.19455000  | 1.98830600  |
| C | -3.38891700 | 2.32234000  | 1.21060100  |
| C | -3.66342500 | 2.30983000  | -0.22268800 |
| C | -4.22887200 | 1.17266700  | -0.80925700 |
| C | -4.51791000 | 0.00351900  | -0.00026500 |
| C | -3.67228200 | -1.15419100 | 2.00713000  |
| C | -2.73202700 | -0.69743200 | 3.01608300  |
| C | -2.73554500 | 0.75655200  | 3.00530000  |
| C | -1.54113000 | 1.45625100  | 3.20036400  |
| C | -1.24152300 | 2.62950700  | 2.39283300  |
| C | -2.15016500 | 3.04619700  | 1.41203400  |
| C | -2.61783800 | 3.05120600  | -0.89916300 |
| C | -2.13330300 | 2.59497200  | -2.14192300 |
| C | -2.72256000 | 1.41249100  | -2.75445100 |
| C | -3.74398200 | 0.71549400  | -2.10517700 |
| C | -3.74213800 | -0.73760700 | -2.09611200 |
| C | -4.22069000 | -1.17644800 | -0.79184200 |
| C | -3.65014500 | -2.30064300 | -0.18703200 |
| C | -3.37546100 | -2.29249500 | 1.24471800  |
| C | -1.53321500 | -1.38836200 | 3.22169800  |
| C | -1.22597700 | -2.57178900 | 2.43151200  |
| C | -2.13287200 | -3.00554700 | 1.45706200  |
| C | -1.64762700 | -3.45980800 | 0.15848000  |
| C | -2.59824300 | -3.04524900 | -0.85491200 |
| C | -2.12223300 | -2.60873600 | -2.10505400 |
| C | -2.71728700 | -1.43930000 | -2.73615000 |
| C | -1.66061800 | -0.71463600 | -3.42198600 |
| C | -1.66261800 | 0.68179500  | -3.43010700 |
| C | -1.66935800 | 3.48461700  | 0.10800000  |
| C | -0.72481900 | 2.60387900  | -2.44257000 |
| C | -4.26342400 | 0.01329700  | 1.38013200  |
| C | 4.46442900  | 0.11468900  | 0.04464300  |
| C | 5.23585100  | -1.11885800 | 0.02283200  |
| C | 2.92351100  | 0.03033100  | 0.01188100  |
| C | 2.27735700  | 1.20266400  | 0.78901500  |
| O | 4.70546200  | -2.26841100 | 0.00609200  |
| C | 5.11067400  | 1.35031300  | 0.03681200  |
| C | 6.67099000  | -0.93524900 | 0.02641000  |
| H | 4.51073600  | 2.25852900  | 0.05005200  |
| H | 7.26487600  | -1.84964500 | 0.02060000  |
| C | 6.50445000  | 1.47176700  | 0.02323200  |
| C | 7.29202100  | 0.30533100  | 0.01581600  |
| H | 6.97065900  | 2.45649600  | 0.02638200  |
| C | 8.80378900  | 0.40934100  | -0.02953700 |

|   |            |             |             |
|---|------------|-------------|-------------|
| H | 9.17751800 | 1.18866900  | 0.65016400  |
| H | 9.27862800 | -0.53797600 | 0.25431400  |
| H | 9.16973400 | 0.66819300  | -1.03547800 |

**TSa3-1**

-2 1

|   | x           | y           | z           |
|---|-------------|-------------|-------------|
| C | -0.46108000 | 1.69915800  | 0.00291600  |
| C | 0.60331500  | 2.46939100  | -0.65996100 |
| C | 1.06419600  | 2.24820700  | -1.95550900 |
| C | 0.64023400  | 1.01836400  | -2.64990700 |
| C | 0.07476100  | 1.48395900  | 1.34658500  |
| C | 1.20733700  | 2.35956300  | 1.58581100  |
| C | 1.54249400  | 2.97454900  | 0.32603600  |
| C | 2.87821300  | 3.23706800  | 0.00260600  |
| C | 2.44781600  | 2.47368500  | -2.28597500 |
| C | 1.76337500  | 0.52550700  | -3.41516900 |
| C | 1.97930900  | -0.85112700 | -3.55936100 |
| C | 1.08079900  | -1.77365500 | -2.90984900 |
| C | 0.01844500  | -1.27216000 | -2.14476100 |
| C | -0.33063300 | -1.88637600 | -0.87879400 |
| C | -0.81316700 | -0.85844500 | 0.00721900  |
| C | -0.43456600 | -0.91593300 | 1.33421100  |
| C | -0.01406500 | 0.29447900  | 2.06087200  |
| C | 2.21017100  | 2.02215200  | 2.50072100  |
| C | 2.13150800  | 0.77074400  | 3.21667600  |
| C | 1.03944600  | -0.07983200 | 2.96663000  |
| C | 1.26723100  | -1.51162300 | 2.83581900  |
| C | 0.35685900  | -2.02096800 | 1.83114900  |
| C | 0.76077500  | -3.05585100 | 0.97976000  |
| C | 0.40926000  | -2.98296200 | -0.41562500 |
| C | 1.53303100  | -3.48420300 | -1.19262500 |
| C | 1.86109100  | -2.89582500 | -2.41283600 |
| C | 2.88300900  | 1.41656200  | -3.18937500 |
| C | 5.38768800  | -2.11684000 | -1.63611800 |
| C | 5.45546500  | -0.89815800 | -2.31895700 |
| C | 5.88376100  | 0.30561200  | -1.61792000 |
| C | 6.23081600  | 0.23828300  | -0.26573100 |
| C | 6.15131300  | -1.02768400 | 0.44260700  |
| C | 4.83599600  | -3.11568100 | 0.41938300  |
| C | 3.92303000  | -3.62892300 | -0.58728500 |
| C | 4.26523600  | -3.01197000 | -1.85946100 |
| C | 3.25284300  | -2.65284100 | -2.75278000 |
| C | 3.32379400  | -1.38513800 | -3.46353000 |

|   |             |             |             |
|---|-------------|-------------|-------------|
| C | 4.40468500  | -0.52488400 | -3.24477100 |
| C | 5.10592700  | 1.42246600  | -2.11831600 |
| C | 4.68756000  | 2.43222600  | -1.24366000 |
| C | 5.04979900  | 2.36280500  | 0.16516500  |
| C | 5.80384700  | 1.28959900  | 0.64291800  |
| C | 5.46324000  | 0.67125800  | 1.91522700  |
| C | 5.68009200  | -0.76068100 | 1.79055500  |
| C | 4.80257800  | -1.65297100 | 2.41345700  |
| C | 4.37356500  | -2.85726100 | 1.71343000  |
| C | 2.58399000  | -3.86079900 | -0.26237300 |
| C | 2.10326700  | -3.59361200 | 1.08435900  |
| C | 2.98452300  | -3.09742100 | 2.05026000  |
| C | 2.55414700  | -2.04075300 | 2.95369800  |
| C | 3.68326500  | -1.15656200 | 3.19022000  |
| C | 3.46822000  | 0.22233900  | 3.30501100  |
| C | 4.38307800  | 1.15254000  | 2.65684700  |
| C | 3.60084300  | 2.27208500  | 2.15973800  |
| C | 3.92676600  | 2.86487100  | 0.93872700  |
| C | 4.18147700  | 0.90770500  | -3.11451900 |
| C | 3.35193700  | 2.98346200  | -1.33770400 |
| C | 5.74380400  | -2.18474600 | -0.22906900 |
| C | -2.52270900 | 0.65512300  | -1.29060400 |
| C | -3.63306700 | -0.17042700 | -0.99830500 |
| C | -1.07060400 | 0.45922500  | -0.77511600 |
| C | -0.22577700 | 0.13728500  | -2.03913500 |
| O | -3.47260800 | -1.22850900 | -0.14399000 |
| C | -2.72703000 | 1.70359900  | -2.20215600 |
| C | -4.88011400 | 0.09906000  | -1.59312000 |
| H | -1.88066700 | 2.33163200  | -2.46692600 |
| H | -5.74438800 | -0.53069500 | -1.39201100 |
| C | -3.96103100 | 1.97036900  | -2.78511200 |
| C | -5.06041900 | 1.15822000  | -2.48279800 |
| H | -4.06116100 | 2.80364300  | -3.47699500 |
| C | -6.42678700 | 1.38472900  | -3.09063700 |
| H | -6.87875400 | 2.31257500  | -2.71377000 |
| H | -6.36430500 | 1.48022500  | -4.18292100 |
| H | -7.09850900 | 0.55346500  | -2.84810700 |
| C | -4.37908500 | -3.21145100 | 0.96931200  |
| C | -3.19979100 | -3.40037100 | 1.69194300  |
| C | -5.39937600 | -4.17471300 | 1.05171900  |
| C | -3.03034000 | -4.54216000 | 2.48091500  |
| H | -2.41668600 | -2.65436000 | 1.63719600  |
| C | -5.22822400 | -5.30762000 | 1.84485800  |
| H | -6.31736000 | -4.00905900 | 0.48645100  |

|    |             |             |             |
|----|-------------|-------------|-------------|
| C  | -4.04149500 | -5.49933200 | 2.56079700  |
| H  | -2.10120500 | -4.67781700 | 3.03059300  |
| H  | -6.02378300 | -6.04819500 | 1.90004700  |
| H  | -3.90793400 | -6.38833300 | 3.17460300  |
| Br | -7.90136200 | -2.17513900 | -1.31662000 |
| C  | -4.65648300 | -2.00756200 | 0.10774000  |
| H  | -5.41280100 | -1.37142300 | 0.58534300  |
| H  | -5.10866300 | -2.33644800 | -0.83333500 |
| C  | -4.03778300 | 2.46861300  | 1.20952300  |
| C  | -4.91448400 | 2.02601900  | 2.19618200  |
| C  | -4.53390400 | 2.05709900  | 3.54042200  |
| C  | -3.27113500 | 2.54246500  | 3.89169100  |
| C  | -2.39278700 | 2.98182400  | 2.90580400  |
| C  | -2.75895000 | 2.94971000  | 1.54652100  |
| H  | -4.34331100 | 2.45706400  | 0.16914800  |
| H  | -5.89524600 | 1.65288000  | 1.91330700  |
| H  | -5.21841000 | 1.70630700  | 4.30939600  |
| H  | -2.97085500 | 2.57727700  | 4.93661300  |
| H  | -1.41633600 | 3.37019700  | 3.18099300  |
| C  | -1.82937500 | 3.39584300  | 0.51389900  |
| H  | -0.96973900 | 3.97865900  | 0.79951200  |
| H  | -2.18337100 | 3.51230300  | -0.49601900 |
| Br | -2.58136600 | 6.09737700  | 0.37984100  |

### TSa3

-2 1

|   | x           | y           | z           |
|---|-------------|-------------|-------------|
| C | 0.83924300  | -1.62470400 | 1.67331000  |
| C | -0.30762300 | -2.15884500 | 2.29739600  |
| C | -1.17004600 | -3.10398300 | 1.67334900  |
| C | -0.90110900 | -3.39205900 | 0.26453200  |
| C | 0.93816700  | -0.24499600 | 2.04481500  |
| C | -0.10575500 | 0.06285300  | 3.01491500  |
| C | -0.89872000 | -1.13220000 | 3.16214900  |
| C | -2.27928600 | -1.04925800 | 3.33818800  |
| C | -2.58589500 | -2.96550900 | 1.81720200  |
| C | -2.17223300 | -3.51085200 | -0.43121200 |
| C | -2.29924000 | -3.09131200 | -1.75974900 |
| C | -1.16136400 | -2.51384900 | -2.43209100 |
| C | 0.04898400  | -2.35553700 | -1.71996600 |
| C | 0.86265700  | -1.18845900 | -1.90018000 |
| C | 1.80518900  | -0.98438400 | -0.72039100 |
| C | 1.77455000  | 0.45819500  | -0.22211200 |
| C | 1.34835300  | 0.75074500  | 1.14317800  |

|   |             |             |             |
|---|-------------|-------------|-------------|
| C | -0.71595800 | 1.32461500  | 3.05675300  |
| C | -0.30234700 | 2.34505200  | 2.12256500  |
| C | 0.70001700  | 2.03796100  | 1.18201500  |
| C | 0.57324200  | 2.49715200  | -0.18557500 |
| C | 1.16024700  | 1.48615800  | -1.04121200 |
| C | 0.58179400  | 1.24404600  | -2.29698900 |
| C | 0.40621400  | -0.15501500 | -2.69967500 |
| C | -0.85886300 | -0.27452800 | -3.39883600 |
| C | -1.62788300 | -1.43498900 | -3.27001400 |
| C | -3.21998300 | -3.23810000 | 0.52590500  |
| C | -4.73454400 | 0.19940000  | -2.13840800 |
| C | -5.13488500 | -0.79054500 | -1.23215200 |
| C | -5.40458100 | -0.44472300 | 0.15876000  |
| C | -5.26663100 | 0.88565300  | 0.57600100  |
| C | -4.84934300 | 1.90801300  | -0.36299300 |
| C | -3.45106500 | 2.15531300  | -2.38250600 |
| C | -2.87903100 | 1.12873700  | -3.23821700 |
| C | -3.68051700 | -0.07954400 | -3.09431200 |
| C | -3.06854700 | -1.33673300 | -3.11718300 |
| C | -3.48492600 | -2.36541200 | -2.17745100 |
| C | -4.49434900 | -2.08986300 | -1.24882500 |
| C | -4.94852500 | -1.53332900 | 0.99780200  |
| C | -4.32586900 | -1.25623400 | 2.22976100  |
| C | -4.18519300 | 0.13078700  | 2.66666800  |
| C | -4.64464400 | 1.17364400  | 1.86023000  |
| C | -3.84937100 | 2.38252600  | 1.71462600  |
| C | -3.97528100 | 2.83426400  | 0.33572900  |
| C | -2.87080200 | 3.38652500  | -0.31787300 |
| C | -2.59773800 | 3.04423700  | -1.70967600 |
| C | -1.49321400 | 1.02819600  | -3.38283700 |
| C | -0.60221500 | 1.95724600  | -2.69468500 |
| C | -1.16417700 | 2.95425500  | -1.87212800 |
| C | -0.55231600 | 3.22539800  | -0.58657000 |
| C | -1.60179400 | 3.52147300  | 0.37462100  |
| C | -1.47711000 | 3.07276400  | 1.69624900  |
| C | -2.62877200 | 2.50145700  | 2.38050800  |
| C | -2.15218500 | 1.41703200  | 3.22478300  |
| C | -2.92063100 | 0.25574300  | 3.36721900  |
| C | -4.36640000 | -2.54251100 | 0.13102900  |
| C | -3.16329900 | -1.98601700 | 2.66184000  |
| C | -4.59429300 | 1.58175500  | -1.70392100 |
| C | 2.64118000  | -2.96135200 | 0.43486400  |
| C | 3.60425400  | -2.42772800 | -0.42389700 |
| C | 1.36090300  | -2.14428200 | 0.34526400  |



|    |            |             |             |
|----|------------|-------------|-------------|
| C  | 0.20198300 | -2.85683200 | -0.38759700 |
| O  | 3.17434900 | -1.36884700 | -1.15111800 |
| C  | 2.97282200 | -4.04666200 | 1.23299200  |
| C  | 4.90464400 | -2.92073700 | -0.48614300 |
| H  | 2.23818800 | -4.46218200 | 1.91881400  |
| H  | 5.64605400 | -2.40698500 | -1.09183800 |
| C  | 4.26571200 | -4.58408200 | 1.15901700  |
| C  | 5.23640900 | -4.02348400 | 0.31576400  |
| H  | 4.53036900 | -5.43552300 | 1.78372500  |
| C  | 6.64088400 | -4.58479600 | 0.26996300  |
| H  | 6.84541000 | -5.09007000 | -0.68462100 |
| H  | 7.38825100 | -3.78894500 | 0.37512400  |
| H  | 6.80670200 | -5.31443100 | 1.07131400  |
| C  | 4.02045600 | 3.56582300  | -0.75009200 |
| C  | 3.97147400 | 4.88608100  | -0.31793300 |
| C  | 3.98917900 | 5.18108200  | 1.04975900  |
| C  | 4.05014500 | 4.13967600  | 1.97840000  |
| C  | 4.10035900 | 2.81661300  | 1.54700000  |
| C  | 4.09673800 | 2.50378200  | 0.17340900  |
| H  | 4.01091300 | 3.33598800  | -1.81176700 |
| H  | 3.91462200 | 5.69093000  | -1.04759200 |
| H  | 3.94652900 | 6.21439700  | 1.38748200  |
| H  | 4.05192400 | 4.35884800  | 3.04382800  |
| H  | 4.14688400 | 2.00744800  | 2.26989300  |
| C  | 4.15648800 | 1.12964500  | -0.27638600 |
| H  | 4.26998800 | 0.32546700  | 0.42765000  |
| H  | 4.10829500 | 0.87568300  | -1.31889600 |
| Br | 6.74853300 | 0.79878400  | -0.64076200 |

#### TSa4-1

-2 1

|   | x           | y           | z           |
|---|-------------|-------------|-------------|
| C | -0.37675000 | 1.00750300  | 1.26878800  |
| C | 0.66471000  | 1.87221400  | 0.94671000  |
| C | 0.97227700  | 2.32010200  | -0.40125700 |
| C | 0.27834600  | 1.51789700  | -1.44931200 |
| C | 0.02407000  | 0.23183000  | 2.42534000  |
| C | 1.33340900  | 0.68884600  | 2.86637800  |
| C | 1.74257800  | 1.71249500  | 1.93747400  |
| C | 3.07206200  | 1.81986000  | 1.56235100  |
| C | 2.39192500  | 2.25257100  | -0.76537700 |
| C | 1.22995600  | 1.18770400  | -2.48979700 |
| C | 1.11491100  | 0.00760600  | -3.23563400 |
| C | 0.05605700  | -0.91587500 | -2.92261500 |

|   |             |             |             |
|---|-------------|-------------|-------------|
| C | -0.82426000 | -0.60709900 | -1.87433300 |
| C | -1.23982800 | -1.64763000 | -0.95149800 |
| C | -1.43338200 | -1.05997300 | 0.34430500  |
| C | -1.03439200 | -1.77175800 | 1.46095000  |
| C | -0.31162600 | -1.11227200 | 2.56407100  |
| C | 2.26764400  | -0.21056200 | 3.38739800  |
| C | 1.93052700  | -1.61520400 | 3.49840500  |
| C | 0.66276300  | -2.04723100 | 3.07439800  |
| C | 0.54423600  | -3.28474600 | 2.31641900  |
| C | -0.49985400 | -3.10937300 | 1.32811400  |
| C | -0.37898300 | -3.70721500 | 0.06702600  |
| C | -0.75902100 | -2.95473000 | -1.10209300 |
| C | 0.17984300  | -3.26607600 | -2.16878500 |
| C | 0.58043200  | -2.26665700 | -3.05429200 |
| C | 2.53556600  | 1.65105200  | -2.07329500 |
| C | 4.22116900  | -2.60486000 | -2.53177700 |
| C | 4.54086900  | -1.24811200 | -2.63790400 |
| C | 5.26305400  | -0.58315400 | -1.56055600 |
| C | 5.63961800  | -1.30618300 | -0.42612600 |
| C | 5.30132300  | -2.71354000 | -0.31561800 |
| C | 3.54243700  | -4.28596400 | -1.03593500 |
| C | 2.49329400  | -4.11653700 | -2.02676900 |
| C | 2.91261200  | -3.07609000 | -2.95139300 |
| C | 1.97333100  | -2.17028500 | -3.45375800 |
| C | 2.30512800  | -0.75880300 | -3.56187200 |
| C | 3.56592100  | -0.30978600 | -3.15998600 |
| C | 4.74519300  | 0.76624200  | -1.43325500 |
| C | 4.59231100  | 1.33634300  | -0.15932200 |
| C | 4.98831700  | 0.58395700  | 1.02335800  |
| C | 5.50079500  | -0.70757700 | 0.89335800  |
| C | 5.08586400  | -1.74850400 | 1.81984300  |
| C | 4.96054100  | -2.98848700 | 1.06897600  |
| C | 3.93224700  | -3.88402100 | 1.37113300  |
| C | 3.20897900  | -4.54706100 | 0.29850500  |
| C | 1.15208800  | -4.20668900 | -1.64481000 |
| C | 0.80500500  | -4.47906500 | -0.25652400 |
| C | 1.81610700  | -4.64275400 | 0.69386000  |
| C | 1.68033000  | -4.03980300 | 2.01188800  |
| C | 2.99076800  | -3.58285000 | 2.43835400  |
| C | 3.10813700  | -2.38855000 | 3.15681000  |
| C | 4.18296800  | -1.45624800 | 2.84360500  |
| C | 3.65906400  | -0.10896700 | 2.98773100  |
| C | 4.05236100  | 0.89070500  | 2.09175500  |
| C | 3.68912000  | 0.92891800  | -2.40685400 |

|    |             |             |             |
|----|-------------|-------------|-------------|
| C  | 3.41962000  | 2.10735600  | 0.16835300  |
| C  | 4.61099400  | -3.35586200 | -1.35033400 |
| C  | -2.76780000 | 1.20970400  | 0.35241500  |
| C  | -4.03784900 | 0.59356200  | 0.26646700  |
| C  | -1.39822200 | 0.48707800  | 0.24977900  |
| C  | -0.75353900 | 0.63843800  | -1.16293500 |
| O  | -4.11037700 | -0.77027100 | 0.13947800  |
| C  | -2.74337000 | 2.60408700  | 0.49465600  |
| C  | -5.20271800 | 1.38016800  | 0.31662600  |
| H  | -1.77852300 | 3.09085200  | 0.58434200  |
| H  | -6.18891600 | 0.92537000  | 0.24655000  |
| C  | -3.89545600 | 3.38208200  | 0.53785700  |
| C  | -5.14898900 | 2.76838800  | 0.44554200  |
| H  | -3.81285600 | 4.46250800  | 0.63574200  |
| C  | -6.44011100 | 3.55572800  | 0.48090800  |
| H  | -6.54408500 | 4.10779300  | 1.42529200  |
| H  | -6.47298300 | 4.29829300  | -0.32767800 |
| H  | -7.30241300 | 2.88822600  | 0.37503600  |
| C  | -5.44238000 | -2.82137000 | 0.01538300  |
| C  | -4.30101400 | -3.61661400 | 0.12763800  |
| C  | -6.69224200 | -3.43479600 | -0.17979100 |
| C  | -4.39662300 | -5.00862600 | 0.03340400  |
| H  | -3.33970200 | -3.14714700 | 0.29173000  |
| C  | -6.78292300 | -4.82220600 | -0.26865600 |
| H  | -7.57708500 | -2.80038300 | -0.24592400 |
| C  | -5.63536100 | -5.61661400 | -0.16651800 |
| H  | -3.49488200 | -5.61164800 | 0.11707500  |
| H  | -7.75535000 | -5.28676100 | -0.42047200 |
| H  | -5.70910400 | -6.70011500 | -0.24093600 |
| Br | -8.72860400 | -0.05460300 | 0.04559800  |
| C  | -5.44002900 | -1.31849900 | 0.12024100  |
| H  | -5.98121600 | -1.01295000 | 1.02399600  |
| H  | -6.01366500 | -0.89240200 | -0.70978300 |
| C  | 0.32837700  | 5.29261000  | 1.60076600  |
| C  | 0.88525300  | 5.85004400  | 2.74762100  |
| C  | 2.22975900  | 6.23192900  | 2.76427700  |
| C  | 3.00979800  | 6.05318400  | 1.61918200  |
| C  | 2.45393000  | 5.49512700  | 0.47109400  |
| C  | 1.10258200  | 5.10475600  | 0.44085700  |
| H  | -0.72018300 | 5.00945600  | 1.58967300  |
| H  | 0.26804700  | 5.98762600  | 3.63223900  |
| H  | 2.66493000  | 6.66581900  | 3.66165500  |
| H  | 4.05609800  | 6.35031400  | 1.62040900  |
| H  | 3.05983000  | 5.36825000  | -0.42110200 |

|    |             |            |             |
|----|-------------|------------|-------------|
| C  | 0.52693400  | 4.48694700 | -0.75013800 |
| H  | 1.08521800  | 4.44593200 | -1.66955400 |
| H  | -0.53032000 | 4.28469600 | -0.80474000 |
| Br | -0.23581200 | 6.76247500 | -1.92865100 |

**TSa4**

-2 1

|   | x           | y           | z           |
|---|-------------|-------------|-------------|
| C | 1.25189800  | 1.23438300  | 1.30932300  |
| C | 1.43847800  | -0.14702100 | 1.42832500  |
| C | 1.71797500  | -1.01346600 | 0.30405700  |
| C | 1.54143500  | -0.37400300 | -1.01138900 |
| C | 0.28180300  | 1.65692500  | 2.29142600  |
| C | -0.10462800 | 0.50283600  | 3.07638600  |
| C | 0.61151800  | -0.63231600 | 2.53020900  |
| C | 0.00383600  | -1.88249500 | 2.47582300  |
| C | 0.97257100  | -2.26178800 | 0.23380800  |
| C | 0.86515100  | -1.30005300 | -1.89774600 |
| C | 0.02087100  | -0.83120500 | -2.90962200 |
| C | -0.19895400 | 0.58637500  | -3.04864000 |
| C | 0.41929500  | 1.47028400  | -2.13441300 |
| C | -0.26651300 | 2.63017200  | -1.64265500 |
| C | 0.34148900  | 3.10614100  | -0.32916000 |
| C | -0.72718400 | 3.29009700  | 0.70104700  |
| C | -0.68274900 | 2.62721500  | 1.97121900  |
| C | -1.41378800 | 0.34044800  | 3.55498100  |
| C | -2.40811000 | 1.34931200  | 3.23973700  |
| C | -2.04508600 | 2.46230100  | 2.47253400  |
| C | -2.92977100 | 2.95653600  | 1.44448600  |
| C | -2.09528300 | 3.43269200  | 0.34416800  |
| C | -2.56844400 | 3.28661700  | -0.98411300 |
| C | -1.60492000 | 2.82077000  | -1.97254300 |
| C | -2.27597700 | 1.88791900  | -2.86526700 |
| C | -1.58357900 | 0.79609000  | -3.39805700 |
| C | 0.50714100  | -2.47038200 | -1.12733800 |
| C | -3.91176200 | -1.82462200 | -2.24689600 |
| C | -2.95080100 | -2.79979600 | -1.95370700 |
| C | -2.89690200 | -3.40334400 | -0.62876700 |
| C | -3.80933100 | -2.98962300 | 0.35001700  |
| C | -4.80660500 | -1.98226300 | 0.04683000  |
| C | -5.09325400 | 0.01931900  | -1.37838700 |
| C | -4.26624600 | 0.48791500  | -2.47553000 |
| C | -3.54423300 | -0.65383200 | -3.02037300 |
| C | -2.23179200 | -0.50096800 | -3.47825500 |

|   |             |             |             |
|---|-------------|-------------|-------------|
| C | -1.23360300 | -1.51396700 | -3.17231800 |
| C | -1.58818600 | -2.64009400 | -2.42277200 |
| C | -1.50572400 | -3.61969100 | -0.28393500 |
| C | -1.06511900 | -3.39957800 | 1.03468900  |
| C | -2.01889000 | -2.97555200 | 2.05171100  |
| C | -3.36066400 | -2.78158100 | 1.71878600  |
| C | -4.08759300 | -1.64498200 | 2.26551800  |
| C | -4.97526300 | -1.14650400 | 1.22501300  |
| C | -5.18787600 | 0.22624100  | 1.08558500  |
| C | -5.23970900 | 0.82993700  | -0.23899800 |
| C | -3.63513500 | 1.73373800  | -2.40167600 |
| C | -3.79886100 | 2.58415200  | -1.22133300 |
| C | -4.61287500 | 2.13003400  | -0.16456500 |
| C | -4.15081400 | 2.32376400  | 1.20102600  |
| C | -4.52514800 | 1.15948700  | 1.98357600  |
| C | -3.66719400 | 0.68066600  | 2.97996400  |
| C | -3.44541900 | -0.75074300 | 3.12390900  |
| C | -2.04922900 | -0.95413800 | 3.47908800  |
| C | -1.34914400 | -2.05470800 | 2.95779000  |
| C | -0.69685900 | -3.13970300 | -1.38341200 |
| C | 0.18633400  | -2.73258000 | 1.29341300  |
| C | -4.86267100 | -1.40352900 | -1.22851500 |
| C | 2.75107700  | 2.83725600  | -0.03559500 |
| C | 2.42292200  | 4.15288100  | -0.38654000 |
| C | 1.48401000  | 1.99342300  | 0.01466500  |
| C | 1.34640400  | 0.99113900  | -1.15184900 |
| O | 1.10176500  | 4.38216000  | -0.55639100 |
| C | 4.07862700  | 2.50380100  | 0.19649200  |
| C | 3.39904500  | 5.13738700  | -0.52784900 |
| H | 4.37471300  | 1.50010300  | 0.48884100  |
| H | 3.11021300  | 6.14941500  | -0.80203700 |
| C | 5.07024000  | 3.48565100  | 0.05651900  |
| C | 4.74359700  | 4.79781600  | -0.30546400 |
| H | 6.10788600  | 3.21120600  | 0.23047300  |
| C | 5.82192400  | 5.84914600  | -0.45659400 |
| H | 5.85025400  | 6.25793100  | -1.47626600 |
| H | 5.65920000  | 6.69867800  | 0.22114500  |
| H | 6.81217400  | 5.43474700  | -0.23807100 |
| C | 4.22795300  | -3.89130800 | 0.77400000  |
| C | 4.27790500  | -5.19928900 | 0.30617100  |
| C | 4.32546500  | -5.45726600 | -1.06819200 |
| C | 4.32117400  | -4.38761500 | -1.96793300 |
| C | 4.27321800  | -3.07709500 | -1.50248500 |
| C | 4.22432000  | -2.80180300 | -0.12089500 |

|    |            |             |             |
|----|------------|-------------|-------------|
| H  | 4.19289000 | -3.69334800 | 1.84187400  |
| H  | 4.27602900 | -6.02495000 | 1.01472000  |
| H  | 4.35946400 | -6.48141200 | -1.43318100 |
| H  | 4.35126600 | -4.57676100 | -3.03877800 |
| H  | 4.26898600 | -2.24784500 | -2.20420600 |
| C  | 4.16335500 | -1.43802100 | 0.36341600  |
| H  | 4.13923800 | -0.61651100 | -0.32912900 |
| H  | 4.04173800 | -1.22634100 | 1.41103500  |
| Br | 6.62648500 | -0.83273900 | 0.70609000  |

**TSa5**

-2 1

|   | x           | y           | z           |
|---|-------------|-------------|-------------|
| C | 0.82481600  | 0.61372400  | -1.33697200 |
| C | -0.17399200 | 1.54842400  | -1.57804900 |
| C | -0.65042700 | 2.51391500  | -0.59659700 |
| C | -0.20471000 | 2.19098100  | 0.77801100  |
| C | 0.52300000  | -0.57865600 | -2.10975400 |
| C | -0.65326500 | -0.31534500 | -2.92508000 |
| C | -1.10374800 | 1.00682400  | -2.57987500 |
| C | -2.46118300 | 1.29030500  | -2.52972500 |
| C | -2.10675800 | 2.63489200  | -0.49363300 |
| C | -1.32336400 | 2.33439400  | 1.68437400  |
| C | -1.42441500 | 1.56279900  | 2.84664400  |
| C | -0.42084500 | 0.56527300  | 3.10662900  |
| C | 0.62501500  | 0.38904900  | 2.17666600  |
| C | 1.09545500  | -0.92340700 | 1.85761400  |
| C | 1.88307700  | -0.92783500 | 0.55747400  |
| C | 1.57220600  | -2.19925100 | -0.38591900 |
| C | 0.75591800  | -1.85710900 | -1.64319300 |
| C | -1.57428700 | -1.32545900 | -3.21298300 |
| C | -1.35162000 | -2.65198000 | -2.69203700 |
| C | -0.21586600 | -2.88247500 | -1.90166500 |
| C | -0.31094600 | -3.72338700 | -0.72363100 |
| C | 0.61358800  | -3.22606800 | 0.25538500  |
| C | 0.23085200  | -3.21922100 | 1.58039000  |
| C | 0.49300700  | -2.02847700 | 2.41371200  |
| C | -0.61697200 | -1.87085500 | 3.32535500  |
| C | -1.06429300 | -0.59220200 | 3.67620100  |
| C | -2.50400400 | 2.62088300  | 0.89865500  |
| C | -4.59394200 | -1.05701800 | 2.71474700  |
| C | -4.80894400 | 0.23181500  | 2.21311500  |
| C | -5.29983200 | 0.41157200  | 0.85444100  |
| C | -5.56478000 | -0.70520900 | 0.05647300  |

|   |             |             |             |
|---|-------------|-------------|-------------|
| C | -5.34057000 | -2.04059200 | 0.57611000  |
| C | -3.85106400 | -3.21456900 | 2.15154200  |
| C | -2.94541200 | -2.67020800 | 3.15140400  |
| C | -3.41045400 | -1.33787500 | 3.50391600  |
| C | -2.48667500 | -0.32038200 | 3.76447100  |
| C | -2.71157800 | 1.01963100  | 3.24425100  |
| C | -3.85132100 | 1.28698700  | 2.48137200  |
| C | -4.65608100 | 1.58415000  | 0.29148200  |
| C | -4.26004200 | 1.58221800  | -1.05531400 |
| C | -4.53678600 | 0.41646400  | -1.88874500 |
| C | -5.17665100 | -0.69999200 | -1.34610500 |
| C | -4.72522100 | -2.03662400 | -1.69400900 |
| C | -4.82506300 | -2.86545500 | -0.50216600 |
| C | -3.84772600 | -3.82973700 | -0.23884200 |
| C | -3.35274200 | -4.01262100 | 1.11546000  |
| C | -1.57514700 | -2.92538100 | 3.05840900  |
| C | -1.05157200 | -3.75293900 | 1.98353600  |
| C | -1.92908000 | -4.28813300 | 1.03271200  |
| C | -1.54679000 | -4.27819200 | -0.35837200 |
| C | -2.73183600 | -4.00462700 | -1.15433900 |
| C | -2.63313000 | -3.20319100 | -2.29240800 |
| C | -3.65359900 | -2.20485100 | -2.57451300 |
| C | -2.99336700 | -1.04399800 | -3.14730800 |
| C | -3.42678800 | 0.24343100  | -2.80540600 |
| C | -3.75113100 | 2.11347300  | 1.28677300  |
| C | -2.99094600 | 2.13386000  | -1.45569200 |
| C | -4.86862500 | -2.21867300 | 1.88332000  |
| C | 3.05535800  | 1.07920500  | -0.14055300 |
| C | 3.91838000  | 0.17788200  | 0.47341000  |
| C | 1.62777900  | 0.56390900  | -0.05709800 |
| C | 0.77166600  | 1.24281500  | 1.03752200  |
| O | 3.28181200  | -0.95245200 | 0.93738300  |
| C | 3.57694900  | 2.24486000  | -0.69496400 |
| C | 5.28930900  | 0.38597600  | 0.58983900  |
| H | 2.93077200  | 2.95264000  | -1.20823300 |
| H | 5.95317800  | -0.33427400 | 1.07240400  |
| C | 4.94986600  | 2.48069600  | -0.59710000 |
| C | 5.81155300  | 1.56959400  | 0.04302900  |
| H | 5.36498100  | 3.38849800  | -1.03025200 |
| C | 7.29517000  | 1.85175200  | 0.13705100  |
| H | 7.48068000  | 2.75710000  | 0.73227000  |
| H | 7.83075300  | 1.01529700  | 0.60458700  |
| H | 7.72145300  | 2.03379400  | -0.85927100 |
| C | 2.74379600  | -5.37376400 | -1.15171700 |

|    |             |             |             |
|----|-------------|-------------|-------------|
| C  | 2.68549800  | -6.49542400 | -1.97944200 |
| C  | 2.73757900  | -6.34639500 | -3.36649300 |
| C  | 2.85137800  | -5.06804400 | -3.91540400 |
| C  | 2.90896800  | -3.94991100 | -3.08238000 |
| C  | 2.85190200  | -4.08266900 | -1.68782800 |
| H  | 2.70864900  | -5.49703400 | -0.07203100 |
| H  | 2.60450900  | -7.48665200 | -1.53917400 |
| H  | 2.69529800  | -7.21942900 | -4.01385100 |
| H  | 2.89863800  | -4.93899200 | -4.99424400 |
| H  | 3.00210300  | -2.95757100 | -3.51634400 |
| C  | 2.94472500  | -2.87257500 | -0.78375800 |
| H  | 3.55668900  | -2.10583000 | -1.26741100 |
| H  | 3.46261600  | -3.14149900 | 0.13898100  |
| Br | 8.47742900  | -1.30391900 | 1.91222300  |
| C  | -1.27159400 | 5.98964200  | 0.32545400  |
| C  | -1.37310900 | 6.68530800  | 1.52702100  |
| C  | -0.28885700 | 6.73174100  | 2.40735100  |
| C  | 0.89828100  | 6.07327100  | 2.07420700  |
| C  | 1.00178200  | 5.37739600  | 0.87352800  |
| C  | -0.08053300 | 5.32784900  | -0.02477000 |
| H  | -2.11070600 | 5.96531000  | -0.36419900 |
| H  | -2.30118100 | 7.19406100  | 1.77783500  |
| H  | -0.36887700 | 7.27406300  | 3.34664100  |
| H  | 1.74658800  | 6.10035000  | 2.75366000  |
| H  | 1.92649500  | 4.86690600  | 0.61894300  |
| C  | 0.02030200  | 4.57670600  | -1.26955500 |
| H  | 0.96297100  | 4.15823600  | -1.58003500 |
| H  | -0.78205100 | 4.58283100  | -1.98624200 |
| Br | 0.79539900  | 6.57290400  | -2.83585300 |

### TSa6

-2 1

|   | x           | y           | z           |
|---|-------------|-------------|-------------|
| C | -0.97910300 | 0.76067100  | 0.93257400  |
| C | -0.02346200 | 1.58603800  | 1.47828000  |
| C | 0.72546200  | 2.67579500  | 0.72043300  |
| C | 0.64061500  | 2.31486900  | -0.78205300 |
| C | -1.04751100 | -0.47936500 | 1.70891600  |
| C | -0.08642000 | -0.37810800 | 2.77948200  |
| C | 0.57117400  | 0.90435100  | 2.62619300  |
| C | 1.91815500  | 1.02992800  | 2.93461000  |
| C | 2.24193600  | 2.48084900  | 0.94847600  |
| C | 1.96067100  | 2.32965100  | -1.36171300 |
| C | 2.27515000  | 1.58756100  | -2.50509900 |



|   |             |             |             |
|---|-------------|-------------|-------------|
| C | 1.27411300  | 0.71773700  | -3.06233600 |
| C | 0.02062900  | 0.62723700  | -2.42815200 |
| C | -0.65500100 | -0.62965600 | -2.32313800 |
| C | -1.70819400 | -0.60650300 | -1.22010000 |
| C | -1.62511800 | -1.86348500 | -0.32818500 |
| C | -1.24685400 | -1.69603000 | 1.07443000  |
| C | 0.63706300  | -1.49108900 | 3.22594500  |
| C | 0.42181200  | -2.76843500 | 2.57846800  |
| C | -0.49580300 | -2.85769500 | 1.53013000  |
| C | -0.19744900 | -3.65251000 | 0.36577300  |
| C | -0.78207800 | -2.97822000 | -0.77650800 |
| C | -0.11204200 | -3.02257100 | -1.99483900 |
| C | -0.03338500 | -1.77967400 | -2.77280700 |
| C | 1.27818400  | -1.71296400 | -3.37740500 |
| C | 1.92144500  | -0.48015400 | -3.53527100 |
| C | 2.94249100  | 2.44560000  | -0.29834700 |
| C | 5.04287200  | -1.36919400 | -1.78177700 |
| C | 5.25889900  | -0.12982400 | -1.16701600 |
| C | 5.42068900  | -0.05125500 | 0.27648400  |
| C | 5.35145100  | -1.21458500 | 1.04796800  |
| C | 5.13556600  | -2.50056700 | 0.41313000  |
| C | 3.97302300  | -3.45241400 | -1.54898200 |
| C | 3.39801800  | -2.77322600 | -2.69901300 |
| C | 4.06595400  | -1.48902500 | -2.84696000 |
| C | 3.34049600  | -0.36578200 | -3.25929500 |
| C | 3.56144000  | 0.91953300  | -2.61634400 |
| C | 4.50441000  | 1.03345800  | -1.59346400 |
| C | 4.76253600  | 1.16024600  | 0.73472500  |
| C | 4.05354200  | 1.15809900  | 1.94199400  |
| C | 3.99059000  | -0.05057400 | 2.74773100  |
| C | 4.63340400  | -1.21189500 | 2.31458400  |
| C | 3.97751800  | -2.50055700 | 2.46391300  |
| C | 4.28406600  | -3.29417000 | 1.28244400  |
| C | 3.31379800  | -4.13433300 | 0.73253900  |
| C | 3.14696600  | -4.21021600 | -0.71012100 |
| C | 2.02897600  | -2.87785900 | -2.95854300 |
| C | 1.16976900  | -3.67626300 | -2.09143200 |
| C | 1.73104200  | -4.34730600 | -0.99403500 |
| C | 1.02207300  | -4.33155000 | 0.26669900  |
| C | 1.99424100  | -4.21243100 | 1.33986800  |
| C | 1.69953300  | -3.44925800 | 2.47129900  |
| C | 2.71096100  | -2.57398500 | 3.04594100  |
| C | 2.04551300  | -1.36782400 | 3.51364100  |
| C | 2.67691600  | -0.12121100 | 3.36564900  |

|    |             |             |             |
|----|-------------|-------------|-------------|
| C  | 4.19510100  | 1.82360800  | -0.41316000 |
| C  | 2.78074100  | 1.83328700  | 2.04400800  |
| C  | 4.97923700  | -2.57863700 | -0.97677900 |
| C  | -2.81123200 | 1.51527600  | -0.73580100 |
| C  | -3.59429300 | 0.70078200  | -1.55410800 |
| C  | -1.46636500 | 0.84396800  | -0.49738100 |
| C  | -0.30934900 | 1.46389500  | -1.30795100 |
| O  | -3.02063800 | -0.50116500 | -1.86481100 |
| C  | -3.30189400 | 2.75014400  | -0.33644200 |
| C  | -4.85546200 | 1.08040800  | -1.99599000 |
| H  | -2.75331600 | 3.44384700  | 0.29536800  |
| H  | -5.43365200 | 0.41470400  | -2.63145100 |
| C  | -4.56962300 | 3.15340200  | -0.77216400 |
| C  | -5.35153700 | 2.33440600  | -1.59503400 |
| H  | -4.90423800 | 4.13833100  | -0.45490100 |
| C  | -6.72602800 | 2.77810600  | -2.04539600 |
| H  | -6.85059100 | 2.66856400  | -3.13079500 |
| H  | -7.51720300 | 2.18016000  | -1.57219900 |
| H  | -6.90253800 | 3.82714800  | -1.78766600 |
| C  | 2.25285900  | 5.63937400  | 0.58383000  |
| C  | 2.82827400  | 6.69000300  | -0.13269100 |
| C  | 2.06613000  | 7.39969700  | -1.06263700 |
| C  | 0.72504600  | 7.06111600  | -1.24988700 |
| C  | 0.14922700  | 6.00787100  | -0.53598900 |
| C  | 0.91456300  | 5.26865600  | 0.37945600  |
| H  | 2.85139600  | 5.10357600  | 1.31638000  |
| H  | 3.86941000  | 6.95572400  | 0.04087700  |
| H  | 2.51030000  | 8.22090000  | -1.62253300 |
| H  | 0.11083300  | 7.62908700  | -1.94515900 |
| H  | -0.91815700 | 5.81031700  | -0.61750500 |
| C  | 0.27504400  | 4.12660500  | 1.14759800  |
| H  | -0.81415500 | 4.22320100  | 1.08340700  |
| H  | 0.52362100  | 4.21062600  | 2.21362300  |
| Br | -3.11283300 | 6.03164000  | 1.02149600  |
| C  | -3.99360700 | -3.35819600 | 2.15397700  |
| C  | -4.50990900 | -2.98533100 | 3.39107700  |
| C  | -5.22282600 | -1.79023600 | 3.52325500  |
| C  | -5.41852700 | -0.97611000 | 2.40478500  |
| C  | -4.90526100 | -1.34962700 | 1.16541000  |
| C  | -4.18255300 | -2.54740100 | 1.01879000  |
| H  | -3.45379500 | -4.29477400 | 2.04714200  |
| H  | -4.35700900 | -3.62783100 | 4.25545600  |
| H  | -5.62101900 | -1.49445300 | 4.49124400  |
| H  | -5.96754100 | -0.04257400 | 2.49778400  |

|    |             |             |             |
|----|-------------|-------------|-------------|
| H  | -5.06389600 | -0.71336400 | 0.30065600  |
| C  | -3.59925900 | -2.92726400 | -0.26420000 |
| H  | -3.89841400 | -2.43080400 | -1.17121600 |
| H  | -3.12344900 | -3.88805600 | -0.35644900 |
| Br | -5.60136400 | -4.65595500 | -1.05947600 |

**IM10**

-2 1

|   | x           | y           | z           |
|---|-------------|-------------|-------------|
| C | -1.38212000 | 0.19327700  | -0.26797600 |
| C | -0.97127300 | -0.92799600 | 0.68176300  |
| C | -0.43851500 | -0.69893000 | 1.95548400  |
| C | -0.04467100 | 0.63320200  | 2.37081300  |
| C | -0.79625200 | -0.27824300 | -1.60233500 |
| C | -0.42786800 | -1.65587800 | -1.48089700 |
| C | -0.53735400 | -2.04729600 | -0.07967900 |
| C | 0.36504600  | -2.99739100 | 0.44340900  |
| C | 0.51598900  | -1.64232300 | 2.50193600  |
| C | 1.16553400  | 0.51037500  | 3.16104600  |
| C | 2.18885300  | 1.46188200  | 3.07083600  |
| C | 2.05192500  | 2.57491300  | 2.14983000  |
| C | 0.88388800  | 2.64628200  | 1.35452800  |
| C | 0.99518100  | 3.03737300  | -0.04498500 |
| C | -0.01158500 | 2.35643000  | -0.79997400 |
| C | 0.28258700  | 1.90489900  | -2.07623100 |
| C | -0.11747200 | 0.54464500  | -2.47979600 |
| C | 0.56808200  | -2.21305500 | -2.29100700 |
| C | 1.26616500  | -1.36009200 | -3.22722600 |
| C | 0.92982300  | -0.00025800 | -3.31100800 |
| C | 1.98318800  | 0.99300200  | -3.41160300 |
| C | 1.57905800  | 2.16400800  | -2.65152100 |
| C | 2.55010900  | 2.88657900  | -1.93610400 |
| C | 2.24893000  | 3.33500400  | -0.59637400 |
| C | 3.44933200  | 3.24300000  | 0.21585300  |
| C | 3.33538600  | 2.85386300  | 1.57256000  |
| C | 1.50762700  | -0.89941500 | 3.26208900  |
| C | 5.63901800  | -0.03465900 | 1.42442600  |
| C | 4.94927300  | -0.86402600 | 2.32368400  |
| C | 4.54705700  | -2.19923100 | 1.91718000  |
| C | 4.84604200  | -2.65548300 | 0.62220900  |
| C | 5.54396800  | -1.78836200 | -0.31195600 |
| C | 5.80677800  | 0.61567000  | -0.84165500 |
| C | 5.40893900  | 1.76749200  | -0.08069500 |
| C | 5.29415300  | 1.36791800  | 1.32135400  |

|   |             |             |             |
|---|-------------|-------------|-------------|
| C | 4.28376700  | 1.90286800  | 2.12510300  |
| C | 3.57469000  | 1.04520400  | 3.06662100  |
| C | 3.90425900  | -0.31463800 | 3.15907900  |
| C | 3.25137200  | -2.47210100 | 2.49784000  |
| C | 2.29278300  | -3.19185000 | 1.76828300  |
| C | 2.60133900  | -3.65888500 | 0.42270800  |
| C | 3.85418700  | -3.39195400 | -0.13536200 |
| C | 3.96591200  | -3.00595500 | -1.53954100 |
| C | 5.00573600  | -2.01869800 | -1.64669700 |
| C | 4.87291200  | -0.93041200 | -2.53768000 |
| C | 5.27473000  | 0.39435100  | -2.13509300 |
| C | 4.48795500  | 2.69453500  | -0.61026300 |
| C | 3.93455800  | 2.46517700  | -1.94450200 |
| C | 4.32033800  | 1.34028500  | -2.67886000 |
| C | 3.32157800  | 0.59534300  | -3.43398900 |
| C | 3.66558500  | -0.81516900 | -3.33622000 |
| C | 2.65406300  | -1.77423400 | -3.23755300 |
| C | 2.79654500  | -2.90225900 | -2.32096000 |
| C | 1.50844300  | -3.17809100 | -1.74650100 |
| C | 1.40006200  | -3.55005300 | -0.38671300 |
| C | 2.84686800  | -1.30480600 | 3.26206800  |
| C | 0.91025400  | -2.76945300 | 1.77035100  |
| C | 5.93146200  | -0.50501300 | 0.07908700  |
| C | -3.09899200 | 4.79775600  | 0.97977100  |
| C | -2.02737300 | 3.94784600  | 0.73392000  |
| C | -2.21623400 | 2.60276100  | 0.38446100  |
| C | -3.55123100 | 2.14770700  | 0.27932600  |
| C | -4.64511500 | 3.02068900  | 0.55033900  |
| C | -4.43390400 | 4.33814300  | 0.90011000  |
| C | -0.99962900 | 1.67251900  | 0.17610600  |
| C | -3.80813100 | 0.81317100  | -0.13485200 |
| C | -0.17277700 | 1.70982000  | 1.48755600  |
| O | -2.87420900 | -0.03291500 | -0.46380200 |
| O | -5.05436600 | 0.41537900  | -0.22230400 |
| C | -5.58622200 | 5.27118400  | 1.18771200  |
| H | -6.54870500 | 4.77066900  | 1.04370600  |
| H | -5.55161600 | 5.64368900  | 2.22059500  |
| H | -5.56280300 | 6.15064000  | 0.53035500  |
| H | -5.65098000 | 2.62484000  | 0.46195200  |
| H | -2.90293200 | 5.83541900  | 1.24226800  |
| H | -1.01985400 | 4.33525900  | 0.82230400  |
| C | -5.43397100 | -0.95832900 | -0.62523100 |
| H | -6.34761500 | -0.80683300 | -1.21517100 |
| H | -4.62660500 | -1.36271100 | -1.23671800 |

|    |             |             |             |
|----|-------------|-------------|-------------|
| C  | -5.70946800 | -1.79715000 | 0.59884400  |
| C  | -7.03836500 | -2.06619100 | 0.95672900  |
| C  | -4.66249100 | -2.30928300 | 1.37947500  |
| C  | -7.30709600 | -2.83779700 | 2.08994500  |
| H  | -7.84290200 | -1.68547700 | 0.32206000  |
| C  | -4.93880400 | -3.07294200 | 2.51351500  |
| H  | -3.62995200 | -2.11252000 | 1.10068300  |
| C  | -6.26360700 | -3.33741600 | 2.87152900  |
| H  | -8.33986400 | -3.04876600 | 2.35964400  |
| H  | -4.11949000 | -3.46369200 | 3.11250200  |
| H  | -6.47887300 | -3.93590000 | 3.75514000  |
| Br | -8.90268800 | -0.70135500 | -1.91203200 |

**IM11-1**

-2 1

|   | x           | y           | z           |
|---|-------------|-------------|-------------|
| C | -2.14599000 | 0.00100000  | -1.39176600 |
| C | -2.75366300 | -0.28651700 | 0.01573400  |
| C | -4.31071500 | -0.45287300 | -0.01166000 |
| C | -5.26186700 | 0.59379900  | 0.03997200  |
| C | -2.05228800 | -1.53086200 | 0.58601800  |
| C | -1.43331400 | -1.55194600 | 1.86455600  |
| C | -1.24765100 | -0.39165800 | 2.64353200  |
| C | -1.61077900 | 0.89348400  | 2.02448700  |
| C | -1.37364100 | -2.47201700 | -0.23019700 |
| C | -0.36521800 | -3.17372300 | 0.57066100  |
| C | -0.40165300 | -2.59406800 | 1.88723600  |
| C | 0.77687800  | -2.41732300 | 2.61423000  |
| C | -0.01294000 | -0.20531600 | 3.34592900  |
| C | -0.60608700 | 1.86958400  | 2.41141300  |
| C | -0.21641300 | 2.87690400  | 1.51926800  |
| C | -0.80965100 | 2.92554700  | 0.20639400  |
| C | -1.75125900 | 1.95402100  | -0.15435500 |
| C | -1.71204800 | 1.36484300  | -1.48150500 |
| C | -1.50139500 | -0.95634700 | -2.16152700 |
| C | -1.13708500 | -2.27009500 | -1.60743100 |
| C | 0.84497300  | -3.57149400 | 0.00225900  |
| C | 1.11295300  | -3.31414900 | -1.39989300 |
| C | 0.12979800  | -2.64133500 | -2.16229200 |
| C | 0.54859000  | -1.59780600 | -3.09800400 |
| C | -0.46351400 | -0.56636300 | -3.09816600 |
| C | -0.09301500 | 0.77990800  | -3.22722800 |
| C | -0.73918600 | 1.77078400  | -2.40392300 |
| C | 0.26030400  | 2.75852400  | -2.01585300 |

|   |             |             |             |
|---|-------------|-------------|-------------|
| C | 0.22570700  | 3.31779400  | -0.73973100 |
| C | 0.38411200  | 1.19681900  | 3.21780200  |
| C | 3.67774600  | 2.45316800  | 0.25570900  |
| C | 3.41159600  | 2.18958300  | 1.60428200  |
| C | 3.78268600  | 0.90318600  | 2.18077600  |
| C | 4.41743300  | -0.05759500 | 1.38689100  |
| C | 4.68374300  | 0.21723000  | -0.01358300 |
| C | 3.73367600  | 1.50381600  | -1.89182700 |
| C | 2.72000100  | 2.54539300  | -1.88939800 |
| C | 2.68432300  | 3.13167000  | -0.56054500 |
| C | 1.45988400  | 3.50876100  | 0.00087000  |
| C | 1.18293800  | 3.23658300  | 1.40334600  |
| C | 2.14264100  | 2.58230400  | 2.18507200  |
| C | 2.76060500  | 0.51612500  | 3.13486300  |
| C | 2.37811200  | -0.83089100 | 3.23782000  |
| C | 3.03906600  | -1.83331300 | 2.41158100  |
| C | 4.03255400  | -1.45641200 | 1.50583400  |
| C | 4.06638700  | -2.04454300 | 0.17592000  |
| C | 4.47370200  | -1.00851000 | -0.76240200 |
| C | 3.89237000  | -0.96124800 | -2.03377400 |
| C | 3.52179600  | 0.32368200  | -2.61458100 |
| C | 1.52787300  | 2.36082700  | -2.59845900 |
| C | 1.30729500  | 1.13460500  | -3.35155700 |
| C | 2.28662600  | 0.13476800  | -3.34924800 |
| C | 1.90060300  | -1.26383600 | -3.22873000 |
| C | 2.90548300  | -1.94689600 | -2.43286000 |
| C | 2.50048100  | -2.93606900 | -1.52121900 |
| C | 3.10677900  | -2.98740900 | -0.19611700 |
| C | 2.07847000  | -3.38661200 | 0.74990800  |
| C | 2.04456800  | -2.82100400 | 2.02733700  |
| C | 1.73572100  | 1.54639700  | 3.12199300  |
| C | 0.98889600  | -1.20206900 | 3.37538200  |
| C | 4.33445200  | 1.45574600  | -0.57036200 |
| C | -6.15069000 | -2.07541800 | -0.09126000 |
| C | -4.79187600 | -1.77204600 | -0.06970200 |
| C | -6.62562400 | 0.25619700  | 0.07471500  |
| C | -7.09986500 | -1.05214400 | -0.01280700 |
| C | -4.99397900 | 2.12148900  | 0.00295100  |
| C | -2.20562800 | 0.95490300  | 0.77585900  |
| O | -4.17802700 | 2.50305600  | -0.87983000 |
| O | -5.67985200 | 2.80853100  | 0.79185000  |
| C | -8.58321400 | -1.34850400 | -0.03885300 |
| H | -8.80833200 | -2.32778700 | 0.40369200  |
| H | -9.15061600 | -0.59004500 | 0.51388500  |

|   |             |             |             |
|---|-------------|-------------|-------------|
| H | -8.98112200 | -1.36158500 | -1.06495700 |
| H | -7.32093800 | 1.08498800  | 0.18427800  |
| H | -6.46871400 | -3.11677200 | -0.14883800 |
| H | -4.07669500 | -2.58769400 | -0.08292200 |

**IM11**

-2 1

|   | x           | y           | z           |
|---|-------------|-------------|-------------|
| C | -2.24085200 | 0.66987800  | 1.05204400  |
| C | -1.67021100 | 1.95248300  | 0.78498900  |
| C | -1.39583600 | 2.41041600  | -0.51234900 |
| C | -1.60325200 | 1.47908400  | -1.62888100 |
| C | -1.61458200 | 0.16425200  | 2.21581900  |
| C | -0.70753300 | 1.18583300  | 2.76214200  |
| C | -0.75005300 | 2.30977700  | 1.86313400  |
| C | 0.40037200  | 3.06109400  | 1.61191000  |
| C | -0.19637500 | 3.14461100  | -0.77048200 |
| C | -0.53068600 | 1.68214400  | -2.58139400 |
| C | 0.00491100  | 0.60395700  | -3.30188200 |
| C | -0.50950200 | -0.71875600 | -3.06182900 |
| C | -1.52810900 | -0.89012400 | -2.10701100 |
| C | -1.46549800 | -2.01954700 | -1.19300500 |
| C | -2.02159000 | -1.61296000 | 0.06274300  |
| C | -1.44975000 | -2.07952400 | 1.23518400  |
| C | -1.26981100 | -1.20170900 | 2.39352900  |
| C | 0.48439800  | 0.83054900  | 3.38964900  |
| C | 0.85483200  | -0.56911400 | 3.52595100  |
| C | -0.01628200 | -1.54681100 | 2.99273600  |
| C | 0.56079100  | -2.67818700 | 2.26209300  |
| C | -0.33453600 | -3.00744500 | 1.18070000  |
| C | 0.17046700  | -3.44438500 | -0.05189500 |
| C | -0.41417700 | -2.94759900 | -1.27151800 |
| C | 0.65533900  | -2.74247000 | -2.23881200 |
| C | 0.60933800  | -1.65397600 | -3.10802100 |
| C | 0.34452300  | 2.70535800  | -2.05588900 |
| C | 3.90010000  | -0.21442700 | -2.23738300 |
| C | 3.53661300  | 1.13365800  | -2.35072400 |
| C | 3.74325200  | 2.03878400  | -1.22647700 |
| C | 4.31674400  | 1.56003400  | -0.04466500 |
| C | 4.68339500  | 0.16023400  | 0.07084700  |
| C | 3.97249600  | -2.04570400 | -0.76880100 |
| C | 3.06904600  | -2.38016200 | -1.85724000 |
| C | 3.02305700  | -1.24582800 | -2.76562500 |
| C | 1.81625100  | -0.89193000 | -3.37847700 |

|   |             |             |             |
|---|-------------|-------------|-------------|
| C | 1.43949200  | 0.50811900  | -3.49990900 |
| C | 2.28421000  | 1.49679700  | -2.98249900 |
| C | 2.63992000  | 2.97975900  | -1.18314600 |
| C | 2.11940400  | 3.38600600  | 0.05723700  |
| C | 2.71793500  | 2.89009900  | 1.28973800  |
| C | 3.78912400  | 1.99618900  | 1.24069300  |
| C | 3.83179900  | 0.86148700  | 2.14837000  |
| C | 4.39115800  | -0.27210200 | 1.42492700  |
| C | 3.88737600  | -1.55583500 | 1.65783800  |
| C | 3.68017700  | -2.46435000 | 0.53437100  |
| C | 1.90675100  | -3.11358100 | -1.60057500 |
| C | 1.60379800  | -3.55015800 | -0.24565300 |
| C | 2.47409200  | -3.22098300 | 0.79995800  |
| C | 1.94451400  | -2.78437800 | 2.08628500  |
| C | 2.83216900  | -1.77350600 | 2.62722900  |
| C | 2.27435100  | -0.67406600 | 3.30922900  |
| C | 2.80058400  | 0.66426500  | 3.06843300  |
| C | 1.69046900  | 1.59976900  | 3.12620200  |
| C | 1.64930700  | 2.69094600  | 2.25493200  |
| C | 1.72539400  | 2.62960500  | -2.25547900 |
| C | 0.69614900  | 3.50138200  | 0.26419300  |
| C | 4.49628100  | -0.71273500 | -1.01129500 |
| C | -6.15189000 | -2.08433900 | -0.04053400 |
| C | -4.79156300 | -1.77839500 | -0.08534300 |
| C | -4.31020900 | -0.45907000 | -0.07785900 |
| C | -5.26259700 | 0.58751000  | -0.00805200 |
| C | -6.62140200 | 0.25094400  | 0.08262800  |
| C | -7.09732100 | -1.06131500 | 0.04855300  |
| C | -2.75872700 | -0.24752000 | -0.06874300 |
| C | -4.98817400 | 2.11214200  | -0.10656200 |
| C | -2.13963500 | 0.21872900  | -1.42620000 |
| O | -4.19347400 | 2.43628900  | -1.02424000 |
| O | -5.65670500 | 2.83290800  | 0.66943800  |
| C | -8.58029400 | -1.35726700 | 0.09544400  |
| H | -8.77589700 | -2.38502500 | 0.42765300  |
| H | -9.10238600 | -0.67671900 | 0.77968200  |
| H | -9.05386000 | -1.24031800 | -0.89095900 |
| H | -7.31167700 | 1.08376300  | 0.19600600  |
| H | -6.46914400 | -3.12733800 | -0.05507700 |
| H | -4.08518300 | -2.60176900 | -0.11200600 |

**IM12-1**

-2 1

x

y

z



|   |             |             |             |
|---|-------------|-------------|-------------|
| C | -0.82987200 | 1.08329400  | -1.24510600 |
| C | -1.07307400 | -0.30751000 | -1.03224000 |
| C | -1.21497000 | -0.87467400 | 0.24468800  |
| C | -0.98106900 | -0.00866300 | 1.40730800  |
| C | 0.07691900  | 1.19054500  | -2.32848300 |
| C | 0.32675300  | -0.14670600 | -2.88744700 |
| C | -0.40105000 | -1.08428200 | -2.07305600 |
| C | 0.12669400  | -2.34801200 | -1.80271700 |
| C | -0.63421000 | -2.15167300 | 0.52536700  |
| C | -0.28059300 | -0.78979100 | 2.40856400  |
| C | 0.68737900  | -0.19936600 | 3.23281600  |
| C | 0.99943800  | 1.19474100  | 3.05444600  |
| C | 0.32890000  | 1.91946100  | 2.05397900  |
| C | 1.07888300  | 2.85171300  | 1.22724300  |
| C | 0.50764300  | 2.84800600  | -0.08651600 |
| C | 1.34435200  | 2.95227700  | -1.18518000 |
| C | 1.12175100  | 2.14760800  | -2.38844600 |
| C | 1.57060800  | -0.48793900 | -3.41365700 |
| C | 2.65297300  | 0.48255500  | -3.42665800 |
| C | 2.41066200  | 1.76314100  | -2.88182700 |
| C | 3.44047600  | 2.37543900  | -2.03978300 |
| C | 2.77443800  | 3.11522700  | -0.99630900 |
| C | 3.32171800  | 3.17380600  | 0.29264500  |
| C | 2.45328700  | 3.04917200  | 1.43574000  |
| C | 3.14687500  | 2.26876300  | 2.45139000  |
| C | 2.43722400  | 1.36263800  | 3.23690100  |
| C | -0.06118900 | -2.11262600 | 1.86960600  |
| C | 4.47746300  | -1.62286100 | 2.47606100  |
| C | 3.43135000  | -2.55369100 | 2.47161400  |
| C | 3.21332400  | -3.39671700 | 1.30254300  |
| C | 4.05918400  | -3.28230900 | 0.19547600  |
| C | 5.13605500  | -2.30893300 | 0.20150300  |
| C | 5.66877200  | -0.09545900 | 1.14707800  |
| C | 4.99757800  | 0.65236300  | 2.19726400  |
| C | 4.25932700  | -0.29279600 | 3.01929700  |
| C | 3.00499900  | 0.05786400  | 3.52928000  |
| C | 1.91817900  | -0.90971000 | 3.52770900  |
| C | 2.13147500  | -2.18609800 | 2.99648900  |
| C | 1.78479000  | -3.57693600 | 1.12468300  |
| C | 1.24226200  | -3.60065100 | -0.17081300 |
| C | 2.12326600  | -3.48428300 | -1.32609600 |
| C | 3.49863400  | -3.32597900 | -1.14792000 |
| C | 4.23446000  | -2.37863400 | -1.96972700 |
| C | 5.25070100  | -1.75413500 | -1.13468400 |

|   |             |             |             |
|---|-------------|-------------|-------------|
| C | 5.55070300  | -0.39957900 | -1.30758400 |
| C | 5.77110100  | 0.44643700  | -0.13963900 |
| C | 4.45062000  | 1.90886900  | 1.92044600  |
| C | 4.55785700  | 2.47249500  | 0.58277700  |
| C | 5.19999800  | 1.74672000  | -0.42665300 |
| C | 4.63725300  | 1.70307500  | -1.77096900 |
| C | 4.87508800  | 0.38395200  | -2.32357700 |
| C | 3.87508100  | -0.21306700 | -3.11388900 |
| C | 3.56445500  | -1.62629800 | -2.93613300 |
| C | 2.13475500  | -1.79809800 | -3.12829600 |
| C | 1.42784000  | -2.70841600 | -2.33952200 |
| C | 1.11510900  | -2.80927400 | 2.15887800  |
| C | 0.01101500  | -2.91226200 | -0.47365200 |
| C | 5.35672000  | -1.50249500 | 1.32721800  |
| C | -2.66478800 | 5.51774800  | -0.16732000 |
| C | -1.71629200 | 4.50292200  | -0.04239700 |
| C | -2.03537900 | 3.14163400  | -0.17374900 |
| C | -3.38723700 | 2.81554300  | -0.44549100 |
| C | -4.31318300 | 3.85539200  | -0.61259400 |
| C | -3.99109100 | 5.20622000  | -0.46632300 |
| C | -0.86255000 | 2.10761200  | -0.09812700 |
| C | -4.01056900 | 1.40582300  | -0.48364800 |
| C | -0.72446600 | 1.34461000  | 1.26057100  |
| O | -3.66224400 | 0.63203600  | 0.43839900  |
| O | -4.88730000 | 1.21724400  | -1.37521700 |
| C | -5.04493400 | 6.28112800  | -0.61396500 |
| H | -4.59362500 | 7.26294400  | -0.80443100 |
| H | -5.72997900 | 6.05869500  | -1.44146000 |
| H | -5.66113200 | 6.37663700  | 0.29215000  |
| H | -5.32485700 | 3.56009500  | -0.87858700 |
| H | -2.35707100 | 6.55696500  | -0.05211000 |
| H | -0.68747400 | 4.78966500  | 0.14670700  |
| C | -5.45254600 | -1.72375800 | -0.33278300 |
| H | -4.54361700 | -2.08431900 | 0.14318100  |
| H | -5.22318700 | -0.89745100 | -1.00618700 |
| C | -6.55303500 | -1.39100900 | 0.62772400  |
| C | -7.06710700 | -0.08677700 | 0.64028800  |
| C | -7.05696100 | -2.33033200 | 1.53895000  |
| C | -8.06871000 | 0.26328700  | 1.54866700  |
| H | -6.64618500 | 0.63559200  | -0.05619800 |
| C | -8.05686800 | -1.97869900 | 2.44376200  |
| H | -6.67162500 | -3.34688200 | 1.51729300  |
| C | -8.56830300 | -0.67742100 | 2.45083100  |
| H | -8.45585300 | 1.28028900  | 1.55348100  |

|    |             |             |             |
|----|-------------|-------------|-------------|
| H  | -8.43763500 | -2.71902200 | 3.14516600  |
| H  | -9.34803700 | -0.40046700 | 3.15836900  |
| Br | -6.00632700 | -3.27977000 | -1.52582200 |

**IM12**

-2 1

|   | x           | y           | z           |
|---|-------------|-------------|-------------|
| C | -0.57994200 | 1.54446700  | 1.31347100  |
| C | -0.81170200 | 2.19424300  | -0.08673200 |
| C | -2.01415700 | 3.19334300  | -0.12313800 |
| C | -3.37712800 | 2.83999900  | -0.25287000 |
| C | 0.50270300  | 2.86253400  | -0.52014300 |
| C | 1.12660800  | 2.60035800  | -1.76809500 |
| C | 0.69777800  | 1.58013000  | -2.64191700 |
| C | -0.36090700 | 0.68408600  | -2.15065300 |
| C | 1.52260000  | 3.22076600  | 0.39963700  |
| C | 2.80911700  | 3.28226400  | -0.30084700 |
| C | 2.56074200  | 2.89082300  | -1.66313300 |
| C | 3.49707000  | 2.12846500  | -2.36187500 |
| C | 1.67495600  | 0.77428900  | -3.31292500 |
| C | -0.03654700 | -0.66331700 | -2.58325900 |
| C | -0.34017000 | -1.76348500 | -1.77036700 |
| C | -0.95671500 | -1.54194200 | -0.48731300 |
| C | -1.22623900 | -0.23080000 | -0.07653800 |
| C | -0.97737900 | 0.16572500  | 1.29769300  |
| C | 0.42630700  | 1.93555800  | 2.18441600  |
| C | 1.49874200  | 2.85017200  | 1.76101100  |
| C | 3.98885900  | 2.90797700  | 0.34199200  |
| C | 3.95866200  | 2.47034000  | 1.72451000  |
| C | 2.71236700  | 2.42034800  | 2.38965000  |
| C | 2.40930100  | 1.27308100  | 3.24398300  |
| C | 0.99944900  | 0.98281500  | 3.11808900  |
| C | 0.55263600  | -0.34547400 | 3.14269700  |
| C | -0.46752300 | -0.76266600 | 2.21414100  |
| C | -0.15390700 | -2.11698000 | 1.77609600  |
| C | -0.39239700 | -2.49624700 | 0.45715900  |
| C | 1.21973500  | -0.61515800 | -3.29423400 |
| C | 3.02564400  | -3.64952800 | -0.33722700 |
| C | 3.05610200  | -3.21205600 | -1.66638600 |
| C | 4.11971600  | -2.32200000 | -2.11474700 |
| C | 5.11504500  | -1.92130600 | -1.21820000 |
| C | 5.07519600  | -2.37174200 | 0.16142000  |
| C | 3.43031300  | -3.00774500 | 1.88606200  |
| C | 2.01333700  | -3.30452500 | 1.75641900  |

|   |             |             |             |
|---|-------------|-------------|-------------|
| C | 1.76313500  | -3.70129600 | 0.38081700  |
| C | 0.58261400  | -3.30277800 | -0.25365100 |
| C | 0.61334600  | -2.84811600 | -1.63586700 |
| C | 1.83108000  | -2.79851300 | -2.32225700 |
| C | 3.56006900  | -1.38043400 | -3.06642300 |
| C | 3.99529100  | -0.04560000 | -3.06444300 |
| C | 5.03432800  | 0.37284900  | -2.13141200 |
| C | 5.57772400  | -0.54134600 | -1.22735900 |
| C | 5.82947400  | -0.14401200 | 0.14892800  |
| C | 5.52039100  | -1.27866900 | 1.00692200  |
| C | 4.91408700  | -1.06169600 | 2.24816900  |
| C | 3.85100500  | -1.95055300 | 2.70122400  |
| C | 1.07171800  | -2.52625500 | 2.43733200  |
| C | 1.50822400  | -1.42683700 | 3.28574600  |
| C | 2.87346500  | -1.14421300 | 3.40536400  |
| C | 3.33589500  | 0.23615100  | 3.39351400  |
| C | 4.60871000  | 0.28411900  | 2.69600800  |
| C | 4.89145300  | 1.37724600  | 1.86114800  |
| C | 5.52585000  | 1.15249600  | 0.56781900  |
| C | 4.96757900  | 2.10671900  | -0.37512200 |
| C | 4.72678700  | 1.72524500  | -1.69790300 |
| C | 2.13983000  | -1.66213400 | -3.17837800 |
| C | 3.05929000  | 1.04301300  | -3.21838600 |
| C | 4.05780800  | -3.23248400 | 0.59554600  |
| C | -2.67314800 | 5.55695300  | -0.10384300 |
| C | -1.70118000 | 4.56111700  | -0.05692400 |
| C | -4.33428300 | 3.86362000  | -0.35202300 |
| C | -4.02035400 | 5.21927800  | -0.26040600 |
| C | -3.98286800 | 1.42343700  | -0.24024000 |
| C | -0.98714800 | 0.89854300  | -0.93201700 |
| O | -3.70286300 | 0.70669900  | 0.75182900  |
| O | -4.77712400 | 1.16731200  | -1.18811900 |
| C | -5.09903200 | 6.27821100  | -0.31294600 |
| H | -4.73724200 | 7.20094800  | -0.78476400 |
| H | -5.97143900 | 5.92964400  | -0.87794400 |
| H | -5.45436800 | 6.54970300  | 0.69230700  |
| H | -5.36435200 | 3.55627600  | -0.51512500 |
| H | -2.37398300 | 6.60312800  | -0.03911500 |
| H | -0.65873500 | 4.85233500  | 0.01575700  |
| C | -6.41214100 | -0.92790600 | 0.49360600  |
| C | -5.90461000 | -2.21298700 | -0.08916300 |
| C | -6.33477100 | -3.47344600 | 0.34782400  |
| C | -4.89721000 | -2.13211300 | -1.06176100 |
| C | -5.76916000 | -4.63509400 | -0.17545400 |

|    |             |             |             |
|----|-------------|-------------|-------------|
| H  | -7.13198700 | -3.53577400 | 1.08450300  |
| C  | -4.32530600 | -3.29827400 | -1.57539200 |
| H  | -4.56935000 | -1.14571500 | -1.38222200 |
| C  | -4.75826800 | -4.55069800 | -1.13735900 |
| H  | -6.11386900 | -5.60796800 | 0.17077600  |
| H  | -3.52952500 | -3.22185100 | -2.31208500 |
| H  | -4.30857300 | -5.45686100 | -1.53849300 |
| H  | -6.14802000 | -0.06703100 | -0.12290200 |
| H  | -6.08923400 | -0.76054500 | 1.51951800  |
| Br | -8.43820400 | -0.90544300 | 0.63844600  |

**IM13-1**

-2 1

|   | x           | y           | z           |
|---|-------------|-------------|-------------|
| C | -0.89785900 | 0.27305000  | 0.96205100  |
| C | -0.19456100 | 0.15211100  | 2.19206400  |
| C | 0.64351700  | 1.16006000  | 2.72351800  |
| C | 0.91276000  | 2.31254900  | 1.86068300  |
| C | -0.84325800 | -1.00397600 | 0.32477600  |
| C | -0.22167700 | -1.97505300 | 1.22518000  |
| C | 0.19041400  | -1.25094500 | 2.39806400  |
| C | 1.37584800  | -1.58584300 | 3.05095800  |
| C | 1.88660100  | 0.80045600  | 3.34419200  |
| C | 2.30450100  | 2.69368200  | 2.01939000  |
| C | 3.03205300  | 3.20452300  | 0.93725300  |
| C | 2.39283100  | 3.33137100  | -0.34817900 |
| C | 1.05922700  | 2.92069800  | -0.48722700 |
| C | 0.62441100  | 2.20386100  | -1.67448500 |
| C | -0.42803400 | 1.29393800  | -1.30390300 |
| C | -0.41558500 | 0.02654400  | -1.86325600 |
| C | -0.68123300 | -1.17248900 | -1.06066900 |
| C | 0.55363200  | -3.02341200 | 0.72813700  |
| C | 0.74959400  | -3.16888900 | -0.69995700 |
| C | 0.15165300  | -2.22433800 | -1.55942800 |
| C | 0.91489100  | -1.71322800 | -2.69510000 |
| C | 0.55938100  | -0.32473900 | -2.87975300 |
| C | 1.52720500  | 0.59919300  | -3.29304500 |
| C | 1.56070000  | 1.90077800  | -2.67598000 |
| C | 2.95815100  | 2.28496800  | -2.50923300 |
| C | 3.36458800  | 2.98641300  | -1.37639700 |
| C | 2.91366100  | 1.75733100  | 2.93219200  |
| C | 6.01635700  | 0.65645500  | -0.29083800 |
| C | 5.81725300  | 0.78909300  | 1.08788500  |
| C | 5.56457000  | -0.39130600 | 1.90503700  |

|   |             |             |             |
|---|-------------|-------------|-------------|
| C | 5.53480000  | -1.65441000 | 1.30804400  |
| C | 5.73347100  | -1.78673800 | -0.12412200 |
| C | 5.33606600  | -0.52506300 | -2.20451100 |
| C | 4.98064400  | 0.87141500  | -2.39158300 |
| C | 5.40237500  | 1.60263600  | -1.20744400 |
| C | 4.60871900  | 2.64049900  | -0.71124800 |
| C | 4.40182500  | 2.77839100  | 0.72275300  |
| C | 4.99029100  | 1.86314900  | 1.60128400  |
| C | 4.60765000  | -0.03973000 | 2.93749400  |
| C | 3.61707700  | -0.96286300 | 3.31396900  |
| C | 3.58748800  | -2.28114100 | 2.69262300  |
| C | 4.52211100  | -2.61819000 | 1.71254100  |
| C | 4.10271500  | -3.35102800 | 0.52867000  |
| C | 4.85464300  | -2.83674300 | -0.60684600 |
| C | 4.23029600  | -2.70931700 | -1.85077300 |
| C | 4.48134300  | -1.53059800 | -2.67007700 |
| C | 3.78241000  | 1.20842100  | -3.02956100 |
| C | 2.89423100  | 0.16381800  | -3.51626600 |
| C | 3.23788400  | -1.17843400 | -3.32715900 |
| C | 2.22534600  | -2.14307600 | -2.91954000 |
| C | 2.84388900  | -3.10245200 | -2.02319100 |
| C | 2.11442200  | -3.58125800 | -0.92377300 |
| C | 2.76566800  | -3.71751800 | 0.37312800  |
| C | 1.79421600  | -3.37366100 | 1.39780300  |
| C | 2.19672600  | -2.66931300 | 2.53417200  |
| C | 4.23643400  | 1.34728600  | 2.73685700  |
| C | 2.25653300  | -0.54497800 | 3.55074200  |
| C | 5.98514800  | -0.65614000 | -0.91213100 |
| C | -3.21426700 | 4.63275500  | 0.71715100  |
| C | -2.11568500 | 3.79393500  | 0.53340900  |
| C | -2.23243400 | 2.42373100  | 0.25670500  |
| C | -3.55649600 | 1.92070400  | 0.16037600  |
| C | -4.65229100 | 2.77048200  | 0.37505800  |
| C | -4.51212800 | 4.13146400  | 0.65388100  |
| C | -0.91145000 | 1.58586100  | 0.15754500  |
| C | -3.92005900 | 0.53483000  | -0.29461800 |
| C | 0.29417800  | 2.45146000  | 0.63033300  |
| O | -5.04037300 | 0.10318000  | 0.30607500  |
| O | -3.32591600 | -0.06954300 | -1.16795100 |
| C | -5.72239600 | 5.00457200  | 0.88963700  |
| H | -5.45045100 | 6.06625300  | 0.90698100  |
| H | -6.47954800 | 4.86135000  | 0.10936200  |
| H | -6.20468600 | 4.76894000  | 1.84742200  |
| H | -5.64476200 | 2.33749100  | 0.30938200  |

|    |             |             |             |
|----|-------------|-------------|-------------|
| H  | -3.04742000 | 5.68820400  | 0.92749800  |
| H  | -1.12690100 | 4.22644600  | 0.62759900  |
| C  | -5.64919700 | -1.14734300 | -0.16016500 |
| H  | -6.21966400 | -1.50458800 | 0.70387000  |
| H  | -4.83940200 | -1.83650400 | -0.41072800 |
| C  | -6.57074200 | -0.91100900 | -1.33886300 |
| C  | -6.06592100 | -0.71488800 | -2.63491200 |
| C  | -7.95885000 | -0.89912700 | -1.13431500 |
| C  | -6.93235600 | -0.49230000 | -3.70586300 |
| H  | -4.99204900 | -0.73127000 | -2.79313400 |
| C  | -8.82047300 | -0.68112200 | -2.21298600 |
| H  | -8.35162900 | -1.09957700 | -0.13293200 |
| C  | -8.31401200 | -0.47182500 | -3.49691100 |
| H  | -6.52766800 | -0.33971100 | -4.70480200 |
| H  | -9.89550200 | -0.68132600 | -2.04358400 |
| H  | -8.99026200 | -0.30139000 | -4.33359200 |
| Br | -8.52766700 | -2.10489800 | 2.27754800  |

**IM13**

-2 1

|   | x           | y           | z           |
|---|-------------|-------------|-------------|
| C | 0.04121900  | 2.11557800  | 1.26453400  |
| C | -0.95529900 | 1.73961500  | 0.12328800  |
| C | -2.25898300 | 2.58235100  | 0.27165500  |
| C | -3.58522600 | 2.15050300  | 0.04569300  |
| C | -0.24587000 | 1.94461500  | -1.22606300 |
| C | -0.13890800 | 0.90053700  | -2.19118700 |
| C | -0.53666000 | -0.42400100 | -1.93867800 |
| C | -0.95852400 | -0.75560300 | -0.57308100 |
| C | 0.90894700  | 2.75830400  | -1.35372700 |
| C | 1.70418000  | 2.29688900  | -2.50027400 |
| C | 1.04363600  | 1.13085600  | -3.02541700 |
| C | 1.78815700  | 0.06148800  | -3.52628400 |
| C | 0.25811800  | -1.51249800 | -2.42294800 |
| C | -0.45442400 | -2.07794400 | -0.25682500 |
| C | -0.04172800 | -2.39117500 | 1.04389500  |
| C | -0.10337200 | -1.37504700 | 2.06344900  |
| C | -0.57202700 | -0.09607100 | 1.72454400  |
| C | 0.10401800  | 1.07796300  | 2.25117300  |
| C | 1.14157600  | 2.93781900  | 1.08313600  |
| C | 1.58530200  | 3.34198300  | -0.25557000 |
| C | 3.09616300  | 2.37371200  | -2.48474600 |
| C | 3.78870500  | 2.92855400  | -1.33512500 |
| C | 3.01858200  | 3.36622700  | -0.23580400 |

|   |             |             |             |
|---|-------------|-------------|-------------|
| C | 3.47556000  | 3.04820900  | 1.11714800  |
| C | 2.31019800  | 2.79141800  | 1.92912600  |
| C | 2.34409800  | 1.81245900  | 2.93012900  |
| C | 1.21225700  | 0.93682400  | 3.10110600  |
| C | 1.71249200  | -0.39270000 | 3.42380700  |
| C | 1.07151300  | -1.51934500 | 2.91434400  |
| C | 0.30265200  | -2.54875000 | -1.39384400 |
| C | 4.01421300  | -3.04501500 | 1.28342000  |
| C | 3.34872500  | -3.56377900 | 0.16716300  |
| C | 3.79560100  | -3.21236400 | -1.17481000 |
| C | 4.89667700  | -2.36811300 | -1.34218600 |
| C | 5.57785700  | -1.82461900 | -0.18076800 |
| C | 5.09404400  | -1.14158200 | 2.13799500  |
| C | 3.92035100  | -1.39646100 | 2.95632200  |
| C | 3.25174700  | -2.57428600 | 2.42740600  |
| C | 1.85516700  | -2.63304100 | 2.40839900  |
| C | 1.16277000  | -3.17422400 | 1.24953100  |
| C | 1.90052200  | -3.62037100 | 0.14855100  |
| C | 2.62904300  | -3.08029400 | -2.02765000 |
| C | 2.59127900  | -2.07467400 | -3.00565700 |
| C | 3.73957200  | -1.19521400 | -3.18255600 |
| C | 4.86440900  | -1.33634100 | -2.36866200 |
| C | 5.53019200  | -0.15716900 | -1.83826100 |
| C | 5.97548100  | -0.46259800 | -0.48677200 |
| C | 5.91379500  | 0.52380500  | 0.50133100  |
| C | 5.46892300  | 0.17452000  | 1.84513400  |
| C | 3.16371900  | -0.32805700 | 3.44551100  |
| C | 3.55382200  | 1.04038200  | 3.14141300  |
| C | 4.68069100  | 1.28139600  | 2.34864700  |
| C | 4.64730000  | 2.31344800  | 1.32015800  |
| C | 5.42743600  | 1.85388800  | 0.18711400  |
| C | 4.97810500  | 2.14333000  | -1.11269700 |
| C | 5.04607800  | 1.11534800  | -2.14456800 |
| C | 3.88007300  | 1.26192400  | -2.99855200 |
| C | 3.23973200  | 0.13012700  | -3.50747900 |
| C | 1.45627000  | -3.31261300 | -1.20440500 |
| C | 1.39284800  | -1.30176700 | -3.23356300 |
| C | 5.15788500  | -2.16687000 | 1.11123500  |
| C | -3.17153300 | 4.76391100  | 0.93412900  |
| C | -2.09817300 | 3.90960800  | 0.70824400  |
| C | -4.66370800 | 3.01194600  | 0.32200700  |
| C | -4.48678700 | 4.32097800  | 0.76369600  |
| C | -3.97633500 | 0.86103800  | -0.62244900 |
| C | -1.07550100 | 0.21221700  | 0.41195100  |



|    |             |             |             |
|----|-------------|-------------|-------------|
| O  | -5.06563200 | 0.33155300  | -0.03950100 |
| O  | -3.43020000 | 0.42220100  | -1.61663200 |
| C  | -5.66812000 | 5.21861200  | 1.05045500  |
| H  | -5.57101700 | 6.18682300  | 0.54217500  |
| H  | -6.60484700 | 4.75777300  | 0.72211800  |
| H  | -5.76206600 | 5.42794000  | 2.12487200  |
| H  | -5.66795100 | 2.63066000  | 0.16636400  |
| H  | -2.97902400 | 5.78419000  | 1.26353500  |
| H  | -1.09598400 | 4.28233600  | 0.88540400  |
| C  | -5.77693900 | -0.75370100 | -0.72030900 |
| C  | -5.70613800 | -2.01987800 | 0.09894700  |
| C  | -6.88674100 | -2.60430200 | 0.57717600  |
| C  | -4.47397400 | -2.63172400 | 0.37062200  |
| C  | -6.82427000 | -3.78913500 | 1.31670100  |
| H  | -7.84254600 | -2.12367600 | 0.35384100  |
| C  | -4.41654400 | -3.80849900 | 1.11626600  |
| H  | -3.55726100 | -2.18406600 | -0.00481200 |
| C  | -5.59516900 | -4.39164000 | 1.59128500  |
| H  | -7.74532500 | -4.23845700 | 1.68326100  |
| H  | -3.45231800 | -4.26799500 | 1.32285600  |
| H  | -5.55224300 | -5.31188700 | 2.17190200  |
| H  | -5.31509200 | -0.88436200 | -1.70171900 |
| H  | -6.81538300 | -0.41500800 | -0.82596400 |
| Br | -9.55476500 | -0.33999300 | -0.78846500 |

#### IM14

-2 1

|   | x           | y           | z           |
|---|-------------|-------------|-------------|
| C | 0.12507600  | 0.65006900  | -1.53620800 |
| C | 1.03574700  | 0.25726300  | -0.33452800 |
| C | 2.47945100  | 0.79506000  | -0.54621700 |
| C | 3.66127300  | 0.16604400  | -0.10318200 |
| C | 0.36774500  | 0.75534900  | 0.95839600  |
| C | 0.07971500  | -0.11756600 | 2.05108600  |
| C | 0.23824800  | -1.51067600 | 1.97938600  |
| C | 0.60172900  | -2.08947700 | 0.67928300  |
| C | -0.61940000 | 1.76769000  | 0.95579500  |
| C | -1.48571000 | 1.60682000  | 2.13328000  |
| C | -1.04183100 | 0.42283100  | 2.82110600  |
| C | -1.96376700 | -0.42470100 | 3.43826300  |
| C | -0.73422900 | -2.37256300 | 2.58235600  |
| C | -0.12873100 | -3.33225400 | 0.52410600  |
| C | -0.59008200 | -3.73550300 | -0.73470800 |
| C | -0.34928300 | -2.88762000 | -1.87493300 |

|   |             |             |             |
|---|-------------|-------------|-------------|
| C | 0.33761400  | -1.67731400 | -1.69344400 |
| C | -0.12087500 | -0.48140700 | -2.38120800 |
| C | -0.81224800 | 1.66981000  | -1.49080500 |
| C | -1.17743700 | 2.32193200  | -0.22687300 |
| C | -2.84078100 | 1.92264700  | 2.07374200  |
| C | -3.42383100 | 2.43772800  | 0.84525000  |
| C | -2.58761700 | 2.58770600  | -0.28281500 |
| C | -3.09191600 | 2.17905100  | -1.59387600 |
| C | -1.98894800 | 1.61770500  | -2.33617800 |
| C | -2.19435400 | 0.53805500  | -3.20456500 |
| C | -1.23515300 | -0.53677300 | -3.23337800 |
| C | -1.96140900 | -1.78878800 | -3.39325000 |
| C | -1.52979300 | -2.93460000 | -2.72885000 |
| C | -0.95911200 | -3.50994100 | 1.69322000  |
| C | -4.69742500 | -3.69526900 | -0.98659100 |
| C | -4.13559800 | -4.17282600 | 0.20309100  |
| C | -4.51497900 | -3.57577400 | 1.47678900  |
| C | -5.44940200 | -2.53697300 | 1.50738400  |
| C | -6.02373800 | -2.03992400 | 0.27003300  |
| C | -5.42312100 | -1.76105700 | -2.10498000 |
| C | -4.31202600 | -2.32201600 | -2.85506700 |
| C | -3.86243600 | -3.51880400 | -2.16266000 |
| C | -2.49819800 | -3.81778300 | -2.10273700 |
| C | -1.91344000 | -4.31596500 | -0.86701100 |
| C | -2.71982800 | -4.47878600 | 0.26402800  |
| C | -3.34401400 | -3.53920800 | 2.33393300  |
| C | -3.13102000 | -2.43716900 | 3.17561400  |
| C | -4.10596400 | -1.35481500 | 3.21028200  |
| C | -5.23659700 | -1.40160400 | 2.39333600  |
| C | -5.68378600 | -0.20405700 | 1.70015500  |
| C | -6.17486700 | -0.60114000 | 0.38870500  |
| C | -5.93735100 | 0.22127500  | -0.71596400 |
| C | -5.55960500 | -0.37321400 | -1.99263300 |
| C | -3.37842800 | -1.47541300 | -3.45923500 |
| C | -3.52095700 | -0.03179500 | -3.34293800 |
| C | -4.58916000 | 0.50418900  | -2.61618100 |
| C | -4.37494700 | 1.63939100  | -1.72793800 |
| C | -5.22492200 | 1.47552100  | -0.56467800 |
| C | -4.73216600 | 1.84948900  | 0.69759000  |
| C | -4.98151500 | 0.99269100  | 1.85091900  |
| C | -3.80986500 | 1.04289500  | 2.70758000  |
| C | -3.38029400 | -0.10680200 | 3.37416200  |
| C | -2.22953100 | -4.07931800 | 1.57627400  |
| C | -1.81498400 | -1.86217900 | 3.33115300  |

|    |             |             |             |
|----|-------------|-------------|-------------|
| C  | -5.66833700 | -2.61642900 | -0.95678600 |
| C  | 3.88876400  | 2.56670400  | -1.49477800 |
| C  | 2.63806800  | 1.99978000  | -1.25119200 |
| C  | 4.92112200  | 0.71677300  | -0.39465800 |
| C  | 5.05989700  | 1.92614100  | -1.07647700 |
| C  | 3.74670600  | -1.01687000 | 0.81550600  |
| C  | 0.88269900  | -1.29215500 | -0.41798500 |
| O  | 4.59613800  | -1.93917100 | 0.31685700  |
| O  | 3.22232200  | -1.08872000 | 1.90986700  |
| C  | 6.43931000  | 2.48898300  | -1.33660900 |
| H  | 6.52294900  | 3.52354500  | -0.97635800 |
| H  | 7.20109900  | 1.88103900  | -0.83473600 |
| H  | 6.66691500  | 2.50616500  | -2.41192700 |
| H  | 5.81782100  | 0.20422700  | -0.04346000 |
| H  | 3.93522300  | 3.51858700  | -2.02182400 |
| H  | 1.76121800  | 2.50936100  | -1.63577500 |
| C  | 5.19736500  | -2.85939500 | 1.26725900  |
| C  | 5.77285200  | -4.01935100 | 0.49665100  |
| C  | 7.01745200  | -3.88594800 | -0.13798500 |
| C  | 5.07775500  | -5.23029900 | 0.39733800  |
| C  | 7.54882600  | -4.95933100 | -0.85451000 |
| H  | 7.55656600  | -2.93954200 | -0.04822200 |
| C  | 5.61224100  | -6.30249200 | -0.32032900 |
| H  | 4.10887500  | -5.33062400 | 0.88288600  |
| C  | 6.85187100  | -6.16741500 | -0.94838100 |
| H  | 8.51591200  | -4.85026100 | -1.34106900 |
| H  | 5.06099500  | -7.23819600 | -0.39004100 |
| H  | 7.27258000  | -7.00073900 | -1.50885500 |
| H  | 4.43597300  | -3.17997500 | 1.98282700  |
| H  | 5.98942000  | -2.29781700 | 1.77560600  |
| Br | 8.26472600  | -0.51101700 | 0.87333000  |
| C  | 1.50936900  | 7.31661900  | 1.16584200  |
| C  | 0.99740800  | 8.32577500  | 1.97725500  |
| C  | -0.34690300 | 8.30184200  | 2.36183400  |
| C  | -1.17212900 | 7.26383500  | 1.92864700  |
| C  | -0.65903200 | 6.25288900  | 1.11344500  |
| C  | 0.68733800  | 6.26794100  | 0.72718000  |
| H  | 2.55164400  | 7.33758700  | 0.85705400  |
| H  | 1.64670200  | 9.13054400  | 2.31405600  |
| H  | -0.74581600 | 9.08790900  | 2.99884000  |
| H  | -2.21702700 | 7.23450400  | 2.22680400  |
| H  | -1.29951700 | 5.43911100  | 0.78304500  |
| C  | 1.23604200  | 5.15498400  | -0.10600800 |
| H  | 2.17724700  | 4.75019000  | 0.26300400  |

|    |            |            |             |
|----|------------|------------|-------------|
| H  | 0.51790500 | 4.35114800 | -0.25766800 |
| Br | 1.69424500 | 5.77587400 | -1.96405900 |

**IM15**

-2 1

|   | x           | y           | z           |
|---|-------------|-------------|-------------|
| C | -1.27364000 | -1.77423100 | -1.92044300 |
| C | -0.07275300 | -0.89765800 | -1.45376400 |
| C | 1.23259900  | -1.39220200 | -2.13779700 |
| C | 2.49303800  | -1.50224400 | -1.51741000 |
| C | -0.40982100 | 0.57705100  | -1.72865700 |
| C | -0.37207600 | 1.56613200  | -0.70518900 |
| C | -0.16630800 | 1.26219200  | 0.65433500  |
| C | -0.12372400 | -0.15549000 | 1.02951000  |
| C | -1.41881100 | 0.95938600  | -2.65087100 |
| C | -1.95034500 | 2.27524300  | -2.27170500 |
| C | -1.29156900 | 2.65553600  | -1.04944500 |
| C | -1.98711600 | 3.34724900  | -0.05752000 |
| C | -0.91837100 | 1.95153700  | 1.66043400  |
| C | -0.80849400 | -0.30660700 | 2.29948700  |
| C | -1.55257500 | -1.46020600 | 2.57422800  |
| C | -1.64725900 | -2.49183000 | 1.57260600  |
| C | -0.99634500 | -2.30974300 | 0.34259700  |
| C | -1.66876400 | -2.68820500 | -0.88908300 |
| C | -2.21540000 | -1.35647900 | -2.84586700 |
| C | -2.28380100 | 0.04085300  | -3.29065300 |
| C | -3.29145500 | 2.59388900  | -2.48063800 |
| C | -4.18774900 | 1.62945500  | -3.09321100 |
| C | -3.67053800 | 0.36583900  | -3.45149200 |
| C | -4.46837800 | -0.82849500 | -3.17490600 |
| C | -3.56314600 | -1.89098900 | -2.80699400 |
| C | -3.92869100 | -2.82832800 | -1.83205300 |
| C | -2.95712800 | -3.24341100 | -0.85155900 |
| C | -3.64007700 | -3.40013800 | 0.42584200  |
| C | -3.00117700 | -3.03130900 | 1.60742900  |
| C | -1.30654000 | 0.99119600  | 2.69208000  |
| C | -5.58778900 | -0.69916200 | 2.84002400  |
| C | -4.72209600 | 0.23736400  | 3.41631000  |
| C | -4.79593500 | 1.63804500  | 3.01976000  |
| C | -5.74080600 | 2.04236000  | 2.07279900  |
| C | -6.63101700 | 1.06600800  | 1.47126700  |
| C | -6.66323500 | -1.31833700 | 0.84533600  |
| C | -5.75125900 | -2.38843300 | 1.21334300  |
| C | -5.08533700 | -2.00512900 | 2.44775900  |

|   |             |             |             |
|---|-------------|-------------|-------------|
| C | -3.73731700 | -2.32205700 | 2.63958700  |
| C | -2.83725800 | -1.34929600 | 3.23964300  |
| C | -3.32391000 | -0.09158300 | 3.60962800  |
| C | -3.45017100 | 2.18095700  | 2.99691000  |
| C | -3.08369100 | 3.09303300  | 1.99461800  |
| C | -4.06977700 | 3.51803300  | 1.00908000  |
| C | -5.36602200 | 3.00277100  | 1.04505500  |
| C | -6.03068200 | 2.61912500  | -0.18991500 |
| C | -6.81619900 | 1.42284900  | 0.07652900  |
| C | -6.90468800 | 0.42303800  | -0.89589900 |
| C | -6.83292500 | -0.97844600 | -0.50159200 |
| C | -5.04081000 | -3.07262900 | 0.22324100  |
| C | -5.21848800 | -2.72028800 | -1.17750900 |
| C | -6.09316400 | -1.68628500 | -1.52737200 |
| C | -5.71752500 | -0.72379200 | -2.55532500 |
| C | -6.23764000 | 0.57574800  | -2.17504000 |
| C | -5.46233700 | 1.72089300  | -2.42432500 |
| C | -5.37222500 | 2.76576800  | -1.41160500 |
| C | -4.02568700 | 3.30990000  | -1.44981500 |
| C | -3.38739500 | 3.67829000  | -0.26382600 |
| C | -2.53860300 | 1.10568700  | 3.34178500  |
| C | -1.80059500 | 3.00451800  | 1.33913300  |
| C | -6.57040900 | -0.28001100 | 1.85644200  |
| C | 2.24585000  | -2.33610000 | -4.15711900 |
| C | 1.14975000  | -1.81667600 | -3.47368500 |
| C | 3.58295500  | -2.07456900 | -2.19567000 |
| C | 3.48372600  | -2.49309800 | -3.52398900 |
| C | 2.83479000  | -0.92227600 | -0.17852500 |
| C | -0.16692600 | -1.16365500 | 0.07924700  |
| O | 3.33296300  | -1.86114100 | 0.65364700  |
| O | 2.77013000  | 0.25930300  | 0.10403300  |
| C | 4.67937700  | -3.09290200 | -4.22857300 |
| H | 4.86014900  | -2.59857600 | -5.19288200 |
| H | 5.58085600  | -3.00158500 | -3.61125200 |
| H | 4.51875900  | -4.15962800 | -4.44085800 |
| H | 4.54318200  | -2.17877200 | -1.69100100 |
| H | 2.12701300  | -2.64062400 | -5.19652200 |
| H | 0.19680700  | -1.74833700 | -3.98781400 |
| C | 3.90885500  | -1.36653900 | 1.88687000  |
| C | 4.58799900  | -2.51444600 | 2.58858300  |
| C | 5.69288200  | -3.14981300 | 2.00121500  |
| C | 4.13400000  | -2.94575900 | 3.83993900  |
| C | 6.32240500  | -4.20078400 | 2.66773600  |
| H | 6.06774600  | -2.84200900 | 1.02242100  |

|    |            |             |             |
|----|------------|-------------|-------------|
| C  | 4.77211100 | -3.99352500 | 4.50833500  |
| H  | 3.27144900 | -2.45989400 | 4.29225100  |
| C  | 5.86940300 | -4.62434500 | 3.92056300  |
| H  | 7.17399300 | -4.68411800 | 2.19517600  |
| H  | 4.40726200 | -4.31796400 | 5.48083000  |
| H  | 6.36782000 | -5.44382600 | 4.43544600  |
| H  | 3.11228800 | -0.93149200 | 2.49953500  |
| H  | 4.61594000 | -0.56943000 | 1.63654400  |
| Br | 7.29476800 | -2.54044500 | -1.33952200 |
| C  | 5.90699800 | 2.00003200  | -0.10396700 |
| C  | 6.67258600 | 0.86228700  | -0.36408800 |
| C  | 8.00884800 | 0.80888500  | 0.03487500  |
| C  | 8.58334000 | 1.90209000  | 0.69109200  |
| C  | 7.82105300 | 3.03847100  | 0.95477800  |
| C  | 6.47390000 | 3.09596100  | 0.56413600  |
| H  | 4.85859800 | 2.02108600  | -0.39251100 |
| H  | 6.26754800 | -0.01011400 | -0.87067900 |
| H  | 8.55770100 | -0.10595200 | -0.17589800 |
| H  | 9.62534100 | 1.86787300  | 1.00358100  |
| H  | 8.26633800 | 3.89582400  | 1.45647500  |
| C  | 5.63102900 | 4.27475400  | 0.90650000  |
| H  | 4.58426700 | 4.14013100  | 0.64103300  |
| H  | 5.72235700 | 4.59368800  | 1.94419600  |
| Br | 6.17176600 | 5.96041300  | -0.09679100 |

### IM16

-2 1

|   | x           | y           | z           |
|---|-------------|-------------|-------------|
| C | -0.39245400 | 0.29111700  | -2.34796700 |
| C | 0.64002700  | 0.43781600  | -1.18825400 |
| C | 2.04732600  | 0.76008100  | -1.76364400 |
| C | 3.27966100  | 0.22566000  | -1.33403000 |
| C | 0.14583900  | 1.53480700  | -0.22952600 |
| C | -0.03621600 | 1.29628100  | 1.16347800  |
| C | 0.08542200  | 0.02373800  | 1.75007000  |
| C | 0.27103900  | -1.11880600 | 0.84819100  |
| C | -0.81704900 | 2.50168400  | -0.62368800 |
| C | -1.54028200 | 2.97651700  | 0.56299400  |
| C | -1.04856900 | 2.21931300  | 1.68384400  |
| C | -1.91154700 | 1.83119900  | 2.70904200  |
| C | -0.83558000 | -0.37783800 | 2.77272100  |
| C | -0.50191200 | -2.23034000 | 1.36746200  |
| C | -1.11664200 | -3.13801500 | 0.49676600  |
| C | -0.99005700 | -2.94445500 | -0.92543000 |

|   |             |             |             |
|---|-------------|-------------|-------------|
| C | -0.25644800 | -1.84724100 | -1.40214200 |
| C | -0.76183100 | -1.08211800 | -2.53009400 |
| C | -1.29355800 | 1.28241600  | -2.70160600 |
| C | -1.49664500 | 2.47098700  | -1.86332800 |
| C | -2.88660100 | 3.33147100  | 0.48584600  |
| C | -3.59494600 | 3.25132500  | -0.77868300 |
| C | -2.89373700 | 2.79110000  | -1.91344700 |
| C | -3.55641800 | 1.85780300  | -2.82340300 |
| C | -2.56163700 | 0.93224000  | -3.31172300 |
| C | -2.89355800 | -0.40907300 | -3.54106100 |
| C | -1.97005300 | -1.44294300 | -3.14643200 |
| C | -2.74116900 | -2.56477900 | -2.62778700 |
| C | -2.26313000 | -3.29489600 | -1.54262300 |
| C | -1.19227200 | -1.77750200 | 2.55308200  |
| C | -5.22237000 | -2.90801900 | 0.63496100  |
| C | -4.53676300 | -2.81432700 | 1.85099300  |
| C | -4.75024000 | -1.66422800 | 2.72041000  |
| C | -5.64855300 | -0.66348800 | 2.34032400  |
| C | -6.35127000 | -0.76048000 | 1.07353300  |
| C | -6.02585200 | -1.67091700 | -1.19374500 |
| C | -5.02454000 | -2.60103400 | -1.68727600 |
| C | -4.52685700 | -3.36651000 | -0.55577200 |
| C | -3.17263300 | -3.70611600 | -0.48685500 |
| C | -2.46002100 | -3.61019500 | 0.77726900  |
| C | -3.13138800 | -3.16315000 | 1.91902000  |
| C | -3.48606200 | -1.32037300 | 3.34498000  |
| C | -3.14867500 | 0.02736500  | 3.54081600  |
| C | -4.08715200 | 1.07095300  | 3.14834600  |
| C | -5.30656700 | 0.73402200  | 2.55941400  |
| C | -5.80310000 | 1.49925900  | 1.42653300  |
| C | -6.45303300 | 0.57387300  | 0.51022100  |
| C | -6.32786700 | 0.76297800  | -0.86873500 |
| C | -6.11603600 | -0.38606500 | -1.74029400 |
| C | -4.14779300 | -2.20983100 | -2.70276900 |
| C | -4.24114900 | -0.87375700 | -3.27127000 |
| C | -5.20334700 | 0.02033300  | -2.79030900 |
| C | -4.85912200 | 1.41907000  | -2.56980600 |
| C | -5.57099600 | 1.88388900  | -1.39433500 |
| C | -4.92699700 | 2.76531100  | -0.51032100 |
| C | -5.06024100 | 2.57031400  | 0.92825900  |
| C | -3.79474400 | 2.92590200  | 1.54662400  |
| C | -3.31768900 | 2.19102700  | 2.63387500  |
| C | -2.48153400 | -2.23494200 | 2.83461400  |
| C | -1.80972500 | 0.50455500  | 3.28405300  |

|    |             |             |             |
|----|-------------|-------------|-------------|
| C  | -6.15559400 | -1.86808100 | 0.23907900  |
| C  | 3.28977800  | 2.09384300  | -3.40480400 |
| C  | 2.09619500  | 1.69024300  | -2.81722300 |
| C  | 4.47580900  | 0.60405100  | -1.97148600 |
| C  | 4.51192700  | 1.55442100  | -2.99034400 |
| C  | 3.48934300  | -0.63885200 | -0.11999300 |
| C  | 0.44618700  | -0.95509800 | -0.51745300 |
| O  | 4.17245600  | -1.74478600 | -0.43418700 |
| O  | 3.16837200  | -0.30084100 | 1.00703100  |
| C  | 5.82027300  | 2.02434300  | -3.57770400 |
| H  | 6.12350300  | 2.96789600  | -3.10480300 |
| H  | 6.61989000  | 1.29525400  | -3.41235300 |
| H  | 5.73785800  | 2.20638500  | -4.65623300 |
| H  | 5.40207900  | 0.14986700  | -1.63054200 |
| H  | 3.26797800  | 2.83732500  | -4.19943700 |
| H  | 1.16728300  | 2.11392000  | -3.18243300 |
| C  | 4.72652600  | -2.57460300 | 0.64331200  |
| C  | 4.26679900  | -4.00163000 | 0.47056600  |
| C  | 5.21525600  | -5.02488900 | 0.33996700  |
| C  | 2.90176900  | -4.32173100 | 0.46728900  |
| C  | 4.79127100  | -6.35088700 | 0.21176800  |
| H  | 6.27729600  | -4.76602100 | 0.34450200  |
| C  | 2.48411500  | -5.64486700 | 0.33061000  |
| H  | 2.16328400  | -3.53113300 | 0.57217600  |
| C  | 3.43122600  | -6.66540300 | 0.20369100  |
| H  | 5.53384000  | -7.14023300 | 0.11164100  |
| H  | 1.42102000  | -5.87531300 | 0.32611900  |
| H  | 3.10719900  | -7.69968600 | 0.09900200  |
| H  | 4.38790500  | -2.15043600 | 1.59130300  |
| H  | 5.81939000  | -2.50082500 | 0.56301400  |
| Br | 8.45760400  | -3.20969700 | 0.49899600  |
| C  | 3.45685600  | 2.91204800  | 2.26918700  |
| C  | 3.57138600  | 2.97529000  | 3.66043100  |
| C  | 3.64731900  | 4.20857700  | 4.30628100  |
| C  | 3.60494800  | 5.38831000  | 3.55611700  |
| C  | 3.48604800  | 5.32907400  | 2.17028600  |
| C  | 3.41112500  | 4.09125300  | 1.51413600  |
| H  | 3.38357700  | 1.94423400  | 1.77860400  |
| H  | 3.60079700  | 2.05236100  | 4.23298800  |
| H  | 3.73881100  | 4.25399100  | 5.38915800  |
| H  | 3.66443700  | 6.35408000  | 4.05327800  |
| H  | 3.47085300  | 6.24360800  | 1.58228000  |
| C  | 3.21734700  | 4.00685300  | 0.03283000  |
| H  | 3.23418800  | 2.98549000  | -0.33637700 |



|    |            |            |             |
|----|------------|------------|-------------|
| H  | 2.31915800 | 4.51418100 | -0.31697000 |
| Br | 4.69009400 | 4.93594500 | -0.98743100 |

**IM18**

-2 1

|   | x           | y           | z           |
|---|-------------|-------------|-------------|
| C | -2.12362200 | -0.91666200 | 1.21349800  |
| C | -1.49036100 | -0.30865900 | 2.34087300  |
| C | -1.22508900 | 1.07246600  | 2.37029000  |
| C | -1.58093700 | 1.92299600  | 1.27077100  |
| C | -1.49770900 | -2.16434700 | 0.98606700  |
| C | -0.50666300 | -2.39338100 | 2.03720600  |
| C | -0.51002100 | -1.22993400 | 2.89272600  |
| C | 0.68864400  | -0.77176400 | 3.46342600  |
| C | 0.01542400  | 1.54270900  | 2.95589700  |
| C | -0.53740600 | 2.86945700  | 1.10371300  |
| C | -0.10526000 | 3.33757100  | -0.16554300 |
| C | -0.68786000 | 2.68535600  | -1.32576300 |
| C | -1.69161000 | 1.72865600  | -1.19153000 |
| C | -1.64703000 | 0.54961000  | -2.00045100 |
| C | -2.13396300 | -0.56825300 | -1.25412200 |
| C | -1.54721500 | -1.81347000 | -1.43593500 |
| C | -1.25999500 | -2.70251200 | -0.31061600 |
| C | 0.68267400  | -3.07093000 | 1.76731400  |
| C | 0.95349400  | -3.57201800 | 0.42633000  |
| C | -0.00933800 | -3.34406100 | -0.58474500 |
| C | 0.45411300  | -2.92682100 | -1.91010400 |
| C | -0.50715000 | -1.98904700 | -2.43923100 |
| C | -0.08740000 | -0.90800700 | -3.22178200 |
| C | -0.68189700 | 0.39032200  | -3.02163700 |
| C | 0.35203000  | 1.38918200  | -3.16334100 |
| C | 0.35233900  | 2.51062200  | -2.33073200 |
| C | 0.45491400  | 2.66392600  | 2.15367800  |
| C | 3.77978800  | 2.14804500  | -0.99940000 |
| C | 3.49453400  | 2.60502100  | 0.30070600  |
| C | 3.82135000  | 1.76253200  | 1.44674600  |
| C | 4.40291500  | 0.50806100  | 1.25288000  |
| C | 4.67850700  | 0.02996700  | -0.09259300 |
| C | 3.76791800  | 0.23650900  | -2.37521800 |
| C | 2.79585300  | 1.17351900  | -2.90553000 |
| C | 2.79540200  | 2.35135400  | -2.04700100 |
| C | 1.58965300  | 3.00309000  | -1.76839900 |
| C | 1.29898000  | 3.49183500  | -0.41985400 |
| C | 2.26303000  | 3.29572500  | 0.59224400  |

|   |             |             |             |
|---|-------------|-------------|-------------|
| C | 2.79242400  | 1.94420900  | 2.45651200  |
| C | 2.36525900  | 0.85045400  | 3.22386700  |
| C | 2.97013700  | -0.45811200 | 3.01929700  |
| C | 3.96631600  | -0.62554800 | 2.05622900  |
| C | 3.96196600  | -1.80072100 | 1.19691300  |
| C | 4.40629800  | -1.39323200 | -0.12773200 |
| C | 3.82974500  | -1.97924200 | -1.26331400 |
| C | 3.50406200  | -1.13856700 | -2.41032100 |
| C | 1.59985800  | 0.70661200  | -3.45956300 |
| C | 1.32567100  | -0.72154000 | -3.49612600 |
| C | 2.26006000  | -1.62274100 | -2.97308100 |
| C | 1.81816000  | -2.75681100 | -2.17014200 |
| C | 2.79955400  | -2.98665100 | -1.12622900 |
| C | 2.35303700  | -3.36881200 | 0.15532800  |
| C | 2.95909700  | -2.76186200 | 1.33578200  |
| C | 1.92736300  | -2.59775900 | 2.34674700  |
| C | 1.92584400  | -1.46126200 | 3.16731400  |
| C | 1.81418200  | 2.86835500  | 1.90998600  |
| C | 0.95931500  | 0.65105000  | 3.49693200  |
| C | 4.37228300  | 0.84075900  | -1.19601000 |
| C | -6.08056400 | -2.05335600 | 0.00506900  |
| C | -4.73060200 | -1.73701900 | 0.05380600  |
| C | -4.29138200 | -0.39896700 | 0.05006900  |
| C | -5.26634300 | 0.60107500  | 0.00369200  |
| C | -6.63387600 | 0.27113900  | -0.03248200 |
| C | -7.06470400 | -1.04856700 | -0.03522600 |
| C | -2.78567400 | -0.11275200 | 0.08411800  |
| C | -4.92118200 | 2.04967500  | 0.01360000  |
| C | -2.42722800 | 1.47126700  | 0.12064000  |
| O | -3.64287900 | 2.39582500  | 0.10104300  |
| O | -5.78435100 | 2.91885400  | -0.03316500 |
| C | -8.53461700 | -1.40122700 | -0.07266000 |
| H | -8.84809200 | -1.93853100 | 0.83353100  |
| H | -9.15466800 | -0.50175900 | -0.15430800 |
| H | -8.77535900 | -2.05080200 | -0.92555800 |
| H | -7.34239800 | 1.09392500  | -0.05755200 |
| H | -6.38218400 | -3.10055700 | 0.00176100  |
| H | -3.99243600 | -2.53082000 | 0.09598500  |

**IM19-1**

-2 1

|   | x           | y          | z           |
|---|-------------|------------|-------------|
| C | -1.15524100 | 0.83144600 | -0.99658800 |
| C | -1.26074500 | 1.84702800 | 0.18044700  |

|   |             |             |             |
|---|-------------|-------------|-------------|
| C | -2.68292000 | 2.41782400  | 0.22309600  |
| C | -3.00255300 | 3.70776400  | -0.21233200 |
| C | -0.93470400 | 1.07791000  | 1.46781800  |
| C | 0.09044300  | 1.48040000  | 2.38333600  |
| C | 1.02896800  | 2.46549800  | 2.03206800  |
| C | 0.99382500  | 3.11201100  | 0.75341300  |
| C | -1.09070200 | -0.31947700 | 1.57811500  |
| C | -0.20574000 | -0.81062300 | 2.63444400  |
| C | 0.52781000  | 0.32455900  | 3.14572400  |
| C | 1.86358600  | 0.17461800  | 3.55220200  |
| C | 2.41102100  | 2.30891800  | 2.45078400  |
| C | 2.33451700  | 3.28332400  | 0.32129000  |
| C | 2.73795500  | 3.15156100  | -1.03362900 |
| C | 1.72759200  | 2.68190500  | -1.96612200 |
| C | 0.41127100  | 2.47329900  | -1.56275900 |
| C | -0.28664100 | 1.31356900  | -2.02368600 |
| C | -1.33628500 | -0.53892400 | -0.84812700 |
| C | -1.38553900 | -1.17384200 | 0.47035700  |
| C | 0.40548300  | -2.05943700 | 2.53604300  |
| C | 0.16254700  | -2.90783000 | 1.37389800  |
| C | -0.69148700 | -2.42726900 | 0.35643400  |
| C | -0.29639900 | -2.62747300 | -1.03818900 |
| C | -0.70429900 | -1.46100300 | -1.78266200 |
| C | 0.08229500  | -0.97869300 | -2.83420500 |
| C | 0.28244600  | 0.44093500  | -2.98017200 |
| C | 1.64464800  | 0.66580500  | -3.40394700 |
| C | 2.35486300  | 1.75969600  | -2.90379900 |
| C | 3.23186000  | 2.81095900  | 1.37107700  |
| C | 5.26501100  | -0.09098800 | -1.58163400 |
| C | 5.46746600  | 0.71789000  | -0.44801000 |
| C | 5.49034800  | 0.10654400  | 0.87634400  |
| C | 5.30096700  | -1.26938300 | 1.01853000  |
| C | 5.07259000  | -2.10032300 | -0.15308600 |
| C | 4.05151800  | -1.94059000 | -2.39157900 |
| C | 3.63251500  | -0.77007900 | -3.13861200 |
| C | 4.37538600  | 0.37594800  | -2.62905000 |
| C | 3.73905100  | 1.61639600  | -2.51539000 |
| C | 3.96000200  | 2.46490100  | -1.34310900 |
| C | 4.83201600  | 2.00783900  | -0.33261000 |
| C | 4.87555700  | 1.02978600  | 1.81646000  |
| C | 4.07449800  | 0.53767100  | 2.85611500  |
| C | 3.87600500  | -0.89708500 | 3.00234000  |
| C | 4.47617800  | -1.78087400 | 2.10416200  |
| C | 3.72992600  | -2.92143800 | 1.59282200  |

|   |             |             |             |
|---|-------------|-------------|-------------|
| C | 4.10431000  | -3.11925700 | 0.20035100  |
| C | 3.13857600  | -3.53523900 | -0.72672400 |
| C | 3.11603100  | -2.92549600 | -2.05114700 |
| C | 2.29697400  | -0.62647200 | -3.52628500 |
| C | 1.32462400  | -1.64897100 | -3.17152000 |
| C | 1.72923200  | -2.77250500 | -2.44247600 |
| C | 0.89959100  | -3.28244700 | -1.35726300 |
| C | 1.77236500  | -3.76937500 | -0.30717200 |
| C | 1.40240700  | -3.55646300 | 1.03664400  |
| C | 2.41166200  | -3.13105800 | 2.00084800  |
| C | 1.78756100  | -2.22144400 | 2.94779700  |
| C | 2.50317300  | -1.11696300 | 3.43226000  |
| C | 4.44329700  | 2.19062300  | 1.05857000  |
| C | 2.83009800  | 1.19330600  | 3.19455100  |
| C | 5.05747200  | -1.51644400 | -1.42815800 |
| C | -5.05540100 | 2.04308000  | 0.64304800  |
| C | -3.73932000 | 1.60253100  | 0.66878800  |
| C | -4.33722200 | 4.15149400  | -0.22495400 |
| C | -5.38090600 | 3.33292300  | 0.18826200  |
| C | -1.95866000 | 4.69276100  | -0.60594400 |
| C | -0.13563000 | 2.95234500  | -0.21988000 |
| O | -0.68122800 | 4.34774300  | -0.46160200 |
| O | -2.24071000 | 5.82162500  | -0.98782300 |
| C | -6.81585500 | 3.80913000  | 0.16579700  |
| H | -6.88946900 | 4.82522900  | -0.23731500 |
| H | -7.44878300 | 3.15761600  | -0.45195300 |
| H | -7.25702700 | 3.81730900  | 1.17213400  |
| H | -4.52029600 | 5.16681400  | -0.56462400 |
| H | -5.83703900 | 1.36625000  | 0.98274800  |
| H | -3.52129800 | 0.61048800  | 1.04858600  |
| C | -4.79484900 | -1.80913700 | -1.62157700 |
| C | -5.36179300 | -1.80823300 | -2.89787300 |
| C | -6.52563900 | -2.53406900 | -3.15217600 |
| C | -7.12590300 | -3.26648700 | -2.12296900 |
| C | -6.56010400 | -3.27006100 | -0.85074000 |
| C | -5.38833300 | -2.54418900 | -0.58713800 |
| H | -3.88471200 | -1.24711700 | -1.42973500 |
| H | -4.88611000 | -1.23836500 | -3.69139800 |
| H | -6.96448000 | -2.53203900 | -4.14741000 |
| H | -8.03358300 | -3.83482600 | -2.31438100 |
| H | -7.03119100 | -3.82845400 | -0.04454400 |
| C | -4.76065300 | -2.57535000 | 0.76868200  |
| H | -4.75497700 | -3.57013700 | 1.21290400  |
| H | -3.75987800 | -2.14028400 | 0.79454400  |

|    |             |             |            |
|----|-------------|-------------|------------|
| Br | -5.82742200 | -1.49150500 | 2.09508800 |
|----|-------------|-------------|------------|

**IM19**

-2 1

|   | x           | y           | z           |
|---|-------------|-------------|-------------|
| C | -0.04970600 | 2.12954500  | 1.20928800  |
| C | -0.77909200 | 2.17393000  | -0.16471700 |
| C | -1.81315200 | 3.30683200  | -0.16978800 |
| C | -3.19456000 | 3.10053500  | -0.22939300 |
| C | 0.28440000  | 2.43480400  | -1.24299100 |
| C | 0.47930700  | 1.58201100  | -2.37296500 |
| C | -0.13658800 | 0.32142100  | -2.45163100 |
| C | -0.98323000 | -0.15920800 | -1.39295900 |
| C | 1.52307000  | 3.05006200  | -0.94704100 |
| C | 2.50209900  | 2.65185000  | -1.95916200 |
| C | 1.84211300  | 1.73579700  | -2.85887200 |
| C | 2.54979700  | 0.65606300  | -3.41001300 |
| C | 0.59729100  | -0.79238200 | -3.01627000 |
| C | -0.72741400 | -1.54470800 | -1.23341100 |
| C | -0.73011500 | -2.19971800 | 0.02895900  |
| C | -0.85337500 | -1.34134600 | 1.19527300  |
| C | -1.07193000 | 0.02881400  | 1.06819000  |
| C | -0.36696000 | 0.93326800  | 1.92449300  |
| C | 1.15738100  | 2.76877500  | 1.45725300  |
| C | 1.97407000  | 3.31943000  | 0.37577600  |
| C | 3.84500900  | 2.47274700  | -1.62583800 |
| C | 4.29749200  | 2.69108800  | -0.25913700 |
| C | 3.34495700  | 3.07530000  | 0.71256600  |
| C | 3.40095600  | 2.44584500  | 2.03386100  |
| C | 2.04551200  | 2.26878500  | 2.49657400  |
| C | 1.69416000  | 1.14175000  | 3.24753300  |
| C | 0.44959500  | 0.46543900  | 2.97832600  |
| C | 0.66779300  | -0.95641400 | 3.11111200  |
| C | 0.03396100  | -1.84141300 | 2.23620400  |
| C | 0.23716300  | -1.96292100 | -2.24478000 |
| C | 3.04981800  | -3.59521600 | 1.02390600  |
| C | 2.61064200  | -3.77254200 | -0.30055200 |
| C | 3.43156400  | -3.28093300 | -1.40274700 |
| C | 4.64009000  | -2.63172000 | -1.14194900 |
| C | 5.08254800  | -2.43367600 | 0.22881100  |
| C | 4.12352900  | -2.08104000 | 2.47278000  |
| C | 2.75962800  | -2.25170300 | 2.93662700  |
| C | 2.09282400  | -3.18111800 | 2.03353300  |
| C | 0.75228100  | -2.97180400 | 1.69246200  |

|   |             |             |             |
|---|-------------|-------------|-------------|
| C | 0.29166300  | -3.17009900 | 0.31893500  |
| C | 1.22594800  | -3.57729900 | -0.65498300 |
| C | 2.54902300  | -2.79177400 | -2.44820900 |
| C | 2.90154400  | -1.65056100 | -3.18426900 |
| C | 4.16111900  | -0.97327700 | -2.91031500 |
| C | 5.01042900  | -1.45252000 | -1.91239500 |
| C | 5.67230300  | -0.52322700 | -1.00851400 |
| C | 5.71921400  | -1.13372100 | 0.31190600  |
| C | 5.55541000  | -0.33434000 | 1.45122300  |
| C | 4.73676900  | -0.82480700 | 2.55406000  |
| C | 2.05942100  | -1.16616400 | 3.47110700  |
| C | 2.69662000  | 0.13894400  | 3.55629600  |
| C | 4.00868800  | 0.30335700  | 3.09860500  |
| C | 4.37480900  | 1.48546600  | 2.32769800  |
| C | 5.34546000  | 1.09238000  | 1.32345500  |
| C | 5.27925100  | 1.68217800  | 0.04550500  |
| C | 5.45603100  | 0.84948700  | -1.13903000 |
| C | 4.58155200  | 1.35323000  | -2.18559700 |
| C | 3.93820700  | 0.45821600  | -3.05036400 |
| C | 1.18757500  | -2.94652300 | -1.96774000 |
| C | 1.91300900  | -0.64208400 | -3.49268600 |
| C | 4.29918400  | -2.91111300 | 1.28981600  |
| C | -2.24526400 | 5.70458900  | -0.09884000 |
| C | -1.35828300 | 4.63810900  | -0.10818000 |
| C | -4.08730100 | 4.18897600  | -0.23436800 |
| C | -3.63581100 | 5.49962900  | -0.16630300 |
| C | -3.78776300 | 1.73990600  | -0.29704800 |
| C | -1.42976700 | 0.69236800  | -0.25263600 |
| O | -2.98052000 | 0.69247200  | -0.30243800 |
| O | -5.00545700 | 1.57095800  | -0.35504800 |
| C | -4.59457400 | 6.66856500  | -0.16626600 |
| H | -5.63461800 | 6.32674500  | -0.19959500 |
| H | -4.47658600 | 7.28964800  | 0.73227200  |
| H | -4.43277100 | 7.32672200  | -1.03115900 |
| H | -5.14795900 | 3.96338400  | -0.29019700 |
| H | -1.85500900 | 6.72027100  | -0.04154200 |
| H | -0.29070200 | 4.82577800  | -0.06742400 |
| C | -7.07023900 | -3.44278000 | -0.64073400 |
| C | -6.36250200 | -4.64140600 | -0.61871000 |
| C | -4.97294700 | -4.63204200 | -0.45119500 |
| C | -4.29777800 | -3.42086900 | -0.30281900 |
| C | -5.00935300 | -2.21715000 | -0.31654800 |
| C | -6.39968700 | -2.21883600 | -0.49035100 |
| H | -8.15251600 | -3.44598000 | -0.75093000 |

|    |             |             |             |
|----|-------------|-------------|-------------|
| H  | -6.89269700 | -5.58519200 | -0.73171100 |
| H  | -4.41951900 | -5.56829600 | -0.43680700 |
| H  | -3.21805100 | -3.39466500 | -0.17729600 |
| H  | -4.47611000 | -1.27591600 | -0.21342300 |
| C  | -7.12288900 | -0.91212000 | -0.58143700 |
| H  | -6.47638000 | -0.05469700 | -0.39475900 |
| H  | -7.66768400 | -0.78783200 | -1.51782200 |
| Br | -8.60238800 | -0.75602700 | 0.79228500  |

**IM20-1**

-2 1

|   | x           | y           | z           |
|---|-------------|-------------|-------------|
| C | -1.22773200 | 0.56866100  | -0.87266900 |
| C | -1.38744300 | 1.63503100  | 0.25421400  |
| C | -2.84771600 | 2.11115300  | 0.32543100  |
| C | -3.28457600 | 3.22790700  | -0.40783300 |
| C | -0.89915100 | 0.93183800  | 1.52401200  |
| C | 0.07761100  | 1.51719200  | 2.43345900  |
| C | 0.90141900  | 2.54905200  | 1.96459300  |
| C | 0.75422900  | 3.14238300  | 0.68374500  |
| C | -0.94663400 | -0.43559300 | 1.73089800  |
| C | 0.02059300  | -0.77774900 | 2.76144300  |
| C | 0.65595600  | 0.45101900  | 3.20475500  |
| C | 2.01417200  | 0.44380800  | 3.56449600  |
| C | 2.32006000  | 2.56489300  | 2.34844800  |
| C | 2.06020100  | 3.41880700  | 0.19165700  |
| C | 2.42347400  | 3.26707800  | -1.16294300 |
| C | 1.43084000  | 2.65342100  | -2.03848400 |
| C | 0.16443300  | 2.32425800  | -1.57053100 |
| C | -0.43728500 | 1.09032400  | -1.95388300 |
| C | -1.30127900 | -0.79669900 | -0.67988300 |
| C | -1.42360400 | -1.46388600 | 0.71131800  |
| C | 0.75179900  | -1.95970200 | 2.71709000  |
| C | 0.56584400  | -2.86871300 | 1.56695200  |
| C | -0.34906100 | -2.56604500 | 0.57682700  |
| C | 0.00964800  | -2.75779400 | -0.79306500 |
| C | -0.56145600 | -1.66795200 | -1.56398600 |
| C | 0.13847200  | -1.18062700 | -2.67133600 |
| C | 0.19299600  | 0.24054300  | -2.88383600 |
| C | 1.50343800  | 0.57863600  | -3.37961500 |
| C | 2.11700600  | 1.76078200  | -2.95030300 |
| C | 3.04489000  | 3.10058900  | 1.22685400  |
| C | 5.24625400  | 0.27745700  | -1.67682500 |
| C | 5.40232100  | 1.14769100  | -0.58727700 |

|   |             |             |             |
|---|-------------|-------------|-------------|
| C | 5.54547300  | 0.60792600  | 0.75660400  |
| C | 5.49613400  | -0.77080700 | 0.96894700  |
| C | 5.31384700  | -1.67425600 | -0.15616800 |
| C | 4.20396300  | -1.72130400 | -2.36232400 |
| C | 3.63979900  | -0.63411900 | -3.13912500 |
| C | 4.27666400  | 0.60220500  | -2.70778000 |
| C | 3.52337600  | 1.77645500  | -2.61993500 |
| C | 3.69953800  | 2.69130100  | -1.49171700 |
| C | 4.65206000  | 2.38210400  | -0.50272800 |
| C | 4.86423400  | 1.50689800  | 1.67518500  |
| C | 4.16203700  | 0.99079900  | 2.76677000  |
| C | 4.10513100  | -0.44762700 | 2.98393400  |
| C | 4.76412800  | -1.30901900 | 2.10603800  |
| C | 4.11793400  | -2.54000200 | 1.67439600  |
| C | 4.46060500  | -2.76361400 | 0.27717700  |
| C | 3.52363300  | -3.31973400 | -0.59990400 |
| C | 3.38789400  | -2.77969800 | -1.94363100 |
| C | 2.28028400  | -0.64313200 | -3.47079500 |
| C | 1.43250500  | -1.73864700 | -3.02885900 |
| C | 1.97828400  | -2.78615300 | -2.28524700 |
| C | 1.24557500  | -3.32001100 | -1.14904500 |
| C | 2.19532400  | -3.64975300 | -0.11453200 |
| C | 1.85842500  | -3.41739700 | 1.22520400  |
| C | 2.83869700  | -2.85187500 | 2.13612200  |
| C | 2.14988700  | -1.96754100 | 3.06624800  |
| C | 2.77541200  | -0.77498900 | 3.47866300  |
| C | 4.30099600  | 2.59303300  | 0.89061500  |
| C | 2.86213000  | 1.53535100  | 3.11459600  |
| C | 5.18429500  | -1.15430800 | -1.44990400 |
| C | -5.18165300 | 1.64148900  | 0.86735600  |
| C | -3.82171100 | 1.36898000  | 1.00068700  |
| C | -4.65498800 | 3.50321300  | -0.53880000 |
| C | -5.62452300 | 2.70331300  | 0.06134000  |
| C | -2.33765600 | 4.24025200  | -0.92272500 |
| C | -0.39048600 | 2.83190800  | -0.24288700 |
| O | -1.05159700 | 4.12176800  | -0.51950900 |
| O | -2.66661600 | 5.22843400  | -1.55460200 |
| C | -7.10273900 | 2.95829400  | -0.11123900 |
| H | -7.30497800 | 3.51107200  | -1.03658100 |
| H | -7.64807000 | 2.00428900  | -0.11854800 |
| H | -7.50161500 | 3.55462900  | 0.72229500  |
| H | -4.93480000 | 4.37542500  | -1.12278900 |
| H | -5.92346800 | 0.98926100  | 1.32785800  |
| H | -3.50859400 | 0.55000300  | 1.63384800  |



|    |             |             |             |
|----|-------------|-------------|-------------|
| C  | -4.92156400 | -2.42233100 | -0.18681300 |
| C  | -5.74444000 | -3.12263300 | -1.07046200 |
| C  | -5.27102700 | -4.27534500 | -1.69699300 |
| C  | -3.97987800 | -4.73207400 | -1.41463500 |
| C  | -3.16713500 | -4.03896900 | -0.51643800 |
| C  | -3.62161100 | -2.86166000 | 0.10094600  |
| H  | -5.35061000 | -1.54750700 | 0.29732900  |
| H  | -6.75349100 | -2.74458100 | -1.21729800 |
| H  | -5.90457300 | -4.82586700 | -2.39038900 |
| H  | -3.60475000 | -5.63869700 | -1.88665900 |
| H  | -2.17645000 | -4.42230100 | -0.28926900 |
| C  | -2.80623000 | -2.10151200 | 1.13164300  |
| H  | -2.57579600 | -2.75603400 | 1.98337600  |
| H  | -3.44008500 | -1.30918300 | 1.52787700  |
| Br | -8.10517400 | -0.63996400 | 0.63545100  |

## IM20

-2 1

|   | x           | y           | z           |
|---|-------------|-------------|-------------|
| C | -0.33009900 | 2.56898300  | 0.85439700  |
| C | -1.51728800 | 1.68896700  | 0.35231600  |
| C | -2.88240800 | 2.39302800  | 0.25384700  |
| C | -3.98314800 | 2.00297000  | 1.03301600  |
| C | -1.13704400 | 1.23727000  | -1.05420400 |
| C | -1.11395000 | -0.12955600 | -1.48122600 |
| C | -1.20816300 | -1.19843500 | -0.60723800 |
| C | -1.57274100 | -1.05576600 | 0.87677000  |
| C | -0.26224600 | 1.95930800  | -1.88026300 |
| C | 0.27593000  | 1.06152200  | -2.90997700 |
| C | -0.27345800 | -0.24331400 | -2.66952000 |
| C | 0.49104800  | -1.38845400 | -2.90424900 |
| C | -0.38007900 | -2.33881800 | -0.82127900 |
| C | -0.45890300 | -1.94723300 | 1.48470900  |
| C | 0.34873900  | -1.59028000 | 2.54855300  |
| C | 0.39262200  | -0.18518500 | 2.99419500  |
| C | -0.33378400 | 0.76626200  | 2.32267600  |
| C | 0.20394500  | 2.06309500  | 2.07872400  |
| C | 0.53043300  | 3.27430100  | 0.01479600  |
| C | 0.54343700  | 3.04378800  | -1.42632800 |
| C | 1.57627200  | 1.20790800  | -3.38246200 |
| C | 2.42858300  | 2.26397600  | -2.85900800 |
| C | 1.90056900  | 3.12684900  | -1.86718400 |
| C | 2.74505000  | 3.48047000  | -0.72570600 |
| C | 1.89221400  | 3.56914300  | 0.43758600  |

|   |             |             |             |
|---|-------------|-------------|-------------|
| C | 2.36528700  | 3.15803100  | 1.68871600  |
| C | 1.49596700  | 2.39190300  | 2.54252800  |
| C | 2.28117500  | 1.38388600  | 3.21278700  |
| C | 1.73691300  | 0.11464200  | 3.43311900  |
| C | 0.09829900  | -2.79909100 | 0.47198400  |
| C | 4.39337500  | -1.85584500 | 1.79412500  |
| C | 3.57624400  | -2.86695700 | 1.27098100  |
| C | 3.59547100  | -3.13837500 | -0.15972000 |
| C | 4.44038100  | -2.40457900 | -0.99813000 |
| C | 5.28534000  | -1.36054500 | -0.44756800 |
| C | 5.29074400  | 0.27916000  | 1.39651200  |
| C | 4.43318400  | 0.37217900  | 2.56169500  |
| C | 3.86924800  | -0.94854900 | 2.80318200  |
| C | 2.54363900  | -1.07104800 | 3.22388500  |
| C | 1.68779600  | -2.11724500 | 2.68475700  |
| C | 2.20401500  | -2.99556700 | 1.72187300  |
| C | 2.24338900  | -3.45996000 | -0.58018500 |
| C | 1.77711200  | -3.01247500 | -1.82090900 |
| C | 2.65808100  | -2.25793800 | -2.70179400 |
| C | 3.95990500  | -1.95581700 | -2.29683500 |
| C | 4.51096600  | -0.63375700 | -2.54295700 |
| C | 5.33809300  | -0.27000000 | -1.40136200 |
| C | 5.35039700  | 1.05608700  | -0.95305400 |
| C | 5.33585800  | 1.33427000  | 0.47771000  |
| C | 3.65571900  | 1.51648800  | 2.76877600  |
| C | 3.70691100  | 2.61673800  | 1.81732700  |
| C | 4.52558600  | 2.51690500  | 0.68892600  |
| C | 4.04061200  | 2.96607600  | -0.61049400 |
| C | 4.57215200  | 2.07642400  | -1.62580800 |
| C | 3.75041100  | 1.72061400  | -2.71129700 |
| C | 3.73703300  | 0.33624000  | -3.18274300 |
| C | 2.38803000  | 0.02227200  | -3.60793000 |
| C | 1.85562900  | -1.25080900 | -3.37541500 |
| C | 1.38436200  | -3.35025500 | 0.58761200  |
| C | 0.44160500  | -2.47538900 | -1.95922800 |
| C | 5.27559900  | -1.09996000 | 0.93094800  |
| C | -4.39925000 | 3.79749300  | -1.02340700 |
| C | -3.10984200 | 3.34213800  | -0.74876300 |
| C | -5.28230800 | 2.41888400  | 0.71525200  |
| C | -5.51528400 | 3.30099400  | -0.33935000 |
| C | -3.80949600 | 1.18368700  | 2.24223800  |
| C | -1.53614000 | 0.47344100  | 1.43955800  |
| O | -2.59369300 | 0.59797900  | 2.43312700  |
| O | -4.63718400 | 1.04936200  | 3.11957700  |

|    |             |             |             |
|----|-------------|-------------|-------------|
| C  | -6.92748500 | 3.61171900  | -0.76207000 |
| H  | -7.52337900 | 4.01970000  | 0.06530600  |
| H  | -6.95490800 | 4.33025400  | -1.59034800 |
| H  | -7.39389700 | 2.66499600  | -1.07601500 |
| H  | -6.10813700 | 1.99625800  | 1.27498800  |
| H  | -4.54540100 | 4.50910900  | -1.83492700 |
| H  | -2.28201700 | 3.68570900  | -1.36047900 |
| C  | -4.38119900 | -3.00654200 | -0.47686500 |
| C  | -4.78233000 | -4.22596900 | -1.02700000 |
| C  | -4.20708600 | -5.42265400 | -0.59716300 |
| C  | -3.23947900 | -5.39547400 | 0.40964700  |
| C  | -2.84279500 | -4.17873600 | 0.96607100  |
| C  | -3.39015300 | -2.96651900 | 0.51739700  |
| H  | -4.89254500 | -2.09150500 | -0.78083600 |
| H  | -5.56174600 | -4.22977100 | -1.78515000 |
| H  | -4.52027600 | -6.37132700 | -1.02989400 |
| H  | -2.79585100 | -6.32239400 | 0.76879100  |
| H  | -2.10219800 | -4.17159000 | 1.76121000  |
| C  | -3.02572500 | -1.63166400 | 1.13957600  |
| H  | -3.16796100 | -1.67804700 | 2.22278400  |
| H  | -3.74426900 | -0.90058800 | 0.75712300  |
| Br | -7.08426500 | -0.15530400 | -0.88956100 |

**IM21-1**

-2 1

|   | x           | y           | z           |
|---|-------------|-------------|-------------|
| C | -0.66090700 | 1.17416000  | -0.86620500 |
| C | 0.34307300  | 1.43585300  | 0.29902200  |
| C | 0.69493300  | 2.93156700  | 0.36657700  |
| C | 1.79735400  | 3.45295600  | -0.33412700 |
| C | -0.36747600 | 0.90620000  | 1.54823200  |
| C | 0.26015000  | -0.00868200 | 2.49492900  |
| C | 1.37412200  | -0.74811200 | 2.08199100  |
| C | 2.00907600  | -0.56509300 | 0.82239900  |
| C | -1.74038700 | 0.84078700  | 1.70061000  |
| C | -2.04198600 | -0.13969200 | 2.73305400  |
| C | -0.78449400 | -0.66424700 | 3.23367900  |
| C | -0.69232300 | -2.01321300 | 3.61479000  |
| C | 1.49279000  | -2.15442500 | 2.48687800  |
| C | 2.40859100  | -1.85263400 | 0.36031200  |
| C | 2.34278800  | -2.24359100 | -0.99336000 |
| C | 1.68225900  | -1.31683600 | -1.90648900 |
| C | 1.23075500  | -0.07630500 | -1.47211500 |
| C | -0.03294500 | 0.41524200  | -1.91269700 |

|   |             |             |             |
|---|-------------|-------------|-------------|
| C | -2.03411000 | 1.13413200  | -0.72700000 |
| C | -2.76373700 | 1.21695700  | 0.63498400  |
| C | -3.15614000 | -0.96726500 | 2.65409300  |
| C | -4.03097800 | -0.87258200 | 1.46749000  |
| C | -3.76584300 | 0.05183400  | 0.47569100  |
| C | -3.87243400 | -0.33918100 | -0.89457100 |
| C | -2.80416000 | 0.31160300  | -1.63141700 |
| C | -2.21675300 | -0.35867000 | -2.70784200 |
| C | -0.78898000 | -0.29656900 | -2.86381300 |
| C | -0.32359000 | -1.58026400 | -3.32501300 |
| C | 0.88732400  | -2.08686400 | -2.84122200 |
| C | 2.13104400  | -2.84606200 | 1.39847000  |
| C | -0.38008800 | -5.31207700 | -1.57647900 |
| C | 0.45579000  | -5.38230000 | -0.45228200 |
| C | -0.12332900 | -5.55317100 | 0.87150700  |
| C | -1.50871900 | -5.61711200 | 1.02933100  |
| C | -2.37811500 | -5.52501700 | -0.13247500 |
| C | -2.42962900 | -4.45080500 | -2.35605100 |
| C | -1.36269000 | -3.80716100 | -3.09847400 |
| C | -0.09598000 | -4.33257500 | -2.60978100 |
| C | 1.00705000  | -3.48261100 | -2.48791400 |
| C | 1.88715800  | -3.56803600 | -1.32330000 |
| C | 1.61927400  | -4.52941000 | -0.33208500 |
| C | 0.67797600  | -4.78702400 | 1.81297700  |
| C | 0.06216300  | -4.11721800 | 2.87265500  |
| C | -1.38327000 | -4.17864700 | 3.03318200  |
| C | -2.15078100 | -4.91768500 | 2.13283800  |
| C | -3.41338500 | -4.38352900 | 1.64411600  |
| C | -3.55168400 | -4.76128000 | 0.24476900  |
| C | -4.14738600 | -3.88448200 | -0.66737900 |
| C | -3.56829600 | -3.72155300 | -1.99198900 |
| C | -1.47184800 | -2.45777100 | -3.45165900 |
| C | -2.65063300 | -1.69924200 | -3.06618900 |
| C | -3.67834500 | -2.32175700 | -2.35591200 |
| C | -4.31536100 | -1.62200600 | -1.25236300 |
| C | -4.60601000 | -2.58260000 | -0.21628300 |
| C | -4.45689600 | -2.21058200 | 1.12594400  |
| C | -3.84905000 | -3.12900700 | 2.07337700  |
| C | -3.06162600 | -2.35709300 | 3.02505300  |
| C | -1.83959500 | -2.87513200 | 3.49382600  |
| C | 1.74361000  | -4.14413100 | 1.06248700  |
| C | 0.48201400  | -2.77220200 | 3.22126400  |
| C | -1.82003500 | -5.36899200 | -1.40721200 |
| C | 0.02042800  | 5.22520800  | 0.86289700  |

|    |             |             |             |
|----|-------------|-------------|-------------|
| C  | -0.14584800 | 3.84862800  | 1.00445000  |
| C  | 1.96513200  | 4.84008800  | -0.47422300 |
| C  | 1.06879500  | 5.74641800  | 0.08640900  |
| C  | 2.90413100  | 2.58958400  | -0.78773400 |
| C  | 1.63398700  | 0.53321000  | -0.13443800 |
| O  | 2.87814300  | 1.30304500  | -0.37561900 |
| O  | 3.89359800  | 2.99358300  | -1.37971100 |
| C  | 1.20967600  | 7.23841800  | -0.09496600 |
| H  | 1.78215700  | 7.47623300  | -0.99945500 |
| H  | 0.21549600  | 7.70347900  | -0.14724800 |
| H  | 1.73626200  | 7.69173200  | 0.75723500  |
| H  | 2.83272600  | 5.18548900  | -1.02898200 |
| H  | -0.70505500 | 5.91567800  | 1.29287500  |
| H  | -0.95729100 | 3.47823600  | 1.61645500  |
| C  | -3.96388100 | 4.61788100  | -0.34943700 |
| C  | -4.68136800 | 5.37127500  | -1.27998000 |
| C  | -5.75085300 | 4.79533300  | -1.96535500 |
| C  | -6.10908900 | 3.47102800  | -1.69494400 |
| C  | -5.40052600 | 2.72701800  | -0.75034800 |
| C  | -4.30389600 | 3.28615300  | -0.07315000 |
| H  | -3.15817200 | 5.12431800  | 0.17823400  |
| H  | -4.38362300 | 6.40811700  | -1.41738200 |
| H  | -6.31342000 | 5.37397500  | -2.69597100 |
| H  | -6.95089700 | 3.01518100  | -2.21351700 |
| H  | -5.70935000 | 1.70799500  | -0.53565200 |
| C  | -3.53113700 | 2.54737200  | 1.00503000  |
| H  | -4.20393100 | 2.27431600  | 1.82941900  |
| H  | -2.81121500 | 3.24795700  | 1.42644800  |
| Br | -2.47727800 | 7.92198700  | 0.52580500  |
| C  | 7.73196300  | 1.46183300  | 0.80020700  |
| C  | 8.11969200  | 1.71890000  | 2.11375400  |
| C  | 7.31744100  | 1.30079300  | 3.17888100  |
| C  | 6.12623500  | 0.62413100  | 2.91712800  |
| C  | 5.74017000  | 0.36004300  | 1.60134300  |
| C  | 6.53845700  | 0.77894600  | 0.52854200  |
| H  | 8.36284100  | 1.77289900  | -0.02761100 |
| H  | 9.05021800  | 2.24850300  | 2.30663500  |
| H  | 7.61915100  | 1.50335100  | 4.20408000  |
| H  | 5.48940600  | 0.29793100  | 3.73548400  |
| H  | 4.79983100  | -0.14738500 | 1.40433300  |
| C  | 6.04073500  | 0.55451000  | -0.87104200 |
| H  | 5.28227900  | -0.22365100 | -0.91999000 |
| H  | 5.64798000  | 1.46039800  | -1.33385100 |
| Br | 7.48880400  | -0.06602000 | -2.11734900 |

**IM21**

-2 1

|   | x           | y           | z           |
|---|-------------|-------------|-------------|
| C | 0.53670800  | 0.49296300  | -2.17277800 |
| C | 1.27925600  | -0.59580800 | -1.33568500 |
| C | 2.77442000  | -0.78438000 | -1.64867900 |
| C | 3.28318500  | -1.98188200 | -2.17617300 |
| C | 1.17002900  | -0.14753100 | 0.11758100  |
| C | 0.65627300  | -0.96529000 | 1.17725700  |
| C | -0.01318600 | -2.15563900 | 0.95629400  |
| C | -0.08563000 | -2.85287100 | -0.40961900 |
| C | 1.01673500  | 1.19212000  | 0.49696400  |
| C | 0.46357600  | 1.24550500  | 1.85668700  |
| C | 0.25620300  | -0.10852300 | 2.28844700  |
| C | -0.83894500 | -0.43561000 | 3.09175400  |
| C | -1.16488700 | -2.45380800 | 1.74341300  |
| C | -1.60809000 | -3.14512200 | -0.44808900 |
| C | -2.43963100 | -2.87634200 | -1.51911600 |
| C | -1.96791200 | -2.00262600 | -2.60933800 |
| C | -0.72440100 | -1.42729000 | -2.53182900 |
| C | -0.50855000 | -0.08473200 | -2.95711300 |
| C | 0.38866800  | 1.82066900  | -1.77540300 |
| C | 0.70711400  | 2.24690400  | -0.41513000 |
| C | -0.41814800 | 2.25384200  | 2.23396900  |
| C | -0.80624800 | 3.28172800  | 1.27902600  |
| C | -0.26704900 | 3.22319900  | -0.02961800 |
| C | -1.15334700 | 3.47825100  | -1.16471300 |
| C | -0.74512200 | 2.60567000  | -2.24145000 |
| C | -1.70311600 | 2.05410600  | -3.09935500 |
| C | -1.57987100 | 0.67155500  | -3.47905700 |
| C | -2.89869600 | 0.08798800  | -3.52425200 |
| C | -3.08852100 | -1.22890800 | -3.09382700 |
| C | -2.16196200 | -3.05572300 | 0.87404300  |
| C | -5.72510900 | -0.56056200 | -0.59883900 |
| C | -5.34474000 | -1.53374200 | 0.33447900  |
| C | -5.05891900 | -1.14148200 | 1.70664200  |
| C | -5.18165800 | 0.19730800  | 2.09052700  |
| C | -5.57710100 | 1.20007000  | 1.11781400  |
| C | -5.38296800 | 1.65571900  | -1.30016700 |
| C | -4.96957900 | 0.78299400  | -2.38155100 |
| C | -5.17327000 | -0.59107400 | -1.94458700 |
| C | -4.24404300 | -1.57427400 | -2.29022200 |
| C | -3.84315500 | -2.58826400 | -1.32623000 |

|   |             |             |             |
|---|-------------|-------------|-------------|
| C | -4.38889200 | -2.55982700 | -0.03587200 |
| C | -3.94653200 | -1.94307100 | 2.18619300  |
| C | -2.98228700 | -1.36571400 | 3.01763400  |
| C | -3.11200200 | 0.02593200  | 3.42758000  |
| C | -4.18551700 | 0.79257200  | 2.96961000  |
| C | -3.96929500 | 2.16225000  | 2.53463400  |
| C | -4.83705900 | 2.41593900  | 1.39387500  |
| C | -4.37573500 | 3.21275500  | 0.33955700  |
| C | -4.66382700 | 2.82735100  | -1.03619600 |
| C | -3.85658500 | 1.11436500  | -3.16135700 |
| C | -3.11270800 | 2.33624300  | -2.89242300 |
| C | -3.50778600 | 3.16763600  | -1.84102400 |
| C | -2.50790800 | 3.76061900  | -0.96161800 |
| C | -3.05600900 | 3.80956700  | 0.38074000  |
| C | -2.20643200 | 3.54381400  | 1.46994000  |
| C | -2.68616200 | 2.71136500  | 2.57238700  |
| C | -1.57296300 | 1.91893800  | 3.05270100  |
| C | -1.77816600 | 0.60044000  | 3.47462100  |
| C | -3.52564300 | -2.80586900 | 1.09430000  |
| C | -1.57586800 | -1.64369500 | 2.82124100  |
| C | -5.86027400 | 0.82526000  | -0.20395200 |
| C | 5.07004300  | -0.06844400 | -1.29719200 |
| C | 3.69961900  | 0.18810200  | -1.25479900 |
| C | 4.65639400  | -2.25654300 | -2.16144000 |
| C | 5.57167000  | -1.31307400 | -1.69501600 |
| C | 2.40014700  | -2.97652400 | -2.80386700 |
| C | 0.41388100  | -1.93868500 | -1.66404400 |
| O | 1.05691900  | -2.82575600 | -2.62199500 |
| O | 2.76586800  | -3.87732600 | -3.52956500 |
| C | 7.02387600  | -1.68467900 | -1.54507200 |
| H | 7.45984800  | -2.02874600 | -2.49248500 |
| H | 7.62293300  | -0.84230800 | -1.17852900 |
| H | 7.07877300  | -2.51844500 | -0.82860100 |
| H | 4.98662500  | -3.24158800 | -2.46855900 |
| H | 5.76068300  | 0.69764000  | -0.94770700 |
| H | 3.34764500  | 1.13247800  | -0.85302800 |
| C | 1.79165500  | -5.29048400 | 1.62083600  |
| C | 1.73926800  | -6.19022100 | 2.68777800  |
| C | 0.57825400  | -6.92066000 | 2.94510300  |
| C | -0.52966500 | -6.76360100 | 2.10938500  |
| C | -0.47702300 | -5.87092000 | 1.03808200  |
| C | 0.67378100  | -5.10602300 | 0.79085500  |
| H | 2.73202500  | -4.78245300 | 1.39804400  |
| H | 2.62371600  | -6.32478200 | 3.30583100  |

|    |             |             |             |
|----|-------------|-------------|-------------|
| H  | 0.54021200  | -7.61969100 | 3.77886900  |
| H  | -1.43521700 | -7.34155400 | 2.28511700  |
| H  | -1.33851700 | -5.77229600 | 0.38324200  |
| C  | 0.78929300  | -4.17385300 | -0.40067500 |
| H  | 0.56105000  | -4.72101500 | -1.31952900 |
| H  | 1.83940900  | -3.87395000 | -0.46452100 |
| Br | 5.42477800  | -4.50992900 | 0.39190100  |
| C  | 3.32230900  | 3.93975500  | 2.02056000  |
| C  | 3.88534600  | 3.54045500  | 3.23384900  |
| C  | 5.25119400  | 3.70735000  | 3.46113900  |
| C  | 6.05683400  | 4.27537500  | 2.46917400  |
| C  | 5.49666200  | 4.66729600  | 1.25649700  |
| C  | 4.12411600  | 4.50033200  | 1.01848000  |
| H  | 2.26042500  | 3.79820600  | 1.84419700  |
| H  | 3.25340700  | 3.08522500  | 3.99114700  |
| H  | 5.69083700  | 3.38671600  | 4.40228400  |
| H  | 7.12344300  | 4.40129600  | 2.63892300  |
| H  | 6.12046800  | 5.11104600  | 0.48388200  |
| C  | 3.52782100  | 4.86633600  | -0.30047700 |
| H  | 4.13642700  | 4.55327300  | -1.14761600 |
| H  | 2.50522700  | 4.51162500  | -0.41837700 |
| Br | 3.41097800  | 6.86965300  | -0.54398400 |

### IM9

-2 1

|   | x           | y           | z           |
|---|-------------|-------------|-------------|
| C | -1.45564300 | 0.80614500  | -0.18131900 |
| C | -1.17758500 | -0.25777100 | 0.88488700  |
| C | -0.55038100 | 0.00838100  | 2.08864200  |
| C | 0.11858200  | 1.28532100  | 2.31823400  |
| C | -1.00551000 | 0.06668200  | -1.44438900 |
| C | -0.91337400 | -1.33830100 | -1.16750200 |
| C | -1.02214900 | -1.53385200 | 0.25873700  |
| C | -0.28284100 | -2.56623100 | 0.89080200  |
| C | 0.25457200  | -1.02469600 | 2.73692000  |
| C | 1.32332200  | 1.00371900  | 3.09620600  |
| C | 2.49805200  | 1.73476000  | 2.84856600  |
| C | 2.52016600  | 2.74274700  | 1.83207000  |
| C | 1.35237100  | 2.96352200  | 1.05416700  |
| C | 1.45943500  | 3.15783900  | -0.37027600 |
| C | 0.30851500  | 2.57975500  | -1.00389600 |
| C | 0.44903900  | 1.91823200  | -2.20448700 |
| C | -0.22597700 | 0.63079400  | -2.42874500 |
| C | -0.07130900 | -2.16442900 | -1.93840100 |



|   |             |             |             |
|---|-------------|-------------|-------------|
| C | 0.74319600  | -1.58021500 | -2.96191300 |
| C | 0.68079200  | -0.19826900 | -3.21318100 |
| C | 1.87715800  | 0.55149100  | -3.49144600 |
| C | 1.75143800  | 1.83442400  | -2.85386600 |
| C | 2.86697600  | 2.44688700  | -2.25113400 |
| C | 2.72241500  | 3.12893000  | -1.00428000 |
| C | 3.92030400  | 2.85170400  | -0.20870500 |
| C | 3.81253800  | 2.66099900  | 1.16891700  |
| C | 1.38278900  | -0.40501300 | 3.38267100  |
| C | 5.53527300  | -0.59775900 | 1.32865100  |
| C | 4.74547500  | -1.16313200 | 2.33322200  |
| C | 4.07550900  | -2.43040100 | 2.10866900  |
| C | 4.21728200  | -3.09264700 | 0.88648600  |
| C | 5.03670200  | -2.50457700 | -0.16045200 |
| C | 5.70495300  | -0.27192000 | -0.98883200 |
| C | 5.59216800  | 1.02795300  | -0.36132900 |
| C | 5.48184900  | 0.83053200  | 1.06081500  |
| C | 4.61066500  | 1.63582700  | 1.82729700  |
| C | 3.79151900  | 1.05212000  | 2.85988700  |
| C | 3.84701400  | -0.32775000 | 3.12458000  |
| C | 2.77339400  | -2.36117700 | 2.76509000  |
| C | 1.66662600  | -2.97376100 | 2.14676100  |
| C | 1.81431500  | -3.66166900 | 0.88935200  |
| C | 3.07381900  | -3.73023300 | 0.25233000  |
| C | 3.18078800  | -3.53854800 | -1.16996400 |
| C | 4.38263600  | -2.77333000 | -1.43197300 |
| C | 4.40662700  | -1.79609300 | -2.43635500 |
| C | 5.07412400  | -0.53426500 | -2.21350500 |
| C | 4.82036600  | 2.03577100  | -0.99630300 |
| C | 4.16037500  | 1.76245600  | -2.25113300 |
| C | 4.27663900  | 0.50529900  | -2.86389000 |
| C | 3.14161600  | -0.11411900 | -3.50354200 |
| C | 3.20384900  | -1.52584400 | -3.22431400 |
| C | 2.03609700  | -2.26223500 | -2.96284600 |
| C | 2.01580900  | -3.27702100 | -1.93754600 |
| C | 0.72745200  | -3.19908900 | -1.27977800 |
| C | 0.62225200  | -3.38639000 | 0.09838600  |
| C | 2.64600900  | -1.07490200 | 3.39829600  |
| C | 0.37638800  | -2.28798000 | 2.13641300  |
| C | 5.68099000  | -1.28400500 | 0.05572500  |
| C | -2.19823700 | 5.76972600  | 0.50182600  |
| C | -1.31922400 | 4.70856900  | 0.33956100  |
| C | -1.77930300 | 3.38674900  | 0.18436700  |
| C | -3.16460200 | 3.19694600  | 0.18610800  |

|    |             |             |             |
|----|-------------|-------------|-------------|
| C  | -4.05117200 | 4.27598300  | 0.35885000  |
| C  | -3.59046000 | 5.57418100  | 0.52324600  |
| C  | -0.76271400 | 2.23094800  | 0.06551900  |
| C  | -3.76569000 | 1.86534100  | -0.03753500 |
| C  | 0.14432600  | 2.25380800  | 1.33012200  |
| O  | -2.95462400 | 0.84607500  | -0.30111800 |
| O  | -4.97754600 | 1.67789900  | -0.03119800 |
| C  | -4.53830500 | 6.73534600  | 0.71576800  |
| H  | -5.58183200 | 6.40847000  | 0.65673500  |
| H  | -4.39507900 | 7.21633300  | 1.69303000  |
| H  | -4.38749900 | 7.51158000  | -0.04643900 |
| H  | -5.11387200 | 4.05399000  | 0.35139500  |
| H  | -1.79566500 | 6.77526800  | 0.61700800  |
| H  | -0.25278700 | 4.89813600  | 0.33920700  |
| C  | -7.08483000 | -0.80263200 | 0.26510600  |
| H  | -7.74575600 | -0.43353200 | 1.04945500  |
| H  | -6.41394600 | -0.01356100 | -0.07129000 |
| C  | -6.37126200 | -2.05993300 | 0.64373500  |
| C  | -7.06870100 | -3.16184600 | 1.16335200  |
| C  | -4.97530200 | -2.12231100 | 0.53970200  |
| C  | -6.38312900 | -4.30200600 | 1.57263100  |
| H  | -8.15423600 | -3.12246700 | 1.22599700  |
| C  | -4.28585800 | -3.26381100 | 0.95924100  |
| H  | -4.42127800 | -1.27351200 | 0.14816700  |
| C  | -4.98823300 | -4.35350900 | 1.47335000  |
| H  | -6.93407100 | -5.15133800 | 1.97169800  |
| H  | -3.20179000 | -3.28658400 | 0.88720600  |
| H  | -4.45090100 | -5.24136000 | 1.79817600  |
| Br | -8.36944500 | -1.08658700 | -1.27532500 |

**P4'**

-2 1

|   | x           | y           | z           |
|---|-------------|-------------|-------------|
| C | 1.23421300  | -0.61212200 | -0.79617400 |
| C | 1.02234800  | 0.91982300  | -0.59163100 |
| C | 2.22423800  | 1.82907000  | -1.01219800 |
| C | 3.59399800  | 1.61406700  | -0.70288600 |
| C | -0.21862900 | 1.30084600  | -1.38617600 |
| C | -1.24963100 | 2.06172100  | -0.92740100 |
| C | -1.36449300 | 2.57377500  | 0.49399000  |
| C | -0.48434400 | 1.66435700  | 1.38004300  |
| C | -0.65496700 | 0.57704800  | -2.57779400 |
| C | -2.03005900 | 0.93256500  | -2.83722900 |
| C | -2.41836700 | 1.88534200  | -1.81049200 |

|   |             |             |             |
|---|-------------|-------------|-------------|
| C | -3.69219700 | 1.80660400  | -1.26151200 |
| C | -2.77286300 | 2.20965500  | 1.02516700  |
| C | -1.26753400 | 1.16238800  | 2.47947800  |
| C | -0.93733600 | -0.03432100 | 3.12471000  |
| C | 0.16164300  | -0.81189400 | 2.61832800  |
| C | 0.86369100  | -0.34801800 | 1.50250800  |
| C | 1.26503500  | -1.28319100 | 0.46903000  |
| C | 0.76200200  | -1.30816800 | -1.89967900 |
| C | -0.17479700 | -0.68818700 | -2.85918900 |
| C | -2.92057600 | -0.03838100 | -3.29293300 |
| C | -2.44838000 | -1.38797700 | -3.53559400 |
| C | -1.09798400 | -1.70319000 | -3.31540400 |
| C | -0.74682900 | -2.94967200 | -2.65835700 |
| C | 0.39679400  | -2.70272300 | -1.79404600 |
| C | 0.50339300  | -3.37241400 | -0.56973800 |
| C | 0.95138100  | -2.64466200 | 0.58975700  |
| C | 0.19752800  | -3.11645500 | 1.73967700  |
| C | -0.18817900 | -2.21732800 | 2.73289200  |
| C | -2.66501500 | 1.49951300  | 2.26219100  |
| C | -3.80635300 | -2.94586300 | 2.65516500  |
| C | -4.25273100 | -1.64201200 | 2.89009100  |
| C | -5.17859400 | -1.01145800 | 1.96055000  |
| C | -5.61785300 | -1.70851200 | 0.83295900  |
| C | -5.15291500 | -3.06142300 | 0.58771500  |
| C | -3.15425000 | -4.45620000 | 0.97625200  |
| C | -2.00785700 | -4.21857000 | 1.83605600  |
| C | -2.41105600 | -3.28640700 | 2.87430100  |
| C | -1.51716200 | -2.30314000 | 3.31242600  |
| C | -1.98213000 | -0.94888000 | 3.55606800  |
| C | -3.32347500 | -0.62465500 | 3.34635700  |
| C | -4.81627300 | 0.39109300  | 1.85436200  |
| C | -4.89338600 | 1.03578500  | 0.61308500  |
| C | -5.36018500 | 0.31388600  | -0.55628800 |
| C | -5.72071300 | -1.03232100 | -0.45190700 |
| C | -5.33293400 | -1.96898600 | -1.49019800 |
| C | -4.97119600 | -3.21988900 | -0.84563000 |
| C | -3.90257700 | -3.97844300 | -1.33191700 |
| C | -2.97486600 | -4.60099100 | -0.40407300 |
| C | -0.72578800 | -4.13667200 | 1.28354300  |
| C | -0.53985200 | -4.29236400 | -0.15165700 |
| C | -1.64259000 | -4.51957800 | -0.97690200 |
| C | -1.74653100 | -3.84016600 | -2.25876700 |
| C | -3.14438600 | -3.51008200 | -2.48153500 |
| C | -3.48390100 | -2.30438100 | -3.10012500 |

|    |             |             |             |
|----|-------------|-------------|-------------|
| C  | -4.60167800 | -1.51370100 | -2.59418200 |
| C  | -4.25736500 | -0.11536800 | -2.72491300 |
| C  | -4.61075100 | 0.78651300  | -1.70867400 |
| C  | -3.67796400 | 0.63032300  | 2.70470900  |
| C  | -3.85162700 | 1.94758400  | 0.19454800  |
| C  | -4.26508600 | -3.66983100 | 1.48166000  |
| C  | 2.91889900  | 3.77550100  | -2.33590000 |
| C  | 1.93063000  | 2.92501000  | -1.84241700 |
| C  | 4.57460500  | 2.46540100  | -1.23821400 |
| C  | 4.26538300  | 3.55938000  | -2.04759500 |
| C  | 4.11744500  | 0.58894700  | 0.26426500  |
| C  | 0.58368700  | 0.92875900  | 0.90529000  |
| O  | 5.31522200  | 0.12506100  | -0.12025000 |
| O  | 3.55702300  | 0.27806800  | 1.30188500  |
| C  | 5.34949300  | 4.47591800  | -2.56422800 |
| H  | 5.53765800  | 5.30317800  | -1.86603400 |
| H  | 6.29637000  | 3.94120700  | -2.69349500 |
| H  | 5.07067500  | 4.92003700  | -3.52663100 |
| H  | 5.61136400  | 2.25599200  | -0.99687300 |
| H  | 2.61607200  | 4.60835600  | -2.96705700 |
| H  | 0.90828000  | 3.14120100  | -2.13811200 |
| C  | 6.10752600  | -0.66804600 | 0.82640300  |
| C  | 6.18773900  | -2.10680000 | 0.37515900  |
| C  | 7.43443300  | -2.66759200 | 0.06668400  |
| C  | 5.03306400  | -2.89704700 | 0.28048400  |
| C  | 7.51386200  | -4.00479400 | -0.33303100 |
| H  | 8.32993500  | -2.04727200 | 0.15709200  |
| C  | 5.11702300  | -4.22746200 | -0.12815000 |
| H  | 4.06678600  | -2.46727900 | 0.53191100  |
| C  | 6.36128300  | -4.78556600 | -0.43648900 |
| H  | 8.48575000  | -4.43378600 | -0.56897400 |
| H  | 4.21206600  | -4.82686300 | -0.20277800 |
| H  | 6.42868000  | -5.82496700 | -0.75372400 |
| H  | 5.63139900  | -0.58106300 | 1.80558800  |
| H  | 7.10282200  | -0.20615000 | 0.83961900  |
| Br | 9.81057600  | 0.09643300  | 0.83038300  |
| C  | -0.26138700 | 4.72132900  | 2.92476900  |
| C  | -0.48254700 | 5.30989900  | 4.17091100  |
| C  | -1.70475600 | 5.92453300  | 4.44954300  |
| C  | -2.70145900 | 5.94559600  | 3.47184700  |
| C  | -2.47537700 | 5.35571700  | 2.22766300  |
| C  | -1.25329500 | 4.73319400  | 1.93343800  |
| H  | 0.69376500  | 4.24642800  | 2.71411200  |
| H  | 0.30261700  | 5.28913400  | 4.92311600  |

|    |             |            |             |
|----|-------------|------------|-------------|
| H  | -1.87814800 | 6.38501800 | 5.41966300  |
| H  | -3.65656600 | 6.42465800 | 3.67621700  |
| H  | -3.25209100 | 5.37765600 | 1.46723300  |
| C  | -1.01746500 | 4.10356300 | 0.58033300  |
| H  | 0.03529000  | 4.20534800 | 0.29536700  |
| H  | -1.59168400 | 4.60871400 | -0.20311000 |
| Br | -1.66892100 | 4.40764100 | -2.98767600 |

**P4**

-2 1

|   | x           | y           | z           |
|---|-------------|-------------|-------------|
| C | -0.26246400 | 1.29878500  | -1.51669900 |
| C | 0.95966300  | 1.01820500  | -0.60984700 |
| C | 2.12283300  | 1.99442300  | -0.98553900 |
| C | 3.49564800  | 1.80370200  | -0.69486900 |
| C | 0.45080200  | 1.07138700  | 0.83600800  |
| C | 0.68597900  | -0.02045900 | 1.79369600  |
| C | 1.15250400  | -1.25074300 | 1.37649000  |
| C | 1.40019800  | -1.48403200 | -0.05940600 |
| C | -0.68220900 | 1.74290000  | 1.22190000  |
| C | -1.20068700 | 1.13907100  | 2.45763100  |
| C | -0.33051300 | 0.04447100  | 2.81717200  |
| C | -0.85355700 | -1.12149200 | 3.38600400  |
| C | 0.61266400  | -2.46522900 | 1.94332200  |
| C | 0.99824200  | -2.84342800 | -0.34706200 |
| C | 0.39629000  | -3.16401200 | -1.56820400 |
| C | 0.15405200  | -2.11437400 | -2.52692700 |
| C | 0.52489400  | -0.79770400 | -2.21058200 |
| C | -0.36965100 | 0.29733200  | -2.53451200 |
| C | -1.36911600 | 2.01673300  | -1.13780200 |
| C | -1.57584100 | 2.55449500  | 0.29659200  |
| C | -2.56020500 | 1.04880100  | 2.69475800  |
| C | -3.51170800 | 1.55218000  | 1.68390100  |
| C | -3.04955000 | 2.13904200  | 0.52005800  |
| C | -3.67007600 | 1.79742200  | -0.72781900 |
| C | -2.63969200 | 1.72136300  | -1.74533800 |
| C | -2.75389000 | 0.77958900  | -2.77384500 |
| C | -1.58110200 | 0.05235000  | -3.19045200 |
| C | -1.97252500 | -1.31075400 | -3.48830900 |
| C | -1.12475900 | -2.37543900 | -3.16864600 |
| C | 0.51232900  | -3.44925200 | 0.88108400  |
| C | -3.53614900 | -4.29668000 | -1.13886200 |
| C | -2.62945400 | -4.76653400 | -0.18210600 |
| C | -2.87190400 | -4.52794400 | 1.22966600  |

|   |             |             |             |
|---|-------------|-------------|-------------|
| C | -4.01006500 | -3.82482000 | 1.63403100  |
| C | -4.94902700 | -3.33189100 | 0.64216700  |
| C | -4.96688700 | -2.51491200 | -1.68934300 |
| C | -3.93283300 | -2.59607300 | -2.70775800 |
| C | -3.05155300 | -3.70060000 | -2.37065200 |
| C | -1.67474400 | -3.58761400 | -2.59665800 |
| C | -0.73141200 | -4.07838400 | -1.60148200 |
| C | -1.20160400 | -4.65363200 | -0.41924200 |
| C | -1.59208800 | -4.27018200 | 1.87110000  |
| C | -1.49857300 | -3.32361000 | 2.89300900  |
| C | -2.68458500 | -2.58952500 | 3.31401300  |
| C | -3.91151900 | -2.83411500 | 2.69473500  |
| C | -4.78686300 | -1.72549100 | 2.35018600  |
| C | -5.43199000 | -2.03622300 | 1.08365700  |
| C | -5.66887100 | -1.02267800 | 0.15232700  |
| C | -5.42902800 | -1.26464500 | -1.26396200 |
| C | -3.40250700 | -1.42459900 | -3.25477700 |
| C | -3.88184600 | -0.12673100 | -2.80781600 |
| C | -4.88536000 | -0.04911300 | -1.83583200 |
| C | -4.78157400 | 0.93837900  | -0.77698300 |
| C | -5.27030100 | 0.34266900  | 0.44365500  |
| C | -4.63039100 | 0.63829400  | 1.65300000  |
| C | -4.39097100 | -0.41517200 | 2.62549800  |
| C | -3.11619000 | -0.15699400 | 3.27324200  |
| C | -2.27977800 | -1.22766800 | 3.61734600  |
| C | -0.56055800 | -4.34132100 | 0.84867600  |
| C | -0.37033400 | -2.41106400 | 2.94042500  |
| C | -4.71918800 | -3.56524400 | -0.71894400 |
| C | 2.74452700  | 4.03548100  | -2.19041200 |
| C | 1.78607200  | 3.12669600  | -1.74895300 |
| C | 4.44966300  | 2.71419200  | -1.18052600 |
| C | 4.10107000  | 3.84253100  | -1.92189900 |
| C | 4.03574600  | 0.73133000  | 0.20339100  |
| C | 1.21029100  | -0.47572400 | -0.98804800 |
| O | 5.21772000  | 0.27084800  | -0.23977500 |
| O | 3.49323000  | 0.37439500  | 1.23388000  |
| C | 5.15070200  | 4.80779400  | -2.42126000 |
| H | 4.93120000  | 5.83535400  | -2.10474700 |
| H | 6.14499700  | 4.54428800  | -2.04703100 |
| H | 5.19693200  | 4.81387600  | -3.51828100 |
| H | 5.49315800  | 2.52366000  | -0.95198900 |
| H | 2.40620800  | 4.89409800  | -2.76670400 |
| H | 0.75882800  | 3.32904000  | -2.04212600 |
| C | 5.99292600  | -0.62848900 | 0.61468400  |

|    |             |             |             |
|----|-------------|-------------|-------------|
| C  | 6.28371400  | -1.91374000 | -0.12471600 |
| C  | 7.59107000  | -2.41877100 | -0.14026000 |
| C  | 5.26214900  | -2.63094300 | -0.76274000 |
| C  | 7.85980600  | -3.63135800 | -0.78137200 |
| H  | 8.38494400  | -1.84832400 | 0.34895200  |
| C  | 5.53741800  | -3.83648500 | -1.40763700 |
| H  | 4.24723600  | -2.24176300 | -0.75850000 |
| C  | 6.84017400  | -4.34271400 | -1.41615300 |
| H  | 8.87828500  | -4.01461700 | -0.78912200 |
| H  | 4.73397600  | -4.38071400 | -1.89985900 |
| H  | 7.05635900  | -5.28467100 | -1.91756100 |
| H  | 5.40926500  | -0.80880800 | 1.52080300  |
| H  | 6.92342600  | -0.10766300 | 0.87550600  |
| Br | 9.55843200  | 0.15375600  | 1.65728700  |
| C  | -0.78276200 | 4.73824300  | 2.81377000  |
| C  | -1.12577200 | 5.30273600  | 4.04309400  |
| C  | -2.39820100 | 5.84422200  | 4.23585500  |
| C  | -3.32118900 | 5.81722800  | 3.18853900  |
| C  | -2.97310800 | 5.25107300  | 1.96139600  |
| C  | -1.70034800 | 4.69909200  | 1.75317600  |
| H  | 0.21162800  | 4.32311300  | 2.66908300  |
| H  | -0.39613400 | 5.32132400  | 4.84944700  |
| H  | -2.66657500 | 6.28673300  | 5.19268500  |
| H  | -4.31365400 | 6.24164900  | 3.32459300  |
| H  | -3.69150200 | 5.24134300  | 1.14536900  |
| C  | -1.33027200 | 4.10254700  | 0.41496500  |
| H  | -0.26603600 | 4.26275800  | 0.21350900  |
| H  | -1.86321200 | 4.58671000  | -0.41057400 |
| Br | -1.59304400 | 4.61549200  | -3.05460400 |

**P5**

-2 1

|   | x           | y           | z           |
|---|-------------|-------------|-------------|
| C | -0.15715900 | 1.05630000  | -1.89334500 |
| C | 0.88675100  | 1.08075000  | -0.74263800 |
| C | 2.18730900  | 1.71611900  | -1.33411900 |
| C | 3.50689800  | 1.27517500  | -1.07941300 |
| C | 0.31730300  | 1.82969600  | 0.59691800  |
| C | 0.09738200  | 0.87277100  | 1.78648700  |
| C | 0.54916200  | -0.42729100 | 1.85832600  |
| C | 1.03338100  | -1.10733300 | 0.63910200  |
| C | -1.12014600 | 2.35967500  | 0.44741600  |
| C | -1.86409900 | 2.13685400  | 1.64356900  |
| C | -1.11822700 | 1.21433700  | 2.47808600  |

|   |             |             |             |
|---|-------------|-------------|-------------|
| C | -1.79999800 | 0.29299600  | 3.28250200  |
| C | -0.16016700 | -1.40979100 | 2.64739400  |
| C | 0.62275000  | -2.49024500 | 0.71311000  |
| C | 0.24525700  | -3.18772000 | -0.43980800 |
| C | 0.23915200  | -2.49472600 | -1.70346100 |
| C | 0.61086800  | -1.14443300 | -1.74312500 |
| C | -0.13569300 | -0.21226000 | -2.56393200 |
| C | -1.29839900 | 1.82422100  | -1.94955100 |
| C | -1.79106300 | 2.52944200  | -0.74795900 |
| C | -3.26883800 | 2.13294700  | 1.66443600  |
| C | -3.96983800 | 2.27464400  | 0.41416700  |
| C | -3.23839500 | 2.44945700  | -0.76757100 |
| C | -3.64251000 | 1.73989400  | -1.96348700 |
| C | -2.44731300 | 1.35995000  | -2.69301300 |
| C | -2.41346100 | 0.14613000  | -3.38838500 |
| C | -1.22167100 | -0.66325700 | -3.32665400 |
| C | -1.62300200 | -2.05814200 | -3.26062400 |
| C | -0.90777300 | -2.95686600 | -2.46874600 |
| C | -0.11359200 | -2.68079800 | 1.94842300  |
| C | -3.74665300 | -4.17222600 | -0.44293900 |
| C | -3.05818200 | -4.30760900 | 0.76645600  |
| C | -3.54833500 | -3.63982200 | 1.96400200  |
| C | -4.70636300 | -2.85871400 | 1.90386200  |
| C | -5.41765900 | -2.71357100 | 0.64382700  |
| C | -4.95329200 | -2.66165300 | -1.78121200 |
| C | -3.75720600 | -3.04937000 | -2.50841000 |
| C | -3.01125800 | -3.98361600 | -1.68093100 |
| C | -1.61399100 | -3.93757500 | -1.66319200 |
| C | -0.89874500 | -4.07988400 | -0.40497400 |
| C | -1.60898000 | -4.25937800 | 0.78540500  |
| C | -2.40116700 | -3.17761700 | 2.72145300  |
| C | -2.45198200 | -1.95359600 | 3.39418000  |
| C | -3.65832900 | -1.14036000 | 3.33194400  |
| C | -4.76693500 | -1.58879500 | 2.60463400  |
| C | -5.51024000 | -0.65469900 | 1.77490100  |
| C | -5.91352900 | -1.34984200 | 0.56466400  |
| C | -5.91143000 | -0.67737200 | -0.66043000 |
| C | -5.42158600 | -1.34661800 | -1.85766900 |
| C | -3.07600100 | -2.10528700 | -3.28250300 |
| C | -3.56438000 | -0.73808900 | -3.36338900 |
| C | -4.71498000 | -0.36728600 | -2.66078700 |
| C | -4.76430600 | 0.90587500  | -1.96062000 |
| C | -5.50916100 | 0.71446500  | -0.72816300 |
| C | -5.11674100 | 1.38496600  | 0.43424100  |



|    |             |             |             |
|----|-------------|-------------|-------------|
| C  | -5.11859300 | 0.68544200  | 1.70904200  |
| C  | -3.96668600 | 1.14679500  | 2.46696600  |
| C  | -3.25576400 | 0.25111900  | 3.26906900  |
| C  | -1.20144500 | -3.55415800 | 1.99064300  |
| C  | -1.30918700 | -1.05924800 | 3.36745600  |
| C  | -4.94810500 | -3.35614100 | -0.50441800 |
| C  | 3.11098500  | 3.30637100  | -2.94700700 |
| C  | 2.02896200  | 2.75221700  | -2.26926700 |
| C  | 4.58092800  | 1.81163300  | -1.81077500 |
| C  | 4.40844800  | 2.82367900  | -2.75458900 |
| C  | 3.90508300  | 0.37842600  | 0.05780500  |
| C  | 1.05829900  | -0.44697400 | -0.56770300 |
| O  | 4.87392900  | -0.47074300 | -0.30747400 |
| O  | 3.45099200  | 0.48023400  | 1.18640500  |
| C  | 5.58130900  | 3.37625700  | -3.53002900 |
| H  | 5.51499900  | 4.46630600  | -3.63045700 |
| H  | 6.53120000  | 3.13507700  | -3.04242600 |
| H  | 5.61902500  | 2.96008700  | -4.54632000 |
| H  | 5.57680700  | 1.43301400  | -1.60293100 |
| H  | 2.92755600  | 4.12869800  | -3.63555200 |
| H  | 1.04704900  | 3.18765300  | -2.43801500 |
| C  | 5.58099900  | -1.23609100 | 0.72408600  |
| C  | 5.64991800  | -2.68454400 | 0.30377100  |
| C  | 6.89641400  | -3.30124100 | 0.13251700  |
| C  | 4.47983100  | -3.43062700 | 0.10295500  |
| C  | 6.95974200  | -4.64985300 | -0.23071700 |
| H  | 7.80409400  | -2.71177600 | 0.28748200  |
| C  | 4.54801700  | -4.77292300 | -0.26750900 |
| H  | 3.51053100  | -2.95647100 | 0.23534100  |
| C  | 5.79254600  | -5.38780100 | -0.43404600 |
| H  | 7.93199200  | -5.12098100 | -0.36117300 |
| H  | 3.63080200  | -5.33715700 | -0.42322500 |
| H  | 5.84821200  | -6.43654000 | -0.72152800 |
| H  | 5.03501400  | -1.10807300 | 1.66166400  |
| H  | 6.58712400  | -0.80328500 | 0.80747400  |
| Br | 9.31323300  | -0.59606700 | 0.84704400  |
| C  | 1.27920400  | 3.59455500  | 3.44847700  |
| C  | 0.90360900  | 4.40255700  | 4.52348400  |
| C  | 0.08626900  | 5.51399200  | 4.30965800  |
| C  | -0.34802800 | 5.81172400  | 3.01562000  |
| C  | 0.02689800  | 5.00492000  | 1.94014400  |
| C  | 0.84395200  | 3.88158400  | 2.14740400  |
| H  | 1.92313500  | 2.73376800  | 3.61435300  |
| H  | 1.25376000  | 4.16508300  | 5.52582800  |

|    |             |            |             |
|----|-------------|------------|-------------|
| H  | -0.20657100 | 6.14640100 | 5.14552900  |
| H  | -0.98071600 | 6.67871500 | 2.83864300  |
| H  | -0.30834500 | 5.23810000 | 0.92924800  |
| C  | 1.27302500  | 3.02852200 | 0.97434900  |
| H  | 2.26210400  | 2.60402600 | 1.16203500  |
| H  | 1.32726700  | 3.66921400 | 0.09112700  |
| Br | -0.91137100 | 5.06195600 | -1.97914700 |

**P7**

-2 1

|   | x           | y           | z           |
|---|-------------|-------------|-------------|
| C | 0.07437700  | 1.30211100  | -1.88584500 |
| C | 1.41655600  | 1.12532600  | -1.09473200 |
| C | 2.50533200  | 2.20889600  | -1.25371200 |
| C | 3.62796100  | 2.01895800  | -2.07549900 |
| C | 0.97965400  | 1.10336400  | 0.36134000  |
| C | 1.40866100  | 0.08126800  | 1.31526000  |
| C | 1.92854200  | -1.11659300 | 0.89920500  |
| C | 2.41801200  | -1.41757800 | -0.51874800 |
| C | -0.11404000 | 1.76016200  | 0.86672700  |
| C | -0.44558200 | 1.16936200  | 2.16933500  |
| C | 0.51971700  | 0.14023200  | 2.45393300  |
| C | 0.14270900  | -1.02233500 | 3.13066600  |
| C | 1.51525800  | -2.32520700 | 1.57024400  |
| C | 1.73298000  | -2.79484200 | -0.70786100 |
| C | 0.98703600  | -3.15930900 | -1.80829300 |
| C | 0.54479200  | -2.13244500 | -2.76705200 |
| C | 0.83046500  | -0.81074200 | -2.52497800 |
| C | -0.11232200 | 0.21418800  | -2.80225200 |
| C | -1.05767600 | 1.92392800  | -1.38837300 |
| C | -1.15751000 | 2.49622200  | 0.03819400  |
| C | -1.76027200 | 1.01379900  | 2.57057300  |
| C | -2.84811700 | 1.42359400  | 1.66202200  |
| C | -2.56199900 | 1.99320900  | 0.43972700  |
| C | -3.31163700 | 1.61069700  | -0.72371500 |
| C | -2.36958100 | 1.52580500  | -1.83400900 |
| C | -2.54038000 | 0.54585000  | -2.81533700 |
| C | -1.37742400 | -0.12889400 | -3.31615400 |
| C | -1.70937300 | -1.51393000 | -3.53710100 |
| C | -0.75924300 | -2.50240600 | -3.25584400 |
| C | 1.37691200  | -3.35931700 | 0.56794500  |
| C | -2.80479800 | -4.51741600 | -0.94426100 |
| C | -1.77409400 | -4.90550500 | -0.08152500 |
| C | -1.87699000 | -4.62808300 | 1.33992200  |

|   |             |             |             |
|---|-------------|-------------|-------------|
| C | -3.00461900 | -3.97270200 | 1.84377500  |
| C | -4.07415300 | -3.57226000 | 0.94733600  |
| C | -4.39198700 | -2.84285000 | -1.39463100 |
| C | -3.48020900 | -2.89880800 | -2.51855700 |
| C | -2.49114100 | -3.92597600 | -2.23720500 |
| C | -1.15644700 | -3.73161900 | -2.59999500 |
| C | -0.08195700 | -4.12994100 | -1.70310300 |
| C | -0.38599900 | -4.71819300 | -0.47182900 |
| C | -0.55232500 | -4.26921400 | 1.82296000  |
| C | -0.41048100 | -3.27693400 | 2.79236800  |
| C | -1.58298000 | -2.59961600 | 3.32444300  |
| C | -2.85433200 | -2.93713800 | 2.85504000  |
| C | -3.83242100 | -1.89805600 | 2.57749600  |
| C | -4.58737100 | -2.29208400 | 1.39968400  |
| C | -4.98240400 | -1.32919700 | 0.46597300  |
| C | -4.88610100 | -1.60862400 | -0.95570100 |
| C | -3.09429500 | -1.71074300 | -3.15568600 |
| C | -3.61353200 | -0.43107000 | -2.70864500 |
| C | -4.48515000 | -0.38002900 | -1.61861000 |
| C | -4.34310100 | 0.65562200  | -0.61498400 |
| C | -4.64465100 | 0.07004400  | 0.66557200  |
| C | -3.90564800 | 0.44731800  | 1.79224100  |
| C | -3.48987000 | -0.55416100 | 2.75853800  |
| C | -2.16988200 | -0.19783300 | 3.24749500  |
| C | -1.23308000 | -1.20283400 | 3.53312100  |
| C | 0.36360900  | -4.32228800 | 0.69526200  |
| C | 0.65228300  | -2.29264000 | 2.67094200  |
| C | -3.97670200 | -3.84358600 | -0.42302000 |
| C | 3.52164200  | 4.29896100  | -0.51954800 |
| C | 2.47081500  | 3.38361900  | -0.49711200 |
| C | 4.69425100  | 2.92296200  | -2.06777700 |
| C | 4.67494200  | 4.06437400  | -1.26981700 |
| C | 3.79734500  | 0.82076500  | -2.90769300 |
| C | 1.95129500  | -0.32597400 | -1.62641200 |
| O | 3.01655200  | -0.25270700 | -2.61458400 |
| O | 4.58514300  | 0.70700500  | -3.82318400 |
| C | 5.91463700  | 4.90258900  | -1.11325300 |
| H | 6.41274800  | 5.08671800  | -2.07302200 |
| H | 5.70135700  | 5.86821600  | -0.64020600 |
| H | 6.60327000  | 4.33119800  | -0.47379300 |
| H | 5.56754100  | 2.67748700  | -2.66091900 |
| H | 3.46551500  | 5.17857400  | 0.11868400  |
| H | 1.64289200  | 3.56385500  | 0.17249700  |
| C | 5.30861100  | -1.87613700 | 1.58863000  |

|    |             |             |             |
|----|-------------|-------------|-------------|
| C  | 5.92413400  | -2.70271000 | 2.53170900  |
| C  | 5.87905500  | -4.09146200 | 2.39898900  |
| C  | 5.22888900  | -4.65543600 | 1.29909100  |
| C  | 4.61657500  | -3.83120400 | 0.35419100  |
| C  | 4.63035000  | -2.43473000 | 0.49409300  |
| H  | 5.41460700  | -0.79273700 | 1.65523500  |
| H  | 6.45485600  | -2.25080600 | 3.36669200  |
| H  | 6.36001400  | -4.73082400 | 3.13716900  |
| H  | 5.20232800  | -5.73603000 | 1.17213300  |
| H  | 4.12440400  | -4.27738600 | -0.50688900 |
| C  | 4.00026300  | -1.52609800 | -0.54416100 |
| H  | 4.27766100  | -1.86826800 | -1.54415500 |
| H  | 4.42197500  | -0.52107400 | -0.41468700 |
| Br | 6.48358600  | 1.51338500  | 0.58518800  |
| C  | -2.63116000 | 5.13348100  | 1.76574500  |
| C  | -2.86122600 | 5.72558300  | 3.00892900  |
| C  | -1.81564600 | 5.89489100  | 3.91927900  |
| C  | -0.53093900 | 5.46913300  | 3.57670400  |
| C  | -0.29978300 | 4.87791800  | 2.33344400  |
| C  | -1.34244400 | 4.70105700  | 1.41219100  |
| H  | -3.43948600 | 5.01010700  | 1.04558100  |
| H  | -3.86524000 | 6.05822400  | 3.26436300  |
| H  | -1.99899900 | 6.35657700  | 4.88767300  |
| H  | 0.29345400  | 5.59543800  | 4.27522200  |
| H  | 0.70567500  | 4.55147500  | 2.07752000  |
| C  | -1.10541400 | 4.06951700  | 0.05571400  |
| H  | -0.13633800 | 4.37981400  | -0.34570700 |
| H  | -1.88423800 | 4.40317500  | -0.63986500 |
| Br | -4.44623200 | 4.29271600  | -1.49288800 |

**RL6<sup>2-</sup>**

-2 1

|   | x           | y           | z           |
|---|-------------|-------------|-------------|
| C | -2.45096600 | 1.44374900  | -0.09460700 |
| C | -1.57438300 | 1.91404300  | -1.26067500 |
| C | -1.25890200 | 1.13148000  | -2.35064900 |
| C | -1.52828000 | -0.31111500 | -2.33936300 |
| C | -1.62551500 | 1.94831800  | 1.09583700  |
| C | -0.68757200 | 2.93140300  | 0.64520900  |
| C | -0.65531900 | 2.91068400  | -0.79682900 |
| C | 0.55525500  | 3.14490100  | -1.48576800 |
| C | 0.00484000  | 1.32771600  | -3.05267000 |
| C | -0.41638600 | -0.95669600 | -3.03005300 |
| C | 0.05596900  | -2.20106200 | -2.57195600 |

|   |             |             |             |
|---|-------------|-------------|-------------|
| C | -0.54034200 | -2.81952200 | -1.43056800 |
| C | -1.58656300 | -2.15163700 | -0.74729500 |
| C | -1.61725500 | -2.13182700 | 0.69303700  |
| C | -2.14804100 | -0.87492500 | 1.12383000  |
| C | -1.62202000 | -0.24669000 | 2.23567700  |
| C | -1.35345800 | 1.19245400  | 2.21853400  |
| C | 0.49572900  | 3.18659000  | 1.37736200  |
| C | 0.78272200  | 2.39885600  | 2.54033300  |
| C | -0.11890400 | 1.40922900  | 2.96681600  |
| C | 0.35762700  | 0.14471000  | 3.46335900  |
| C | -0.53950000 | -0.87417500 | 2.98909100  |
| C | -0.05003200 | -2.12977800 | 2.58552000  |
| C | -0.60041900 | -2.78247100 | 1.43833200  |
| C | 0.50288900  | -3.42438000 | 0.73251300  |
| C | 0.53380600  | -3.44498900 | -0.66132200 |
| C | 0.50053200  | 0.04983700  | -3.49208400 |
| C | 3.89920200  | -2.00507300 | -1.08502300 |
| C | 3.62202900  | -1.24632900 | -2.22882000 |
| C | 3.88294000  | 0.17688000  | -2.24301100 |
| C | 4.41499700  | 0.80953400  | -1.11284100 |
| C | 4.70234300  | 0.02398900  | 0.07721100  |
| C | 3.85119900  | -1.97183200 | 1.26050500  |
| C | 2.94777500  | -3.01206500 | 0.80091800  |
| C | 2.97960300  | -3.03336100 | -0.63752500 |
| C | 1.78590200  | -3.25356100 | -1.37040300 |
| C | 1.49538900  | -2.46447300 | -2.54186900 |
| C | 2.38950600  | -1.47414200 | -2.98162900 |
| C | 2.80910800  | 0.81306500  | -3.00465900 |
| C | 2.32724000  | 2.06626200  | -2.58638800 |
| C | 2.88298700  | 2.72254800  | -1.42946500 |
| C | 3.92256100  | 2.10654600  | -0.68844600 |
| C | 3.89041800  | 2.12547700  | 0.75048500  |
| C | 4.36645800  | 0.84043200  | 1.23269600  |
| C | 3.78770100  | 0.24071200  | 2.35632900  |
| C | 3.52668300  | -1.18449100 | 2.37036200  |
| C | 1.72686000  | -3.21113900 | 1.48872000  |
| C | 1.38852500  | -2.39395900 | 2.62680800  |
| C | 2.26525200  | -1.39200300 | 3.07828300  |
| C | 1.76409800  | -0.11259300 | 3.51192200  |
| C | 2.68477800  | 0.89597700  | 3.05557000  |
| C | 2.22049100  | 2.13699500  | 2.58216400  |
| C | 2.82281900  | 2.75897400  | 1.43045400  |
| C | 1.75357300  | 3.38318800  | 0.66593500  |
| C | 1.78492600  | 3.36441600  | -0.72804200 |

|   |             |             |             |
|---|-------------|-------------|-------------|
| C | 1.90750000  | -0.20767400 | -3.47258900 |
| C | 0.88918900  | 2.32904000  | -2.61536300 |
| C | 4.45061800  | -1.34990300 | 0.09079600  |
| C | -6.11662700 | -2.04969600 | -0.06521600 |
| C | -4.76395300 | -1.74542600 | -0.11746900 |
| C | -4.30489200 | -0.41442200 | -0.07429300 |
| C | -5.27696400 | 0.58627900  | 0.01022300  |
| C | -6.64633600 | 0.27107000  | 0.06900800  |
| C | -7.09210700 | -1.04259900 | 0.03619700  |
| C | -2.78811400 | -0.12557800 | -0.08031000 |
| C | -4.92272300 | 2.02538000  | -0.00500900 |
| C | -2.10542000 | -0.90790000 | -1.23680700 |
| O | -3.63932300 | 2.34953400  | -0.14999700 |
| O | -5.76020100 | 2.91292700  | 0.06361100  |
| C | -8.56311300 | -1.38413700 | 0.10080000  |
| H | -8.79354600 | -2.02036900 | 0.96619700  |
| H | -9.17574400 | -0.47973500 | 0.18085900  |
| H | -8.89241700 | -1.93140800 | -0.79310900 |
| H | -7.34374500 | 1.10079600  | 0.13474400  |
| H | -6.42452100 | -3.09409000 | -0.10132200 |
| H | -4.04143400 | -2.54953400 | -0.18720100 |

**TSb1-1**

-2 1

|   | x           | y           | z           |
|---|-------------|-------------|-------------|
| C | 2.29885300  | 1.36325100  | 0.07045300  |
| C | 1.59672800  | 1.87989600  | 1.23673300  |
| C | 1.28683000  | 1.09946900  | 2.36106000  |
| C | 1.52493100  | -0.33662300 | 2.32048600  |
| C | 1.62336600  | 1.93482800  | -1.08541400 |
| C | 0.67622600  | 2.92882600  | -0.63649300 |
| C | 0.65968300  | 2.89446000  | 0.81395600  |
| C | -0.52536900 | 3.13538300  | 1.50552400  |
| C | 0.02754600  | 1.29734500  | 3.05267500  |
| C | 0.41888800  | -0.99621700 | 3.02043200  |
| C | -0.06642700 | -2.23229600 | 2.55246700  |
| C | 0.51250200  | -2.83673000 | 1.38961200  |
| C | 1.53672000  | -2.14932600 | 0.70295900  |
| C | 1.55347000  | -2.11545100 | -0.74454300 |
| C | 2.11108100  | -0.86740700 | -1.16843200 |
| C | 1.57650900  | -0.22808700 | -2.27461700 |
| C | 1.33870300  | 1.20814400  | -2.25200700 |
| C | -0.49303100 | 3.20287300  | -1.34252900 |
| C | -0.80423500 | 2.42105300  | -2.52821600 |

|   |             |             |             |
|---|-------------|-------------|-------------|
| C | 0.09562400  | 1.43947700  | -2.96207800 |
| C | -0.40950000 | 0.17188800  | -3.46900300 |
| C | 0.48723400  | -0.85335100 | -3.03015700 |
| C | -0.00772200 | -2.10987200 | -2.63198700 |
| C | 0.54542400  | -2.76903100 | -1.48610600 |
| C | -0.54914900 | -3.42380800 | -0.77248300 |
| C | -0.56502200 | -3.45710000 | 0.62136500  |
| C | -0.48804200 | 0.00735400  | 3.48761200  |
| C | -3.91906000 | -1.99557500 | 1.09582600  |
| C | -3.62638200 | -1.25455600 | 2.24876000  |
| C | -3.86195800 | 0.17702500  | 2.27615900  |
| C | -4.39226700 | 0.81786400  | 1.15450800  |
| C | -4.69747400 | 0.05077900  | -0.03991600 |
| C | -3.89279200 | -1.94013900 | -1.25329200 |
| C | -2.98304600 | -2.98390900 | -0.81706900 |
| C | -2.99945600 | -3.01816700 | 0.63152400  |
| C | -1.80843000 | -3.25410500 | 1.33724600  |
| C | -1.49994200 | -2.47919600 | 2.52985900  |
| C | -2.38884600 | -1.49742400 | 2.97788100  |
| C | -2.79463000 | 0.80314300  | 3.05318800  |
| C | -2.28891600 | 2.05585200  | 2.63158500  |
| C | -2.84479100 | 2.72249500  | 1.47503800  |
| C | -3.88741800 | 2.12221700  | 0.73839000  |
| C | -3.87095100 | 2.15616300  | -0.70054300 |
| C | -4.36622600 | 0.87334900  | -1.18958600 |
| C | -3.80998700 | 0.28584700  | -2.32795500 |
| C | -3.57456600 | -1.14570400 | -2.36312800 |
| C | -1.77627900 | -3.18634900 | -1.50582700 |
| C | -1.44128400 | -2.35649600 | -2.65322400 |
| C | -2.32046200 | -1.35434700 | -3.07453400 |
| C | -1.80927100 | -0.06157100 | -3.49723100 |
| C | -2.72558500 | 0.94736300  | -3.04974800 |
| C | -2.23002900 | 2.17841600  | -2.55801800 |
| C | -2.81202200 | 2.78966000  | -1.38397900 |
| C | -1.74295300 | 3.41403300  | -0.62449300 |
| C | -1.75891300 | 3.38102300  | 0.77026300  |
| C | -1.88801100 | -0.22641800 | 3.47256200  |
| C | -0.86278200 | 2.29885000  | 2.64550600  |
| C | -4.47350100 | -1.33333200 | -0.07010300 |
| C | 6.04314100  | -2.11578300 | 0.02897600  |
| C | 4.70949700  | -1.73238000 | 0.05209800  |
| C | 4.30628500  | -0.38136900 | 0.03863700  |
| C | 5.32570900  | 0.58724300  | 0.00103300  |
| C | 6.67173100  | 0.17855700  | -0.02821300 |

|   |            |             |             |
|---|------------|-------------|-------------|
| C | 7.06166300 | -1.15475200 | -0.01406300 |
| C | 2.75931100 | -0.12210900 | 0.04040800  |
| C | 5.12193300 | 2.09657600  | 0.00445200  |
| C | 2.08615900 | -0.92333200 | 1.19815000  |
| O | 3.91892200 | 2.52591200  | 0.11745600  |
| O | 6.11982800 | 2.83053500  | -0.08406500 |
| C | 8.51978800 | -1.55444700 | -0.03616300 |
| H | 8.73958600 | -2.24756700 | -0.86002700 |
| H | 9.16632200 | -0.67830700 | -0.15609300 |
| H | 8.81850800 | -2.06141100 | 0.89261200  |
| H | 7.40552300 | 0.97823700  | -0.06265900 |
| H | 6.29211500 | -3.17684000 | 0.04223500  |
| H | 3.95507800 | -2.50935200 | 0.07941400  |

**TSb1**

-2 1

|   | x           | y           | z           |
|---|-------------|-------------|-------------|
| C | -1.50773100 | 0.50571800  | -0.32076300 |
| C | -1.20143900 | -0.43027100 | 0.84335400  |
| C | -0.62768300 | 0.00327800  | 2.04190000  |
| C | -0.07958000 | 1.33511200  | 2.17122400  |
| C | -0.98631100 | -0.29849200 | -1.51256600 |
| C | -0.77865300 | -1.65957600 | -1.09872500 |
| C | -0.91990900 | -1.73153000 | 0.34527200  |
| C | -0.11787000 | -2.64594600 | 1.07415300  |
| C | 0.23360500  | -0.90506300 | 2.78865200  |
| C | 1.12681500  | 1.23590200  | 2.98761400  |
| C | 2.24567500  | 2.03016800  | 2.70542700  |
| C | 2.21931300  | 2.94864100  | 1.59012400  |
| C | 1.05283900  | 2.98653000  | 0.77625900  |
| C | 1.19300100  | 3.05516900  | -0.66474400 |
| C | 0.10387800  | 2.34044600  | -1.27433100 |
| C | 0.33116000  | 1.59981200  | -2.41228200 |
| C | -0.23233200 | 0.23496000  | -2.52978800 |
| C | 0.14116800  | -2.47323300 | -1.76604700 |
| C | 0.92293800  | -1.92277700 | -2.84063700 |
| C | 0.74616000  | -0.58096900 | -3.21839500 |
| C | 1.89513300  | 0.24276000  | -3.51785100 |
| C | 1.64293100  | 1.57562600  | -3.02202900 |
| C | 2.69510400  | 2.32303100  | -2.45620900 |
| C | 2.46210100  | 3.07861300  | -1.25992900 |
| C | 3.66465300  | 3.00733600  | -0.42390200 |
| C | 3.51719500  | 2.92805100  | 0.97221300  |
| C | 1.30101600  | -0.14009300 | 3.39842900  |



|   |             |             |             |
|---|-------------|-------------|-------------|
| C | 5.48916900  | -0.16423900 | 1.46907900  |
| C | 4.72324300  | -0.69725800 | 2.50902600  |
| C | 4.16430000  | -2.03603300 | 2.38669000  |
| C | 4.39417900  | -2.78187900 | 1.22708600  |
| C | 5.18021400  | -2.22118400 | 0.14271500  |
| C | 5.69957700  | -0.02270100 | -0.87282600 |
| C | 5.45985200  | 1.30467500  | -0.37685900 |
| C | 5.31001700  | 1.22289600  | 1.06442200  |
| C | 4.37017800  | 2.01603200  | 1.73136200  |
| C | 3.58098600  | 1.46647700  | 2.81458100  |
| C | 3.75088200  | 0.12595200  | 3.20411200  |
| C | 2.85196500  | -2.02489300 | 3.00452800  |
| C | 1.81083400  | -2.77141000 | 2.42240100  |
| C | 2.04853300  | -3.54189800 | 1.22005300  |
| C | 3.31531900  | -3.55330400 | 0.62462700  |
| C | 3.45504400  | -3.49168100 | -0.81691600 |
| C | 4.59301600  | -2.66300900 | -1.11575200 |
| C | 4.57310400  | -1.77488400 | -2.21135900 |
| C | 5.12751900  | -0.45276700 | -2.09180600 |
| C | 4.63214200  | 2.19804700  | -1.10750900 |
| C | 4.02890600  | 1.75074700  | -2.35438300 |
| C | 4.26763400  | 0.46011600  | -2.83523500 |
| C | 3.19163600  | -0.30643200 | -3.43714700 |
| C | 3.36949500  | -1.68579600 | -3.03386700 |
| C | 2.26005800  | -2.48684200 | -2.74183400 |
| C | 2.28891800  | -3.41295300 | -1.62224700 |
| C | 0.98905500  | -3.39884900 | -1.01065100 |
| C | 0.85199600  | -3.45757400 | 0.38569500  |
| C | 2.59888700  | -0.69301900 | 3.50378700  |
| C | 0.48074400  | -2.19856600 | 2.31258600  |
| C | 5.71724600  | -0.93732800 | 0.26027000  |
| C | -2.68083800 | 5.42761200  | -0.07917900 |
| C | -1.71573500 | 4.43275600  | -0.17825900 |
| C | -2.05735700 | 3.07072000  | -0.18018300 |
| C | -3.42682000 | 2.75558400  | -0.10215500 |
| C | -4.40411100 | 3.77477600  | 0.02659000  |
| C | -4.05045200 | 5.11118300  | 0.04281300  |
| C | -0.95002700 | 1.99572000  | -0.19341800 |
| C | -3.87107800 | 1.38517600  | -0.23331400 |
| C | -0.09488200 | 2.21350900  | 1.08648600  |
| O | -3.02132400 | 0.42247000  | -0.48889200 |
| O | -5.10903600 | 1.10692900  | -0.15662200 |
| C | -5.08683700 | 6.20224800  | 0.17575400  |
| H | -6.09837600 | 5.78572000  | 0.22369300  |

|    |             |             |             |
|----|-------------|-------------|-------------|
| H  | -4.92808400 | 6.80007900  | 1.08351600  |
| H  | -5.05073600 | 6.89754500  | -0.67383400 |
| H  | -5.44428200 | 3.47451400  | 0.09708500  |
| H  | -2.36923900 | 6.47051900  | -0.09093000 |
| H  | -0.67230900 | 4.71553000  | -0.24465500 |
| C  | -5.81404200 | -0.52913300 | -0.57492200 |
| H  | -6.66633300 | -0.08171000 | -1.05522300 |
| H  | -5.03466300 | -0.89365400 | -1.22632900 |
| C  | -5.97911700 | -1.13299900 | 0.75759000  |
| C  | -7.19352300 | -0.99794800 | 1.44876400  |
| C  | -4.90525900 | -1.78019900 | 1.38668800  |
| C  | -7.33309100 | -1.50336400 | 2.73714100  |
| H  | -8.03338400 | -0.52570900 | 0.94753100  |
| C  | -5.04639700 | -2.28572800 | 2.67855000  |
| H  | -3.95554900 | -1.87410400 | 0.86905900  |
| C  | -6.25817000 | -2.14869400 | 3.35784700  |
| H  | -8.28283900 | -1.40209200 | 3.25801800  |
| H  | -4.20396500 | -2.78180300 | 3.15324600  |
| H  | -6.36680000 | -2.54348700 | 4.36577200  |
| Br | -7.32431700 | -2.47730700 | -1.90485400 |

### TSb2-1

-2 1

|   | x           | y           | z           |
|---|-------------|-------------|-------------|
| C | 0.61513000  | 1.65489900  | -1.37475100 |
| C | 1.00096100  | 2.12706200  | 0.06110000  |
| C | 2.21506800  | 3.10241000  | 0.05101300  |
| C | 3.55256900  | 2.78579400  | 0.35530800  |
| C | -0.23487200 | 2.78361000  | 0.69782700  |
| C | -0.74867300 | 2.38518600  | 1.96173900  |
| C | -0.27706800 | 1.25728300  | 2.66110000  |
| C | 0.69815900  | 0.39993100  | 1.96832900  |
| C | -1.32340800 | 3.26770500  | -0.07108000 |
| C | -2.53558400 | 3.27677800  | 0.75458700  |
| C | -2.17396800 | 2.72067000  | 2.03191100  |
| C | -3.06690700 | 1.90328900  | 2.72522700  |
| C | -1.21417100 | 0.40108500  | 3.32824300  |
| C | 0.36713600  | -0.98125300 | 2.27092900  |
| C | 0.55172400  | -1.98313700 | 1.31104400  |
| C | 1.05201700  | -1.62682200 | 0.00784900  |
| C | 1.33235500  | -0.28458200 | -0.27125700 |
| C | 0.97099300  | 0.27724600  | -1.56059200 |
| C | -0.45224600 | 2.17418400  | -2.09225200 |
| C | -1.44314000 | 3.06135400  | -1.46380400 |

|   |             |             |             |
|---|-------------|-------------|-------------|
| C | -3.78259800 | 3.01086900  | 0.19110200  |
| C | -3.90044500 | 2.74072300  | -1.23024000 |
| C | -2.72549600 | 2.73949700  | -2.01618900 |
| C | -2.54767300 | 1.69499100  | -3.02421300 |
| C | -1.14366900 | 1.35413800  | -3.06956800 |
| C | -0.74847500 | 0.02820200  | -3.29326000 |
| C | 0.33887700  | -0.52295600 | -2.52451800 |
| C | 0.01975600  | -1.91067900 | -2.21763300 |
| C | 0.36737000  | -2.44686600 | -0.98010100 |
| C | -0.81316700 | -0.98675300 | 3.10400400  |
| C | -2.99890400 | -3.60267600 | 0.00784900  |
| C | -2.88751200 | -3.32523200 | 1.37498500  |
| C | -3.87134500 | -2.46875300 | 2.02506400  |
| C | -4.93134200 | -1.93970400 | 1.28302200  |
| C | -5.03855200 | -2.22408100 | -0.13688300 |
| C | -3.58798400 | -2.69050000 | -2.07552200 |
| C | -2.17760700 | -3.03507900 | -2.12136400 |
| C | -1.81239100 | -3.59879900 | -0.83156500 |
| C | -0.56428400 | -3.30914700 | -0.27434800 |
| C | -0.44691400 | -3.02119600 | 1.14753500  |
| C | -1.59167400 | -3.02380200 | 1.95129400  |
| C | -3.18995400 | -1.66106600 | 3.01976700  |
| C | -3.57519200 | -0.32617100 | 3.21586600  |
| C | -4.68132200 | 0.22597100  | 2.44373100  |
| C | -5.34172800 | -0.56006000 | 1.49803000  |
| C | -5.70572600 | 0.00451000  | 0.20811100  |
| C | -5.52103500 | -1.02729000 | -0.80200000 |
| C | -5.02887700 | -0.67944000 | -2.06352600 |
| C | -4.04611400 | -1.53466500 | -2.71825700 |
| C | -1.27751700 | -2.20717300 | -2.79823600 |
| C | -1.75224700 | -1.00476200 | -3.46661900 |
| C | -3.11093200 | -0.67549100 | -3.41683200 |
| C | -3.52020200 | 0.70560800  | -3.19936100 |
| C | -4.71877900 | 0.70215100  | -2.38028200 |
| C | -4.88001000 | 1.69502900  | -1.39993400 |
| C | -5.39680700 | 1.33363500  | -0.08492200 |
| C | -4.71755300 | 2.15416500  | 0.90287400  |
| C | -4.36631800 | 1.61165800  | 2.14155000  |
| C | -1.77661200 | -1.99014800 | 2.95977500  |
| C | -2.58975700 | 0.71346100  | 3.40227000  |
| C | -4.09831100 | -3.05227300 | -0.76462700 |
| C | 2.88478400  | 5.43964500  | -0.27343300 |
| C | 1.91814400  | 4.44242000  | -0.26122500 |
| C | 4.50638000  | 3.82110100  | 0.39076300  |

|    |            |             |             |
|----|------------|-------------|-------------|
| C  | 4.20967900 | 5.14261000  | 0.06934900  |
| C  | 4.17166100 | 1.40792700  | 0.62538100  |
| C  | 1.21572600 | 0.74161100  | 0.72958100  |
| O  | 4.11575000 | 0.60012700  | -0.36954900 |
| O  | 4.77859000 | 1.25054300  | 1.69814300  |
| C  | 5.27716400 | 6.21342300  | 0.08149400  |
| H  | 4.94244200 | 7.11357600  | 0.61422200  |
| H  | 6.19118900 | 5.85598100  | 0.56812200  |
| H  | 5.54940700 | 6.52799700  | -0.93633000 |
| H  | 5.51802100 | 3.55486400  | 0.68651300  |
| H  | 2.60151900 | 6.45989500  | -0.53078000 |
| H  | 0.89037300 | 4.70845200  | -0.48574300 |
| C  | 5.75049000 | -0.72680500 | -0.34770200 |
| C  | 5.07529800 | -1.93642600 | 0.13278000  |
| C  | 4.74083800 | -2.97541400 | -0.74929100 |
| C  | 4.73850600 | -2.06237200 | 1.49027300  |
| C  | 4.09689900 | -4.11944000 | -0.28611400 |
| H  | 5.01823100 | -2.88699900 | -1.79596700 |
| C  | 4.09499300 | -3.20866000 | 1.95155300  |
| H  | 4.94746600 | -1.22782400 | 2.15249300  |
| C  | 3.77471200 | -4.24284400 | 1.06837800  |
| H  | 3.84259500 | -4.91623800 | -0.98171300 |
| H  | 3.82639500 | -3.28897300 | 3.00244100  |
| H  | 3.26337900 | -5.13254800 | 1.42960900  |
| H  | 6.19025700 | -0.04469700 | 0.35712100  |
| H  | 5.79212900 | -0.50463700 | -1.39834100 |
| Br | 8.08736900 | -1.66286000 | -0.71648400 |

## TSb2

-2 1

|   | x           | y           | z           |
|---|-------------|-------------|-------------|
| C | -0.81316200 | 1.07179100  | -1.39318900 |
| C | -0.94162500 | -0.34958100 | -1.39250400 |
| C | -1.15021700 | -1.10402400 | -0.22573000 |
| C | -1.10138200 | -0.39605500 | 1.06000500  |
| C | 0.17883600  | 1.40337100  | -2.35174300 |
| C | 0.60102500  | 0.18407200  | -3.05602300 |
| C | -0.10784900 | -0.91437700 | -2.45377500 |
| C | 0.50840500  | -2.15667400 | -2.29975600 |
| C | -0.47857000 | -2.35758200 | -0.05872500 |
| C | -0.42688800 | -1.25476200 | 2.01559100  |
| C | 0.40145200  | -0.71211200 | 3.00681400  |
| C | 0.59835300  | 0.71413500  | 3.05032200  |
| C | -0.04145200 | 1.51893700  | 2.09307900  |

|   |             |             |             |
|---|-------------|-------------|-------------|
| C | 0.69068300  | 2.61528900  | 1.48032000  |
| C | 0.24510400  | 2.75484800  | 0.12562300  |
| C | 1.16493800  | 3.07977200  | -0.85694600 |
| C | 1.12958500  | 2.43831900  | -2.17363400 |
| C | 1.91499900  | 0.02148900  | -3.49084800 |
| C | 2.89854600  | 1.06623200  | -3.26060700 |
| C | 2.48960500  | 2.23228400  | -2.57781400 |
| C | 3.37578300  | 2.79881900  | -1.55969000 |
| C | 2.55072800  | 3.32644500  | -0.50074800 |
| C | 2.96944400  | 3.24295300  | 0.83370800  |
| C | 2.01547100  | 2.88798400  | 1.85373000  |
| C | 2.68237800  | 2.02913400  | 2.82263000  |
| C | 1.99116100  | 0.96736400  | 3.40278000  |
| C | -0.03747500 | -2.46548200 | 1.32985500  |
| C | 4.36029100  | -1.70774300 | 2.46411300  |
| C | 3.41079800  | -2.70818600 | 2.22609000  |
| C | 3.38092000  | -3.39193300 | 0.93924600  |
| C | 4.30976800  | -3.05346700 | -0.04889700 |
| C | 5.28677300  | -2.00882800 | 0.19917600  |
| C | 5.52087900  | 0.08304700  | 1.48189400  |
| C | 4.68987600  | 0.61799300  | 2.54738800  |
| C | 3.97091000  | -0.49016500 | 3.15530100  |
| C | 2.64803600  | -0.31695600 | 3.57470800  |
| C | 1.66076500  | -1.35760200 | 3.33000300  |
| C | 2.03944100  | -2.52440900 | 2.65828700  |
| C | 1.99690000  | -3.65605100 | 0.59122400  |
| C | 1.58037600  | -3.53673800 | -0.74403600 |
| C | 2.54893200  | -3.18698600 | -1.77537500 |
| C | 3.88133200  | -2.94850600 | -1.43639400 |
| C | 4.59835500  | -1.83885600 | -2.04359200 |
| C | 5.47120600  | -1.26133900 | -1.03165000 |
| C | 5.65923600  | 0.12311500  | -0.98919100 |
| C | 5.69158200  | 0.80889300  | 0.29752000  |
| C | 4.05666700  | 1.85366000  | 2.38613500  |
| C | 4.23391200  | 2.60855400  | 1.15435900  |
| C | 5.03063500  | 2.08777900  | 0.12910300  |
| C | 4.59968200  | 2.19153100  | -1.25963500 |
| C | 5.00885400  | 0.98739900  | -1.95569000 |
| C | 4.14725400  | 0.43186500  | -2.91898200 |
| C | 3.95365600  | -1.01234900 | -2.96549000 |
| C | 2.56964800  | -1.26700800 | -3.32623800 |
| C | 1.88091100  | -2.33254500 | -2.74249700 |
| C | 1.16691800  | -3.10090500 | 1.64411000  |
| C | 0.32297900  | -2.91278300 | -1.07786000 |

|    |             |             |             |
|----|-------------|-------------|-------------|
| C  | 5.32570100  | -1.35537200 | 1.43863800  |
| C  | -3.15780200 | 5.13144500  | 0.09607400  |
| C  | -2.12974300 | 4.19402800  | 0.17989100  |
| C  | -2.29463900 | 2.84676100  | -0.18083700 |
| C  | -3.57413000 | 2.45896100  | -0.64377000 |
| C  | -4.58345900 | 3.42562600  | -0.75916800 |
| C  | -4.41250700 | 4.76001400  | -0.38681000 |
| C  | -1.04103700 | 1.91512500  | -0.12765600 |
| C  | -4.06129100 | 1.04842900  | -0.99388400 |
| C  | -0.95888400 | 0.98001600  | 1.12438000  |
| O  | -3.84888800 | 0.18127300  | -0.07402500 |
| O  | -4.71537100 | 0.90142800  | -2.03984000 |
| C  | -5.54990200 | 5.75078200  | -0.49070800 |
| H  | -5.18098700 | 6.78326700  | -0.52414100 |
| H  | -6.15021400 | 5.57728500  | -1.39192500 |
| H  | -6.23331600 | 5.67639100  | 0.36742900  |
| H  | -5.53609200 | 3.09439800  | -1.16354500 |
| H  | -2.96743800 | 6.16282600  | 0.39142200  |
| H  | -1.15764000 | 4.53304500  | 0.52046700  |
| C  | -5.00992000 | -1.53368500 | -0.34824100 |
| H  | -4.17240000 | -2.07426000 | 0.05576500  |
| H  | -5.02623600 | -1.30581700 | -1.39912300 |
| C  | -6.08351200 | -1.04873600 | 0.52971200  |
| C  | -7.10776100 | -0.23736900 | 0.01447900  |
| C  | -6.09005300 | -1.35283000 | 1.89955200  |
| C  | -8.11282500 | 0.24788900  | 0.84816800  |
| H  | -7.08169200 | 0.02499800  | -1.03827600 |
| C  | -7.09548100 | -0.86738200 | 2.73185900  |
| H  | -5.30142000 | -1.98205400 | 2.30257600  |
| C  | -8.11475900 | -0.06577800 | 2.21014900  |
| H  | -8.89733700 | 0.87884700  | 0.43442000  |
| H  | -7.08399900 | -1.11343200 | 3.79193300  |
| H  | -8.90025800 | 0.31497200  | 2.86039900  |
| Br | -6.03991600 | -3.77023000 | -0.87036000 |

**TSb3-1**

-2 1

|   | x           | y           | z          |
|---|-------------|-------------|------------|
| C | -0.69533000 | -0.99600800 | 1.64773700 |
| C | -0.90581700 | 0.52589100  | 1.36543700 |
| C | -2.25009800 | 1.01571800  | 1.99246800 |
| C | -3.55569800 | 0.72911400  | 1.52015900 |
| C | 0.30718800  | 1.27883400  | 1.92099500 |
| C | 1.06931100  | 2.17268000  | 1.17380500 |

|   |             |             |             |
|---|-------------|-------------|-------------|
| C | 0.86452700  | 2.43749700  | -0.23441300 |
| C | -0.00118900 | 1.42052100  | -0.88994700 |
| C | 1.15451300  | 0.72910800  | 2.95614300  |
| C | 2.45888300  | 1.37146000  | 2.88740400  |
| C | 2.41085300  | 2.27534900  | 1.76644100  |
| C | 3.52622800  | 2.45038800  | 0.96149600  |
| C | 2.09035100  | 2.46381600  | -1.04325100 |
| C | 0.60977000  | 1.02727000  | -2.14053600 |
| C | 0.42850200  | -0.25587800 | -2.66743400 |
| C | -0.33680700 | -1.21419100 | -1.91372700 |
| C | -0.87398200 | -0.83140300 | -0.67926500 |
| C | -0.84352700 | -1.75475200 | 0.43943400  |
| C | 0.12753800  | -1.48525600 | 2.64771700  |
| C | 1.06308200  | -0.60005300 | 3.36591400  |
| C | 3.62203100  | 0.65394800  | 3.17227400  |
| C | 3.53375800  | -0.74147300 | 3.55365600  |
| C | 2.26840900  | -1.34950000 | 3.62629300  |
| C | 2.08892800  | -2.69527000 | 3.09965400  |
| C | 0.77150900  | -2.77390600 | 2.50100000  |
| C | 0.57220100  | -3.54114400 | 1.34630800  |
| C | -0.25913400 | -3.02131700 | 0.29086500  |
| C | 0.33192700  | -3.40276700 | -0.98274700 |
| C | 0.29642500  | -2.51532300 | -2.05739700 |
| C | 1.89834100  | 1.67533400  | -2.24193100 |
| C | 3.92378700  | -2.42889600 | -2.73814100 |
| C | 4.00320100  | -1.08015900 | -3.09923700 |
| C | 4.92877600  | -0.19401100 | -2.40548100 |
| C | 5.73982800  | -0.69618400 | -1.38504300 |
| C | 5.65150800  | -2.09523400 | -1.00765800 |
| C | 3.98758800  | -3.91403700 | -0.91735800 |
| C | 2.66762200  | -3.99881200 | -1.51774300 |
| C | 2.62785100  | -3.07851500 | -2.64244100 |
| C | 1.46342400  | -2.35208500 | -2.90638900 |
| C | 1.54633600  | -0.94879900 | -3.28057600 |
| C | 2.79472900  | -0.32717700 | -3.37405900 |
| C | 4.29666800  | 1.10559100  | -2.27023800 |
| C | 4.47666000  | 1.84928400  | -1.09476500 |
| C | 5.32597000  | 1.32718700  | -0.03220400 |
| C | 5.94308500  | 0.08295200  | -0.17338400 |
| C | 5.98738200  | -0.83714600 | 0.95184400  |
| C | 5.80627900  | -2.18503700 | 0.43385200  |
| C | 5.05730800  | -3.11373200 | 1.16057400  |
| C | 4.13158300  | -3.99819200 | 0.47197600  |
| C | 1.54054800  | -4.15580200 | -0.70586700 |

|    |             |             |             |
|----|-------------|-------------|-------------|
| C  | 1.68963600  | -4.24147900 | 0.74012800  |
| C  | 2.96060400  | -4.15953300 | 1.31380400  |
| C  | 3.16478100  | -3.37624400 | 2.52331700  |
| C  | 4.46677100  | -2.74004000 | 2.43594500  |
| C  | 4.63857000  | -1.44392100 | 2.93225200  |
| C  | 5.42122200  | -0.47561600 | 2.17511700  |
| C  | 4.78920200  | 0.82339000  | 2.32558500  |
| C  | 4.74132300  | 1.70653100  | 1.24203400  |
| C  | 2.97564100  | 1.01887400  | -2.85273000 |
| C  | 3.37199100  | 2.55381900  | -0.48963000 |
| C  | 4.76476900  | -2.94884600 | -1.67377900 |
| C  | -3.28125300 | 2.03700800  | 3.97175600  |
| C  | -2.16138100 | 1.67576600  | 3.22643900  |
| C  | -4.67283700 | 1.06684300  | 2.30103400  |
| C  | -4.56596200 | 1.72943800  | 3.52510200  |
| C  | -3.91429600 | 0.19039500  | 0.15873800  |
| C  | -0.76821100 | 0.51371400  | -0.18232400 |
| O  | -4.85924400 | -0.75092500 | 0.25914400  |
| O  | -3.47007400 | 0.63253600  | -0.88779000 |
| C  | -5.79871300 | 2.11546300  | 4.30762700  |
| H  | -6.21303800 | 3.06836500  | 3.95149300  |
| H  | -6.58754900 | 1.36275000  | 4.20466500  |
| H  | -5.57364200 | 2.23458800  | 5.37366000  |
| H  | -5.65549100 | 0.80322400  | 1.92187900  |
| H  | -3.14386300 | 2.55780900  | 4.91757200  |
| H  | -1.18034300 | 1.91355500  | 3.61992000  |
| C  | -5.57864300 | -1.17987100 | -0.94897000 |
| C  | -5.20623600 | -2.59728700 | -1.30702700 |
| C  | -6.12422700 | -3.63259200 | -1.08400600 |
| C  | -3.95431000 | -2.89182700 | -1.86550600 |
| C  | -5.78033500 | -4.94655200 | -1.41363900 |
| H  | -7.10580300 | -3.38628100 | -0.67143300 |
| C  | -3.61237300 | -4.20582500 | -2.18451500 |
| H  | -3.24876700 | -2.08528900 | -2.04868000 |
| C  | -4.52749500 | -5.23784100 | -1.95687000 |
| H  | -6.49830900 | -5.74589400 | -1.24116100 |
| H  | -2.63345600 | -4.42196800 | -2.60667800 |
| H  | -4.26292900 | -6.26425900 | -2.20567900 |
| H  | -5.32456400 | -0.48027700 | -1.74793400 |
| H  | -6.64078100 | -1.11067000 | -0.68229400 |
| Br | -9.16614100 | -1.77726900 | 0.01728200  |
| C  | -1.79161000 | 3.88157900  | -2.05255900 |
| C  | -2.25604200 | 3.88066900  | -3.36554800 |
| C  | -1.49985400 | 4.47171400  | -4.38046200 |



|    |             |            |             |
|----|-------------|------------|-------------|
| C  | -0.26827500 | 5.05887500 | -4.07350700 |
| C  | 0.19957200  | 5.05796600 | -2.76326300 |
| C  | -0.55872900 | 4.47846300 | -1.72930100 |
| H  | -2.37670500 | 3.39666700 | -1.27652000 |
| H  | -3.20745800 | 3.40815800 | -3.59430500 |
| H  | -1.86402100 | 4.46937100 | -5.40529500 |
| H  | 0.32687100  | 5.52004600 | -4.85855800 |
| H  | 1.14658700  | 5.53146800 | -2.51938000 |
| C  | -0.05562400 | 4.45545700 | -0.36024400 |
| H  | -0.71465700 | 4.20508000 | 0.45524300  |
| H  | 0.88821800  | 4.91011000 | -0.11474200 |
| Br | -0.73039400 | 6.95356400 | 0.36769400  |

**TSb3-2**

-2 1

|   | x           | y           | z           |
|---|-------------|-------------|-------------|
| C | 0.25094600  | 0.55185600  | 2.30722300  |
| C | -0.78720300 | 0.66009500  | 1.15178400  |
| C | -2.16106200 | 1.06041000  | 1.76616700  |
| C | -3.43608400 | 0.62851900  | 1.33574500  |
| C | -0.27322500 | 1.66960700  | 0.04783000  |
| C | -0.00673900 | 1.16140400  | -1.29740800 |
| C | -0.23466300 | -0.14870800 | -1.70776900 |
| C | -0.54894800 | -1.15632500 | -0.68247500 |
| C | 0.90019400  | 2.48934200  | 0.34283000  |
| C | 1.66405100  | 2.72658100  | -0.87027000 |
| C | 1.09800200  | 1.88922800  | -1.89684600 |
| C | 1.91977300  | 1.30848000  | -2.86762800 |
| C | 0.63404400  | -0.76750700 | -2.67331900 |
| C | 0.10847700  | -2.38926900 | -1.05611000 |
| C | 0.62501800  | -3.24810400 | -0.07961200 |
| C | 0.51815100  | -2.87181700 | 1.30676400  |
| C | -0.10328000 | -1.65854900 | 1.63959200  |
| C | 0.47608100  | -0.81753100 | 2.66983800  |
| C | 1.24052900  | 1.48017500  | 2.55690100  |
| C | 1.56809900  | 2.52160500  | 1.56796900  |
| C | 3.04209900  | 2.96562600  | -0.82940900 |
| C | 3.73362100  | 2.96638900  | 0.43921300  |
| C | 2.99332200  | 2.71900800  | 1.60934800  |
| C | 3.55120700  | 1.84510500  | 2.63363500  |
| C | 2.46509200  | 1.08833400  | 3.21927600  |
| C | 2.66406400  | -0.23865900 | 3.61788200  |
| C | 1.64258900  | -1.21658700 | 3.33795600  |
| C | 2.29691000  | -2.46401400 | 2.97257900  |

|   |             |             |             |
|---|-------------|-------------|-------------|
| C | 1.74789300  | -3.26978100 | 1.97698000  |
| C | 0.84279100  | -2.15421600 | -2.28145100 |
| C | 4.73200900  | -3.44576500 | -0.19332600 |
| C | 4.05987700  | -3.43011300 | -1.41939400 |
| C | 4.39269000  | -2.42473100 | -2.41974500 |
| C | 5.38806500  | -1.48027500 | -2.15448100 |
| C | 6.07804200  | -1.49312400 | -0.87593200 |
| C | 5.65569900  | -2.08181600 | 1.48306100  |
| C | 4.56579200  | -2.84082900 | 2.07213600  |
| C | 3.99406600  | -3.68416700 | 1.03505100  |
| C | 2.61276500  | -3.89489000 | 0.99007400  |
| C | 1.91476100  | -3.88153100 | -0.28506400 |
| C | 2.62730300  | -3.64647100 | -1.46469900 |
| C | 3.16913100  | -2.03059000 | -3.09164300 |
| C | 2.97439900  | -0.69452800 | -3.46171600 |
| C | 4.01088300  | 0.29020000  | -3.18498700 |
| C | 5.19063000  | -0.09400400 | -2.54455200 |
| C | 5.76233400  | 0.75032900  | -1.50722200 |
| C | 6.31154000  | -0.11538200 | -0.47716700 |
| C | 6.20417500  | 0.24975800  | 0.86740700  |
| C | 5.87216100  | -0.75526600 | 1.86883600  |
| C | 3.73241900  | -2.24335300 | 3.02171600  |
| C | 3.95875400  | -0.86405600 | 3.42383600  |
| C | 5.00674500  | -0.13499000 | 2.85237400  |
| C | 4.80370300  | 1.25165500  | 2.45823400  |
| C | 5.55554900  | 1.49262900  | 1.23883900  |
| C | 5.01735800  | 2.32404700  | 0.24846200  |
| C | 5.13005000  | 1.94436500  | -1.15311200 |
| C | 3.90445300  | 2.34530800  | -1.82257500 |
| C | 3.35500100  | 1.53390300  | -2.81695500 |
| C | 2.07529100  | -2.77534700 | -2.49183200 |
| C | 1.68729600  | -0.05690100 | -3.27506900 |
| C | 5.76301800  | -2.45988600 | 0.08417800  |
| C | -3.28632800 | 2.52388100  | 3.37613500  |
| C | -2.13208600 | 1.98203100  | 2.82430900  |
| C | -4.59401400 | 1.14136200  | 1.94602800  |
| C | -4.54733100 | 2.12733500  | 2.92941100  |
| C | -3.70639000 | -0.21283200 | 0.12080900  |
| C | -0.70301500 | -0.80889100 | 0.64477100  |
| O | -4.62728200 | -1.15048500 | 0.38056500  |
| O | -3.20988900 | 0.00202700  | -0.97316000 |
| C | -5.79727300 | 2.82191500  | 3.40331800  |
| H | -5.90196800 | 3.75936900  | 2.84059200  |
| H | -6.69205400 | 2.21526100  | 3.23000200  |

|    |             |             |             |
|----|-------------|-------------|-------------|
| H  | -5.74759200 | 3.07299700  | 4.46989500  |
| H  | -5.55652500 | 0.79114800  | 1.58650700  |
| H  | -3.19974100 | 3.28979500  | 4.14327600  |
| H  | -1.17452500 | 2.32287400  | 3.20036500  |
| C  | -5.22150100 | -1.90586000 | -0.72890700 |
| C  | -4.82913600 | -3.36205400 | -0.63899300 |
| C  | -5.81702100 | -4.34170300 | -0.47175200 |
| C  | -3.48580800 | -3.75006600 | -0.74039800 |
| C  | -5.45333100 | -5.69001100 | -0.40506200 |
| H  | -6.86431800 | -4.03487700 | -0.41019000 |
| C  | -3.12685500 | -5.09497700 | -0.66373200 |
| H  | -2.71900800 | -2.99395300 | -0.88243300 |
| C  | -4.11348300 | -6.07093600 | -0.49502900 |
| H  | -6.22727200 | -6.44429100 | -0.27727200 |
| H  | -2.07878500 | -5.37726800 | -0.73765600 |
| H  | -3.83594600 | -7.12222900 | -0.43671900 |
| H  | -4.87499200 | -1.45042000 | -1.65931800 |
| H  | -6.30698200 | -1.78878900 | -0.62621000 |
| Br | -9.01764400 | -2.48557100 | -0.58293600 |
| C  | -2.24408900 | 3.18854100  | -2.64387600 |
| C  | -2.05555900 | 3.63790400  | -3.94726800 |
| C  | -1.23222700 | 4.73938000  | -4.20128200 |
| C  | -0.59570100 | 5.38830900  | -3.14013200 |
| C  | -0.78102900 | 4.94055400  | -1.83468800 |
| C  | -1.61386000 | 3.83899500  | -1.56469500 |
| H  | -2.87318000 | 2.32606800  | -2.44189400 |
| H  | -2.55129100 | 3.12693600  | -4.76906500 |
| H  | -1.08727500 | 5.08916700  | -5.22107300 |
| H  | 0.04403100  | 6.24703500  | -3.33082200 |
| H  | -0.30686100 | 5.45806400  | -1.00573100 |
| C  | -1.80706900 | 3.35297600  | -0.20870100 |
| H  | -2.60488000 | 2.66048100  | -0.00743800 |
| H  | -1.38111700 | 3.87809800  | 0.62796200  |
| Br | -3.72892600 | 5.15922300  | 0.62621400  |

### TSb3

-2 1

|   | x           | y          | z           |
|---|-------------|------------|-------------|
| C | -0.05862000 | 1.00033900 | -1.55184600 |
| C | 0.99613600  | 0.86590700 | -0.41291400 |
| C | 2.15475600  | 1.89235700 | -0.62755600 |
| C | 3.51987700  | 1.73354600 | -0.29069600 |
| C | 0.25258100  | 1.05303300 | 0.91938400  |
| C | 0.33224800  | 0.07894400 | 1.98981500  |

|   |             |             |             |
|---|-------------|-------------|-------------|
| C | 0.90837800  | -1.17347600 | 1.80799100  |
| C | 1.38028800  | -1.54192900 | 0.46299600  |
| C | -0.97938100 | 1.69879700  | 1.02138900  |
| C | -1.68358500 | 1.20628700  | 2.21734900  |
| C | -0.85319400 | 0.19692900  | 2.82499300  |
| C | -1.42861000 | -0.92960300 | 3.41941100  |
| C | 0.30328800  | -2.33997600 | 2.39801300  |
| C | 1.07597900  | -2.94094300 | 0.26057400  |
| C | 0.70294400  | -3.41220000 | -1.00347800 |
| C | 0.60125700  | -2.47843400 | -2.09541100 |
| C | 0.88047500  | -1.12193900 | -1.86604100 |
| C | 0.02743700  | -0.10584100 | -2.45874700 |
| C | -1.26294400 | 1.66455200  | -1.41035800 |
| C | -1.74202700 | 2.19301100  | -0.10844600 |
| C | -3.06412100 | 1.07252700  | 2.22640400  |
| C | -3.84596200 | 1.43097400  | 1.04095400  |
| C | -3.17552900 | 1.89610500  | -0.09382100 |
| C | -3.58876100 | 1.41392700  | -1.39781900 |
| C | -2.40067700 | 1.27029600  | -2.20885600 |
| C | -2.30109400 | 0.23163300  | -3.14131400 |
| C | -1.05372500 | -0.47550100 | -3.27262300 |
| C | -1.35307700 | -1.88315900 | -3.48479600 |
| C | -0.54515100 | -2.86203000 | -2.90885600 |
| C | 0.40933700  | -3.43724600 | 1.44719800  |
| C | -3.21022700 | -4.68165400 | -1.11222700 |
| C | -2.46477500 | -5.00844500 | 0.02639800  |
| C | -2.94857800 | -4.63171800 | 1.34455700  |
| C | -4.15905500 | -3.94636500 | 1.47372000  |
| C | -4.92762400 | -3.60123000 | 0.29094500  |
| C | -4.57201300 | -3.03025000 | -2.08236200 |
| C | -3.38088400 | -3.16881700 | -2.90258600 |
| C | -2.53844300 | -4.18981100 | -2.30282300 |
| C | -1.14865800 | -4.03681000 | -2.30757800 |
| C | -0.37314100 | -4.37894500 | -1.12466000 |
| C | -1.02247700 | -4.84909800 | 0.01945100  |
| C | -1.80531000 | -4.25605200 | 2.16037000  |
| C | -1.91313100 | -3.19763600 | 3.06815300  |
| C | -3.17571600 | -2.48407900 | 3.20449800  |
| C | -4.27242000 | -2.84852100 | 2.42175900  |
| C | -5.11035000 | -1.82423800 | 1.81893900  |
| C | -5.52064800 | -2.29305500 | 0.50379600  |
| C | -5.61931200 | -1.38897800 | -0.55650400 |
| C | -5.13762300 | -1.76775200 | -1.87896600 |
| C | -2.79773600 | -2.03836600 | -3.48196600 |

|    |             |             |             |
|----|-------------|-------------|-------------|
| C  | -3.38519400 | -0.72565500 | -3.26810400 |
| C  | -4.53229100 | -0.59493700 | -2.47980700 |
| C  | -4.64500000 | 0.50325800  | -1.53010500 |
| C  | -5.32865300 | 0.01795000  | -0.35231700 |
| C  | -4.91066200 | 0.46723800  | 0.91092500  |
| C  | -4.81185000 | -0.47515600 | 2.01740600  |
| C  | -3.67362200 | -0.09471300 | 2.83607000  |
| C  | -2.87169200 | -1.07987100 | 3.42156200  |
| C  | -0.61611600 | -4.37810800 | 1.33573300  |
| C  | -0.83874300 | -2.23516300 | 3.20884000  |
| C  | -4.46849800 | -3.96979600 | -0.97908100 |
| C  | 2.69966900  | 4.14714900  | -1.44881900 |
| C  | 1.79703100  | 3.11412700  | -1.22114100 |
| C  | 4.43653500  | 2.75998800  | -0.58782300 |
| C  | 4.05395700  | 3.97757900  | -1.14868700 |
| C  | 4.08886200  | 0.58922100  | 0.49756900  |
| C  | 1.34101800  | -0.64377500 | -0.58951300 |
| O  | 5.31765700  | 0.26447800  | 0.06447500  |
| O  | 3.53171400  | 0.07997900  | 1.45397700  |
| C  | 5.06294600  | 5.06848300  | -1.42066600 |
| H  | 4.73367900  | 6.02681200  | -1.00074900 |
| H  | 6.03982800  | 4.82457700  | -0.99132500 |
| H  | 5.20275600  | 5.22265300  | -2.49894000 |
| H  | 5.47914500  | 2.59062600  | -0.33946600 |
| H  | 2.31876700  | 5.08493800  | -1.84802900 |
| H  | 0.77276200  | 3.27709800  | -1.52768800 |
| C  | 6.13232200  | -0.65535200 | 0.86509900  |
| C  | 6.25423800  | -1.99416900 | 0.17578700  |
| C  | 7.51411900  | -2.45835000 | -0.22551000 |
| C  | 5.12210800  | -2.78982500 | -0.05178300 |
| C  | 7.62799500  | -3.70416200 | -0.84975400 |
| H  | 8.39411900  | -1.84111000 | -0.02730600 |
| C  | 5.23993800  | -4.02742300 | -0.68298200 |
| H  | 4.14670600  | -2.43633300 | 0.27095000  |
| C  | 6.49721600  | -4.48820100 | -1.08485100 |
| H  | 8.61016600  | -4.05862400 | -1.15634600 |
| H  | 4.35098800  | -4.63005300 | -0.85726200 |
| H  | 6.59199200  | -5.45526600 | -1.57618800 |
| H  | 5.65497400  | -0.75031000 | 1.84313600  |
| H  | 7.11379300  | -0.17622600 | 0.96286100  |
| Br | 9.86255700  | 0.12266300  | 1.06641700  |
| C  | -1.90751700 | 5.19964900  | 2.03331900  |
| C  | -2.75467100 | 5.70559800  | 3.01480900  |
| C  | -4.07749800 | 6.03210100  | 2.70295600  |

|    |             |            |             |
|----|-------------|------------|-------------|
| C  | -4.54598600 | 5.84541200 | 1.39926800  |
| C  | -3.70091300 | 5.33724400 | 0.41771900  |
| C  | -2.36520100 | 5.00980300 | 0.71614800  |
| H  | -0.87805900 | 4.95026000 | 2.27470200  |
| H  | -2.38251100 | 5.84635300 | 4.02669400  |
| H  | -4.73873700 | 6.42769400 | 3.47039200  |
| H  | -5.57404200 | 6.09648600 | 1.14861700  |
| H  | -4.06354500 | 5.19815900 | -0.59710200 |
| C  | -1.48319800 | 4.46115000 | -0.30297300 |
| H  | -0.44360700 | 4.29724300 | -0.08410100 |
| H  | -1.81622900 | 4.36142700 | -1.32154000 |
| Br | -0.45324800 | 6.66047300 | -1.35240300 |

**TSb4-1**

-2 1

|   | x           | y           | z           |
|---|-------------|-------------|-------------|
| C | -0.32742900 | 2.68886700  | 0.55707800  |
| C | -1.49256700 | 1.95099700  | -0.16963700 |
| C | -2.66795600 | 2.92449900  | -0.31810300 |
| C | -3.73223700 | 2.95595000  | 0.58833000  |
| C | -0.95275100 | 1.50284800  | -1.52753000 |
| C | -0.97094600 | 0.14121800  | -1.97044300 |
| C | -1.27957700 | -0.91297100 | -1.10677400 |
| C | -1.71210500 | -0.71137500 | 0.27675700  |
| C | 0.13495400  | 2.14067600  | -2.16111600 |
| C | 0.76061200  | 1.20017100  | -3.09631400 |
| C | 0.05421000  | -0.04986600 | -2.98566100 |
| C | 0.74470000  | -1.26507000 | -3.10842100 |
| C | -0.55384300 | -2.14911900 | -1.22352200 |
| C | -0.98119500 | -1.72457400 | 1.03330300  |
| C | -0.37333000 | -1.50071200 | 2.27451400  |
| C | -0.27433100 | -0.11416100 | 2.73770300  |
| C | -0.81102000 | 0.91851300  | 1.99281000  |
| C | -0.08957400 | 2.14258600  | 1.85339700  |
| C | 0.71323600  | 3.32752400  | -0.10537900 |
| C | 0.95084700  | 3.12375000  | -1.53202700 |
| C | 2.13585500  | 1.22039400  | -3.32292700 |
| C | 2.97842400  | 2.18426700  | -2.63172800 |
| C | 2.36822600  | 3.08588200  | -1.72711100 |
| C | 3.02781300  | 3.34374400  | -0.44575800 |
| C | 1.99791700  | 3.49972800  | 0.55505900  |
| C | 2.20014800  | 3.03404200  | 1.85823300  |
| C | 1.12781700  | 2.35229000  | 2.53802800  |
| C | 1.69013500  | 1.27078800  | 3.30981800  |

|   |             |             |             |
|---|-------------|-------------|-------------|
| C | 1.00201300  | 0.05784100  | 3.40456500  |
| C | -0.35303800 | -2.65363100 | 0.11753900  |
| C | 3.70966200  | -2.14583600 | 2.19984800  |
| C | 2.89606700  | -3.05986800 | 1.51346200  |
| C | 3.14324800  | -3.32211300 | 0.10013100  |
| C | 4.18648900  | -2.66864800 | -0.56160100 |
| C | 5.01932700  | -1.71662500 | 0.15225400  |
| C | 4.85495200  | -0.10002800 | 2.00787400  |
| C | 3.81881100  | 0.06455700  | 3.00846800  |
| C | 3.10224500  | -1.19956300 | 3.12076500  |
| C | 1.71783900  | -1.19762200 | 3.31041200  |
| C | 0.86733200  | -2.15182300 | 2.60589900  |
| C | 1.46471000  | -3.07157800 | 1.72351700  |
| C | 1.86222300  | -3.50943200 | -0.55781800 |
| C | 1.66575500  | -3.01423000 | -1.85293200 |
| C | 2.75345700  | -2.33793700 | -2.54621100 |
| C | 3.98513200  | -2.16605000 | -1.91334400 |
| C | 4.69330300  | -0.90053000 | -2.02764200 |
| C | 5.33685800  | -0.62762100 | -0.75110500 |
| C | 5.40073000  | 0.68802700  | -0.27603400 |
| C | 5.15857600  | 0.95364700  | 1.13675500  |
| C | 3.12798500  | 1.27609700  | 3.10892800  |
| C | 3.44448600  | 2.37198200  | 2.20559300  |
| C | 4.43626600  | 2.20578100  | 1.23345400  |
| C | 4.23092400  | 2.70980500  | -0.11938500 |
| C | 4.84595200  | 1.78024100  | -1.04897900 |
| C | 4.20085700  | 1.51615500  | -2.27140200 |
| C | 4.13765200  | 0.14390100  | -2.76924600 |
| C | 2.86111700  | -0.03512300 | -3.43487200 |
| C | 2.17721400  | -1.25151700 | -3.32387500 |
| C | 0.82818200  | -3.32670200 | 0.44837200  |
| C | 0.43202300  | -2.34910200 | -2.20995500 |
| C | 4.78950000  | -1.46736500 | 1.51301400  |
| C | -3.65106700 | 4.85345500  | -1.42886300 |
| C | -2.65314900 | 3.89110800  | -1.33740200 |
| C | -4.73807100 | 3.93073400  | 0.48937200  |
| C | -4.71674100 | 4.89277100  | -0.51383100 |
| C | -3.88889200 | 1.92389700  | 1.64279400  |
| C | -1.81628300 | 0.71585400  | 0.85667000  |
| O | -3.13754300 | 0.81306700  | 1.52902900  |
| O | -4.71747400 | 1.99661000  | 2.53104300  |
| C | -5.80895400 | 5.93076600  | -0.63536700 |
| H | -6.48414000 | 5.89748200  | 0.22624000  |
| H | -5.39653100 | 6.94647700  | -0.70070700 |

|    |             |             |             |
|----|-------------|-------------|-------------|
| H  | -6.41706900 | 5.77307100  | -1.53665300 |
| H  | -5.54368600 | 3.89449200  | 1.21647400  |
| H  | -3.60491200 | 5.59138900  | -2.22904500 |
| H  | -1.84320800 | 3.88194300  | -2.05832300 |
| C  | -3.53874800 | -3.55786900 | -1.34743800 |
| C  | -3.34554900 | -4.93121300 | -1.47692200 |
| C  | -3.32365200 | -5.74890800 | -0.34526300 |
| C  | -3.49561600 | -5.17904500 | 0.92076700  |
| C  | -3.68882500 | -3.80830800 | 1.05114400  |
| C  | -3.72142400 | -2.97097200 | -0.08114500 |
| H  | -3.56967800 | -2.92462600 | -2.22859200 |
| H  | -3.20820000 | -5.36438800 | -2.46523300 |
| H  | -3.16973000 | -6.82119700 | -0.44681500 |
| H  | -3.47562700 | -5.80782500 | 1.80836400  |
| H  | -3.82497100 | -3.36587200 | 2.03401800  |
| C  | -3.92551600 | -1.54035100 | 0.06063900  |
| H  | -4.16538900 | -1.10779800 | 1.01556700  |
| H  | -4.01349900 | -0.91313900 | -0.80944000 |
| Br | -6.61004500 | -1.57213700 | -0.27918700 |

**TSb4-2**

-2 1

|   | x           | y           | z           |
|---|-------------|-------------|-------------|
| C | 1.23193600  | 1.05289700  | 1.07786400  |
| C | 1.35518700  | 2.04957300  | -0.11374600 |
| C | 2.75673900  | 2.67424100  | -0.11793800 |
| C | 3.01434800  | 3.95935500  | 0.37251100  |
| C | 1.09820100  | 1.23287500  | -1.38362800 |
| C | 0.12311900  | 1.60078100  | -2.37575100 |
| C | -0.86194700 | 2.55320800  | -2.07033200 |
| C | -0.90598500 | 3.23208000  | -0.81634900 |
| C | 1.32556200  | -0.14849900 | -1.46971600 |
| C | 0.50623300  | -0.68311000 | -2.55557100 |
| C | -0.24035300 | 0.41856100  | -3.12601300 |
| C | -1.54976100 | 0.21382400  | -3.59008500 |
| C | -2.22394400 | 2.34776600  | -2.55637400 |
| C | -2.27359900 | 3.36309600  | -0.44991700 |
| C | -2.73304800 | 3.24294600  | 0.88321500  |
| C | -1.75207200 | 2.82525300  | 1.87450100  |
| C | -0.41404400 | 2.65083100  | 1.53719200  |
| C | 0.30098600  | 1.52646400  | 2.05464800  |
| C | 1.46357600  | -0.31107400 | 0.96922300  |
| C | 1.63814800  | -0.98186200 | -0.33018200 |
| C | -0.07201900 | -1.94552100 | -2.46434400 |



|   |             |             |             |
|---|-------------|-------------|-------------|
| C | 0.13941300  | -2.76064800 | -1.26340600 |
| C | 0.91908200  | -2.24273600 | -0.22250300 |
| C | 0.47309100  | -2.42847700 | 1.14657300  |
| C | 0.81111500  | -1.23091700 | 1.88312900  |
| C | -0.03560600 | -0.76053200 | 2.89151000  |
| C | -0.28852500 | 0.65359700  | 2.99704500  |
| C | -1.67420100 | 0.84049100  | 3.35283600  |
| C | -2.39474800 | 1.90158600  | 2.79632800  |
| C | -3.10885600 | 2.84622700  | -1.53147700 |
| C | -5.17966100 | -0.06684900 | 1.38260500  |
| C | -5.35477400 | 0.71024100  | 0.22492100  |
| C | -5.30074500 | 0.07508600  | -1.08465900 |
| C | -5.05659200 | -1.29538100 | -1.19133100 |
| C | -4.85788400 | -2.09645400 | 0.00607500  |
| C | -3.94958400 | -1.86118100 | 2.28760800  |
| C | -3.60322600 | -0.66308000 | 3.02808100  |
| C | -4.35550200 | 0.44792200  | 2.46073200  |
| C | -3.75402000 | 1.70567600  | 2.34976300  |
| C | -3.94681900 | 2.52092200  | 1.14978200  |
| C | -4.75840900 | 2.02231400  | 0.11221100  |
| C | -4.66672100 | 1.00048000  | -2.01130300 |
| C | -3.80670700 | 0.51625500  | -3.00305100 |
| C | -3.55168300 | -0.91274000 | -3.11215300 |
| C | -4.16532000 | -1.79917500 | -2.22607700 |
| C | -3.40748200 | -2.90502700 | -1.65778800 |
| C | -3.83951800 | -3.08822000 | -0.28047900 |
| C | -2.91096200 | -3.45564900 | 0.70092500  |
| C | -2.96850700 | -2.82120300 | 2.01086700  |
| C | -2.29121600 | -0.46873000 | 3.47119400  |
| C | -1.27171100 | -1.46571100 | 3.18215200  |
| C | -1.60629800 | -2.61752800 | 2.46361700  |
| C | -0.71172900 | -3.12091300 | 1.42951300  |
| C | -1.51738400 | -3.64743600 | 0.34942000  |
| C | -1.09357400 | -3.45082700 | -0.97738400 |
| C | -2.06444400 | -3.07564800 | -1.99750700 |
| C | -1.42326700 | -2.16308700 | -2.93217600 |
| C | -2.15335500 | -1.09207100 | -3.47444000 |
| C | -4.31326100 | 2.19278900  | -1.26153800 |
| C | -2.56552800 | 1.20709300  | -3.29088700 |
| C | -4.91719100 | -1.48803500 | 1.26664000  |
| C | 5.15848500  | 2.37913900  | -0.43826100 |
| C | 3.85430900  | 1.91470300  | -0.55069500 |
| C | 4.33379900  | 4.43594600  | 0.46678700  |
| C | 5.42086800  | 3.65735200  | 0.08410900  |

|    |            |             |             |
|----|------------|-------------|-------------|
| C  | 1.92251300 | 4.90490800  | 0.71751900  |
| C  | 0.18250400 | 3.12988700  | 0.21424000  |
| O  | 0.66549500 | 4.53212900  | 0.45038000  |
| O  | 2.13337900 | 6.03012300  | 1.14566500  |
| C  | 6.83934700 | 4.16537900  | 0.20818800  |
| H  | 6.86790000 | 5.15478900  | 0.67819700  |
| H  | 7.45556200 | 3.48616900  | 0.81114300  |
| H  | 7.32616500 | 4.24628500  | -0.77297800 |
| H  | 4.47268200 | 5.44380300  | 0.84716100  |
| H  | 5.96843300 | 1.71727100  | -0.74097500 |
| H  | 3.68140700 | 0.94007400  | -0.98695500 |
| C  | 4.12519600 | -3.05593700 | 1.66135900  |
| C  | 4.09378500 | -4.30000000 | 2.28375000  |
| C  | 3.98574700 | -5.46711300 | 1.52245100  |
| C  | 3.90470500 | -5.37538400 | 0.12843300  |
| C  | 3.93340400 | -4.13421700 | -0.49613700 |
| C  | 4.04658200 | -2.94727200 | 0.25761600  |
| H  | 4.20985100 | -2.14976400 | 2.25438700  |
| H  | 4.14954700 | -4.36040700 | 3.36833800  |
| H  | 3.95810900 | -6.43900000 | 2.01001600  |
| H  | 3.81475300 | -6.27840100 | -0.47144200 |
| H  | 3.87357200 | -4.06458300 | -1.57875800 |
| C  | 4.07492300 | -1.65288600 | -0.38370900 |
| H  | 3.93797600 | -1.55584500 | -1.44677400 |
| H  | 4.16636200 | -0.75947100 | 0.20609500  |
| Br | 6.59657100 | -1.28636000 | -0.90420500 |

### TSb5-1

-2 1

|   | x           | y           | z           |
|---|-------------|-------------|-------------|
| C | -0.69519100 | 0.83998700  | 1.99698600  |
| C | -1.57855300 | -0.14065700 | 1.16011900  |
| C | -3.10459200 | -0.02647100 | 1.33605600  |
| C | -3.87042800 | -1.04796600 | 1.91958300  |
| C | -1.25260900 | 0.18554200  | -0.29231000 |
| C | -0.85994500 | -0.80813200 | -1.27252900 |
| C | -0.46457300 | -2.07742100 | -0.91870300 |
| C | -0.63961100 | -2.68212600 | 0.47785800  |
| C | -0.82482300 | 1.43004600  | -0.73273700 |
| C | -0.17165700 | 1.26660400  | -2.03995100 |
| C | -0.21443700 | -0.13005000 | -2.38226900 |
| C | 0.84385200  | -0.72426800 | -3.07279600 |
| C | 0.65586000  | -2.66903300 | -1.59519500 |
| C | 0.78339500  | -3.26544900 | 0.66018500  |

|   |             |             |             |
|---|-------------|-------------|-------------|
| C | 1.57119900  | -3.09729500 | 1.78048800  |
| C | 1.21131100  | -2.07417100 | 2.77888600  |
| C | 0.12233900  | -1.26690900 | 2.56230600  |
| C | 0.15388600  | 0.11729700  | 2.89456300  |
| C | -0.25291900 | 2.07963600  | 1.54364400  |
| C | -0.43361900 | 2.52715600  | 0.14250400  |
| C | 0.92048400  | 2.03938100  | -2.40082400 |
| C | 1.44985800  | 3.02974400  | -1.45754800 |
| C | 0.83186900  | 3.17279800  | -0.21235000 |
| C | 1.65332500  | 3.32663300  | 0.96713300  |
| C | 0.98945800  | 2.63324500  | 2.05012400  |
| C | 1.75141000  | 1.97129800  | 3.01847200  |
| C | 1.31923800  | 0.67430900  | 3.46162000  |
| C | 2.48324200  | -0.15543100 | 3.65281100  |
| C | 2.42899200  | -1.51081900 | 3.31112300  |
| C | 1.43758000  | -3.39389100 | -0.61320800 |
| C | 5.32187800  | -1.56744100 | 1.02271300  |
| C | 4.81723400  | -2.50477400 | 0.11317800  |
| C | 4.72242800  | -2.16452800 | -1.29637900 |
| C | 5.14161300  | -0.90749600 | -1.74189300 |
| C | 5.66485500  | 0.06138400  | -0.79540100 |
| C | 5.39555700  | 0.71768100  | 1.57054900  |
| C | 4.73307900  | 0.02415600  | 2.65779000  |
| C | 4.68066200  | -1.38983000 | 2.31647200  |
| C | 3.54531200  | -2.13812600 | 2.63404000  |
| C | 3.01461300  | -3.11255100 | 1.69138800  |
| C | 3.64652800  | -3.29334800 | 0.45624600  |
| C | 3.50097300  | -2.75424800 | -1.82188400 |
| C | 2.74383400  | -2.06044500 | -2.76666300 |
| C | 3.18232300  | -0.75483900 | -3.23857200 |
| C | 4.35524400  | -0.18870900 | -2.73337100 |
| C | 4.39282000  | 1.22326000  | -2.39224400 |
| C | 5.21031400  | 1.37874800  | -1.19762100 |
| C | 4.85650100  | 2.32409000  | -0.23025900 |
| C | 4.95703000  | 1.98882700  | 1.18273600  |
| C | 3.65621800  | 0.62739100  | 3.31659600  |
| C | 3.20166200  | 1.95079700  | 2.91655200  |
| C | 3.84021800  | 2.61344900  | 1.86566100  |
| C | 3.05221400  | 3.32891700  | 0.87258600  |
| C | 3.68844400  | 3.16515800  | -0.41428200 |
| C | 2.88478600  | 2.99837300  | -1.55366000 |
| C | 3.25425200  | 2.01287300  | -2.56502900 |
| C | 2.03716700  | 1.42872000  | -3.09450000 |
| C | 2.00058000  | 0.06831000  | -3.43092800 |

|    |             |             |             |
|----|-------------|-------------|-------------|
| C  | 2.83569300  | -3.44198800 | -0.72815400 |
| C  | 1.29680100  | -2.03362200 | -2.66912600 |
| C  | 5.76218300  | -0.26650800 | 0.56334100  |
| C  | -5.19134800 | 1.06194900  | 0.71829800  |
| C  | -3.79787200 | 1.04958100  | 0.77608800  |
| C  | -5.26489700 | -1.05837800 | 1.80971200  |
| C  | -5.94762200 | -0.01886000 | 1.18044700  |
| C  | -3.25274700 | -2.14579200 | 2.67291800  |
| C  | -1.03067200 | -1.60421600 | 1.63156000  |
| O  | -1.89796100 | -2.28223200 | 2.57766700  |
| O  | -3.83508500 | -2.90142900 | 3.42133000  |
| C  | -7.42489000 | -0.14280400 | 0.91575100  |
| H  | -7.98777100 | -0.38561900 | 1.82614600  |
| H  | -7.84198300 | 0.77586300  | 0.48762300  |
| H  | -7.56111200 | -0.97053200 | 0.20529600  |
| H  | -5.79746500 | -1.92130100 | 2.19005400  |
| H  | -5.69200800 | 1.90645900  | 0.24856100  |
| H  | -3.24505300 | 1.86196200  | 0.32344300  |
| C  | -2.47827300 | -4.87259100 | -1.73061700 |
| C  | -2.37898700 | -5.86098200 | -2.71279300 |
| C  | -1.41362000 | -6.86469500 | -2.61798400 |
| C  | -0.55526400 | -6.88999600 | -1.51662100 |
| C  | -0.65558800 | -5.90593900 | -0.53234200 |
| C  | -1.60164800 | -4.87421800 | -0.63417800 |
| H  | -3.28360400 | -4.13773000 | -1.77238500 |
| H  | -3.07507500 | -5.84887400 | -3.54842100 |
| H  | -1.33998500 | -7.63198100 | -3.38672900 |
| H  | 0.18867000  | -7.67846100 | -1.41894400 |
| H  | 0.00668900  | -5.94149000 | 0.32947100  |
| C  | -1.74728400 | -3.81804700 | 0.44454500  |
| H  | -1.74645100 | -4.29542800 | 1.42759000  |
| H  | -2.72769000 | -3.34387600 | 0.31317500  |
| Br | -5.69006800 | -3.19229400 | -0.79228200 |
| C  | -1.08451500 | 5.44820000  | -1.97705300 |
| C  | -1.21261600 | 5.65809500  | -3.34695500 |
| C  | -2.22133700 | 5.01269200  | -4.06706800 |
| C  | -3.10360700 | 4.15713000  | -3.40143600 |
| C  | -2.97853600 | 3.94877400  | -2.03127500 |
| C  | -1.96716300 | 4.59122800  | -1.29283000 |
| H  | -0.30834300 | 5.96062800  | -1.41649100 |
| H  | -0.52241000 | 6.32739100  | -3.85562600 |
| H  | -2.31847100 | 5.17347400  | -5.13832000 |
| H  | -3.89065300 | 3.64790200  | -3.95201700 |
| H  | -3.67134300 | 3.28668200  | -1.52038600 |

|    |             |            |            |
|----|-------------|------------|------------|
| C  | -1.81578000 | 4.35381000 | 0.13700600 |
| H  | -2.55967500 | 3.80274900 | 0.68703100 |
| H  | -1.07232800 | 4.88398200 | 0.70598700 |
| Br | -3.24616400 | 6.42955700 | 1.00137900 |

**TSb5-2**

-2 1

|   | x           | y           | z           |
|---|-------------|-------------|-------------|
| C | 1.45253800  | -0.35805100 | 1.07391100  |
| C | 1.32980600  | 0.96453600  | 0.25689400  |
| C | 2.67243700  | 1.71176200  | 0.26788400  |
| C | 2.99085200  | 2.56376600  | 1.33878300  |
| C | 0.88413900  | 0.51070400  | -1.12800300 |
| C | -0.26506200 | 1.08574700  | -1.82555800 |
| C | -1.22191300 | 1.79066500  | -1.11310900 |
| C | -1.07969300 | 2.23345000  | 0.26984800  |
| C | 1.17156000  | -0.71806700 | -1.68085100 |
| C | 0.21119900  | -0.98394100 | -2.74911000 |
| C | -0.67597400 | 0.15468200  | -2.84680500 |
| C | -2.02619000 | -0.03448800 | -3.17001300 |
| C | -2.62697200 | 1.59909000  | -1.44057600 |
| C | -2.40367000 | 1.95883200  | 0.84791600  |
| C | -2.61719300 | 1.38040600  | 2.09697800  |
| C | -1.46345200 | 0.78567000  | 2.78071300  |
| C | -0.21039900 | 0.83528400  | 2.20394200  |
| C | 0.65279600  | -0.29505600 | 2.26264100  |
| C | 1.77012000  | -1.59076700 | 0.53799800  |
| C | 1.91414400  | -1.84914800 | -0.97906600 |
| C | -0.26889600 | -2.26210900 | -2.99744900 |
| C | 0.17168700  | -3.37156500 | -2.12714800 |
| C | 1.08174200  | -3.14392900 | -1.11237900 |
| C | 0.86507000  | -3.73887500 | 0.16904500  |
| C | 1.27229700  | -2.78246600 | 1.18290600  |
| C | 0.57440300  | -2.73841700 | 2.39400700  |
| C | 0.26243500  | -1.45449900 | 2.95899000  |
| C | -1.04864900 | -1.51997200 | 3.55239800  |
| C | -1.90270200 | -0.41579300 | 3.45017600  |
| C | -3.36250300 | 1.69011600  | -0.20636800 |
| C | -4.77491100 | -2.13887100 | 1.90478500  |
| C | -5.18385400 | -1.08230600 | 1.08216400  |
| C | -5.31543900 | -1.28843400 | -0.35110400 |
| C | -5.01881800 | -2.53349200 | -0.91004500 |
| C | -4.58394400 | -3.62675200 | -0.05819400 |
| C | -3.32844900 | -3.99087600 | 2.03844900  |

|   |             |             |             |
|---|-------------|-------------|-------------|
| C | -2.92761900 | -3.03964400 | 3.05641400  |
| C | -3.81625800 | -1.89007400 | 2.96922100  |
| C | -3.30822600 | -0.60297800 | 3.16179500  |
| C | -3.74099600 | 0.50155300  | 2.31189400  |
| C | -4.68127000 | 0.26130700  | 1.29898700  |
| C | -4.88204900 | -0.07120400 | -1.01925600 |
| C | -4.17391400 | -0.14825800 | -2.21956000 |
| C | -3.86327300 | -1.44555300 | -2.80222900 |
| C | -4.27897100 | -2.61322500 | -2.16095000 |
| C | -3.38057900 | -3.75351600 | -2.07394200 |
| C | -3.57305700 | -4.38122100 | -0.77443600 |
| C | -2.48485000 | -4.92746100 | -0.08860200 |
| C | -2.35789800 | -4.72513100 | 1.34584400  |
| C | -1.57071900 | -2.85637600 | 3.34568300  |
| C | -0.56291500 | -3.61527600 | 2.62235200  |
| C | -0.95181800 | -4.53258400 | 1.64513500  |
| C | -0.21429900 | -4.60677000 | 0.39458800  |
| C | -1.15516800 | -4.85555600 | -0.66971500 |
| C | -0.96581200 | -4.23428600 | -1.90991500 |
| C | -2.10119300 | -3.67523300 | -2.62664500 |
| C | -1.66463000 | -2.46585700 | -3.30504300 |
| C | -2.53481000 | -1.36536500 | -3.39084800 |
| C | -4.48153100 | 0.87698700  | 0.00654200  |
| C | -3.02845800 | 0.71529000  | -2.44262900 |
| C | -4.46369900 | -3.43033100 | 1.32301900  |
| C | 4.97952800  | 1.91874500  | -0.49247700 |
| C | 3.67811600  | 1.44800900  | -0.66629300 |
| C | 4.29871000  | 3.03928400  | 1.51005600  |
| C | 5.31905500  | 2.70317800  | 0.62254900  |
| C | 1.94547800  | 3.10029600  | 2.23052800  |
| C | 0.17179500  | 1.79425300  | 1.07964300  |
| O | 0.66334600  | 2.97951800  | 1.76500900  |
| O | 2.14283600  | 3.73915100  | 3.24063700  |
| C | 6.74182400  | 3.16351000  | 0.82090600  |
| H | 6.92085000  | 3.46309400  | 1.86010300  |
| H | 7.43414600  | 2.35853200  | 0.53643000  |
| H | 6.96807700  | 4.02922500  | 0.18267700  |
| H | 4.48943500  | 3.68984900  | 2.35861100  |
| H | 5.76958300  | 1.61322900  | -1.17716500 |
| H | 3.44795000  | 0.84864600  | -1.53837600 |
| C | 5.58315400  | -2.35493600 | -0.45550100 |
| C | 6.57274600  | -3.12683200 | 0.15550700  |
| C | 6.34613900  | -4.47945800 | 0.40847800  |
| C | 5.13419700  | -5.05895100 | 0.02033200  |

|    |             |             |             |
|----|-------------|-------------|-------------|
| C  | 4.15492200  | -4.28949000 | -0.60948800 |
| C  | 4.35902500  | -2.91884000 | -0.84068900 |
| H  | 5.82722800  | -1.31429000 | -0.66331000 |
| H  | 7.51428800  | -2.63643200 | 0.39011800  |
| H  | 7.11127100  | -5.08667900 | 0.88889600  |
| H  | 4.95263400  | -6.11784200 | 0.19630400  |
| H  | 3.23243000  | -4.76421400 | -0.93156000 |
| C  | 3.36047800  | -2.04294400 | -1.57617300 |
| H  | 3.20582600  | -2.42246300 | -2.59575300 |
| H  | 3.80936300  | -1.05616400 | -1.68396500 |
| Br | 8.19653400  | 0.16978700  | -0.95969400 |
| C  | -2.03015300 | 4.83374500  | -2.15533600 |
| C  | -3.13533700 | 5.15250100  | -2.93987400 |
| C  | -4.36812800 | 5.42540400  | -2.34160100 |
| C  | -4.48330500 | 5.37548500  | -0.94986500 |
| C  | -3.37802400 | 5.05662300  | -0.16549500 |
| C  | -2.12907000 | 4.78733500  | -0.75312000 |
| H  | -1.06929400 | 4.63654100  | -2.62223700 |
| H  | -3.03430300 | 5.18947100  | -4.02212100 |
| H  | -5.23157400 | 5.67440800  | -2.95444200 |
| H  | -5.43809600 | 5.58767100  | -0.47400200 |
| H  | -3.46598900 | 5.03262400  | 0.91706900  |
| C  | -0.97220000 | 4.44017000  | 0.07041600  |
| H  | -1.00303900 | 4.56260400  | 1.13884700  |
| H  | 0.00602400  | 4.38081000  | -0.37767600 |
| Br | -0.17359500 | 7.02972800  | 0.29847200  |

### TSc1

-2 1

|   | x           | y           | z           |
|---|-------------|-------------|-------------|
| C | -2.23528700 | 0.17060300  | 1.24075200  |
| C | -1.68491800 | 1.46135800  | 1.50458800  |
| C | -1.41865300 | 2.39655700  | 0.49165000  |
| C | -1.61408600 | 1.97378400  | -0.90020800 |
| C | -1.60517500 | -0.74684600 | 2.11293000  |
| C | -0.70847100 | -0.01555100 | 3.02034000  |
| C | -0.76450000 | 1.37237200  | 2.64060500  |
| C | 0.38013500  | 2.16972000  | 2.70247600  |
| C | -0.22347500 | 3.18487300  | 0.54671600  |
| C | -0.55218200 | 2.54593200  | -1.69160900 |
| C | -0.01154400 | 1.84733100  | -2.78365900 |
| C | -0.51403600 | 0.53465800  | -3.08394800 |
| C | -1.53177700 | -0.00933000 | -2.27627200 |
| C | -1.45714900 | -1.40831900 | -1.88479600 |

|   |             |             |             |
|---|-------------|-------------|-------------|
| C | -2.01256500 | -1.53745400 | -0.57107000 |
| C | -1.42648900 | -2.41920700 | 0.32389300  |
| C | -1.24987700 | -2.06842900 | 1.73528400  |
| C | 0.48925200  | -0.57978800 | 3.45628800  |
| C | 0.87146900  | -1.91601500 | 3.02837700  |
| C | 0.00768500  | -2.61082800 | 2.15116400  |
| C | 0.59097800  | -3.35793700 | 1.03372900  |
| C | -0.30545900 | -3.24239400 | -0.09015800 |
| C | 0.19856200  | -3.15078800 | -1.39455700 |
| C | -0.39577800 | -2.21970300 | -2.32014400 |
| C | 0.66959000  | -1.64019300 | -3.12743400 |
| C | 0.61234500  | -0.29699400 | -3.49439200 |
| C | 0.31659400  | 3.28936700  | -0.80698700 |
| C | 3.89502800  | 0.71090100  | -2.12680000 |
| C | 3.51878900  | 1.99078500  | -1.69876800 |
| C | 3.72274500  | 2.38060100  | -0.30861400 |
| C | 4.30341200  | 1.47947600  | 0.58863100  |
| C | 4.68238700  | 0.15090700  | 0.14246100  |
| C | 3.98691200  | -1.55093400 | -1.50008400 |
| C | 3.08271000  | -1.43639300 | -2.63246400 |
| C | 3.02467900  | -0.03600800 | -3.01916800 |
| C | 1.81287400  | 0.51966700  | -3.44301900 |
| C | 1.42297100  | 1.84981700  | -3.00026600 |
| C | 2.26244100  | 2.56320100  | -2.13689000 |
| C | 2.61132700  | 3.21810900  | 0.10276400  |
| C | 2.09215800  | 3.09806900  | 1.40256100  |
| C | 2.69772800  | 2.16065300  | 2.33868700  |
| C | 3.77618400  | 1.36812600  | 1.94150800  |
| C | 3.83144600  | -0.03256900 | 2.32768500  |
| C | 4.39840000  | -0.78346400 | 1.21609000  |
| C | 3.90589900  | -2.05926200 | 0.92286300  |
| C | 3.70308100  | -2.45280700 | -0.46803200 |
| C | 1.92645300  | -2.22053600 | -2.68577400 |
| C | 1.63206800  | -3.15926500 | -1.61369900 |
| C | 2.50337100  | -3.26278700 | -0.52305100 |
| C | 1.97444700  | -3.37374300 | 0.83073800  |
| C | 2.85549100  | -2.65053700 | 1.72729700  |
| C | 2.29188900  | -1.91518000 | 2.78869200  |
| C | 2.80603100  | -0.58632000 | 3.09610100  |
| C | 1.68765000  | 0.24119200  | 3.51746900  |
| C | 1.63443600  | 1.58746300  | 3.14790800  |
| C | 1.69660700  | 3.31186100  | -1.02094500 |
| C | 0.66781800  | 3.11060800  | 1.63783000  |
| C | 4.49772300  | -0.22543500 | -1.19593500 |



|   |             |             |             |
|---|-------------|-------------|-------------|
| C | -6.13569400 | -2.08395700 | -0.08128300 |
| C | -4.77988700 | -1.76750300 | -0.16733000 |
| C | -4.30794800 | -0.44434600 | -0.15879400 |
| C | -5.26491600 | 0.59304100  | -0.03282200 |
| C | -6.61776100 | 0.24469000  | 0.09420400  |
| C | -7.08552400 | -1.07029600 | 0.05255900  |
| C | -2.75628700 | -0.23568700 | -0.14976900 |
| C | -5.00921200 | 2.12269800  | -0.08762000 |
| C | -2.15068600 | 0.73379700  | -1.21456700 |
| O | -4.27880200 | 2.49421800  | -1.04219600 |
| O | -5.62642600 | 2.80495300  | 0.76082000  |
| C | -8.56425100 | -1.37791000 | 0.13778200  |
| H | -8.74312700 | -2.40402100 | 0.48423600  |
| H | -9.07517800 | -0.69516200 | 0.82808700  |
| H | -9.06271800 | -1.27495600 | -0.83797100 |
| H | -7.31172000 | 1.06829700  | 0.24554700  |
| H | -6.44557000 | -3.12902100 | -0.10377700 |
| H | -4.06890700 | -2.58354800 | -0.23529500 |
